# Supplementary material for: Exploration of Novel Chemical Space: Synthesis and in vitro Evaluation of N‐Functionalized Tertiary Sulfonimidamides
Source: PubMed Central journal article supplement — Chemistry. 2018 Jun 19;24(37):9295–304. doi: 10.1002/chem.201801557 (PMC6055826; doi:10.1002/chem.201801557), 2018-06-19
Supplement: CHEM-24-9295-s001.pdf [file CHEM-24-9295-s001.pdf]

# CHEMISTRY

## A **European** Journal

### Supporting Information

#### **Exploration of Novel Chemical Space: Synthesis and in vitro Evaluation of N-Functionalized Tertiary Sulfonimidamides**

Flavia Izzo,<sup>[a]</sup> Martina Schäfer,<sup>[b]</sup> Philip Lienau,<sup>[b]</sup> Ursula Ganzer,<sup>[b]</sup> Robert Stockman,<sup>\*[a]</sup> and  
Ulrich Lücking<sup>\*[b]</sup>

chem\_201801557\_sm\_miscellaneous\_information.pdf

# Exploration of Novel Chemical Space: Synthesis and in vitro Evaluation of N-Functionalized Tertiary Sulfonimidamides

Flavia Izzo,<sup>a</sup> Martina Schäfer,<sup>b</sup> Philip Lienau,<sup>b</sup> Ursula Ganzer,<sup>b</sup> Robert Stockman,<sup>\*a</sup> and Ulrich Lücking<sup>\*b</sup>

<sup>a</sup> School of Chemistry – University of Nottingham, University Park, Nottingham, NG7 2RD, United Kingdom

<sup>b</sup> Bayer AG, Pharmaceuticals Division, Drug Discovery, Müllerstr. 178, 13353 Berlin, Germany

\* E-mail: [Robert.Stockman@nottingham.ac.uk](mailto:Robert.Stockman@nottingham.ac.uk), [ulrich.luecking@bayer.com](mailto:ulrich.luecking@bayer.com)

## Table of Contents

|                                                                                                                                                  |         |
|--------------------------------------------------------------------------------------------------------------------------------------------------|---------|
| General methods and materials.....                                                                                                               | S2      |
| N-Arylation of sulfonimidamide <b>2aa</b> .....                                                                                                  | S3–S9   |
| N-Alkylation of sulfonimidamide <b>2aa</b> .....                                                                                                 | S10–S16 |
| N-Trifluoromethylation of sulfonimidamide <b>2aa</b> .....                                                                                       | S17     |
| N-Cyanation of sulfonimidamide <b>2aa</b> .....                                                                                                  | S18     |
| N-Sulfonylation of sulfonimidamide <b>2aa</b> .....                                                                                              | S19     |
| N-Alkoxy carbonylation of sulfonimidamide <b>2aa</b> (carbamate formation).....                                                                  | S21–S22 |
| N-Aminocarbonylation of sulfonimidamide <b>2aa</b> (urea formation).....                                                                         | S23–S25 |
| <sup>1</sup> H and <sup>13</sup> C NMR spectra of N-functionalized sulfonimidamides.....                                                         | S26–S72 |
| Small molecule X-ray structures of compounds <b>2bg</b> , <b>2bj</b> , <b>2bk</b> and <b>2bm</b> .....                                           | S73–S74 |
| Comparison of the in vitro properties (additional examples).....                                                                                 | S75     |
| Correlation of predicted metabolic stabilities in human liver microsomes with the corresponding log <i>D</i> values (all tested compounds) ..... | S76     |
| References.....                                                                                                                                  | S77     |

## General methods and materials

Commercially available reagents and anhydrous solvents were purchased from Alfa Aesar, abcr, Acros Organics, Merck and Sigma-Aldrich, and were used without further purification. All reactions were carried out in microwave (MW) vials (Biotage<sup>®</sup>) and under Ar or O<sub>2</sub> atmosphere. Reactions were monitored by UPLC analysis with a Waters Acquity UPLC MS Single Quad system; column: Acquity UPLC BEH C18 1.7 μm, 50 × 2.1 mm; eluent A: H<sub>2</sub>O + 0.2 vol% aq NH<sub>3</sub> (32%), eluent B: MeCN; gradient: 0–1.6 min 1–99% B, 1.6–2.0 min 99% B; flow: 0.8 mL/min; temperature: 60 °C; DAD scan: 210–400 nm. Flash chromatography was carried out using a Biotage<sup>®</sup> Isolera™ One system with 200–400 nm variable detector, using Biotage<sup>®</sup> SNAP KP-Sil and KP-NH cartridges. Preparative HPLC was carried out with a Waters AutoPurification MS Single Quad system; column: Waters XBridge C18 5 μm, 100 × 30 mm; eluent A: H<sub>2</sub>O + 0.2 vol% aq NH<sub>3</sub> (32%), eluent B: MeCN; gradient: 0–0.50 min 5% B, flow: 25 mL/min; 0.51–5.50 min 10–100% B, flow: 70 mL/min; 5.51–6.50 min 100% B, flow: 70 mL/min; temperature: 25 °C; DAD scan: 210–400 nm. Analytical TLC was carried out on aluminum-backed plates coated with Merck Kieselgel 60 F254, with visualization under UV light at 254 nm and, where not possible, using KMnO<sub>4</sub> stain. NMR spectra were recorded on Bruker Avance III HD, Bruker AV400 or Bruker AV(III)400 spectrometers. <sup>1</sup>H NMR spectra were obtained at 400 MHz and referenced to the residual solvent signal (7.26 ppm for CDCl<sub>3</sub>, 2.50 ppm for [D<sub>6</sub>]DMSO). <sup>13</sup>C NMR spectra were obtained at 101 MHz and also referenced to the residual solvent signal (77.16 ppm for CDCl<sub>3</sub>, 39.52 ppm for [D<sub>6</sub>]DMSO). All spectra were obtained at ambient temperature (22 ± 1 °C). Data are reported as follows: chemical shift (δ) in ppm, multiplicity (standard abbreviations), coupling constant(s) (Hz), and integration. High-resolution mass spectra were recorded on a Xevo<sup>®</sup> G2-XS QToF (Waters) instrument or an OpenAccess Bruker micrOTOF spectrometer. Melting points were determined with a Büchi B-540 or Stuart Scientific SMP20 melting point apparatus. Solutions of compounds were dried by filtration through water-repellent filter paper (MACHEREY-NAGEL 617 WA, 125 mm diam). Petroleum ether (PE) refers to the fraction with a boiling range of 40–60 °C. Sulfonimidamide **2aa** was synthesized according to a reported procedure.<sup>[1]</sup>

## N-Arylation of sulfonimidamide **2aa**

### General procedure A:

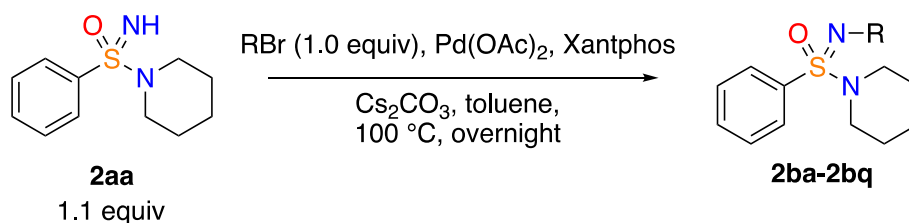

In a dry MW vial flushed with Ar, sulfonimidamide **2aa** (100 mg, 0.45 mmol, 1.1 equiv) and an aryl bromide (0.40 mmol, 1.0 equiv) were dissolved in toluene (6.8 mL). The mixture was then degassed for 10 min and Pd(OAc)<sub>2</sub> (4.5 mg, 0.02 mmol, 5 mol%), Xantphos (23 mg, 0.04 mmol, 10 mol%) and Cs<sub>2</sub>CO<sub>3</sub> (200 mg, 0.60 mmol, 1.5 equiv) were added at RT. The reaction mixture was heated to 100 °C and stirred overnight. Once the starting material had been consumed (monitored by TLC), the mixture was cooled, diluted with methyl *tert*-butyl ether, filtered through a pad of Celite under reduced pressure and washed with methyl *tert*-butyl ether. Solvent was removed under reduced pressure and the crude product was purified by flash column chromatography.

### 1-(*N,S*-Diphenylsulfonimidoyl)piperidine (**2ba**)

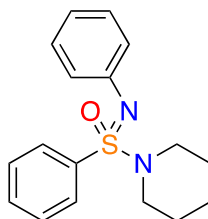

Prepared according to general procedure **A**, from bromobenzene; crude purified by flash column chromatography (KP-Sil, 0–30% EtOAc in PE) to give **2ba** as a white solid (104 mg, 86%): m.p. 118–120 °C; <sup>1</sup>H NMR (400 MHz, CDCl<sub>3</sub>): δ = 8.01–7.96 (m, 2H), 7.62–7.52 (m, 3H), 7.27 (d, *J* = 6.1 Hz, 2H), 7.25 (d, *J* = 2.4 Hz, 2H), 6.98 (tt, *J* = 5.70, 2.91 Hz, 1H), 3.10–2.99 (m, 4H), 1.58–1.49 (m, 4H), 1.37 ppm (quin, *J* = 6.08 Hz, 2H); <sup>13</sup>C NMR (101 MHz, CDCl<sub>3</sub>): δ = 143.9, 136.6, 132.3, 129.9, 128.9, 127.9, 123.9, 121.8, 47.6, 25.4, 23.7 ppm; IR (KBr): ν = 3074, 2939, 2849, 1585, 1485, 1306, 1219, 931, 781, 694 cm<sup>-1</sup>; HRMS (ESI-TOF) *m/z* [*M* + H]<sup>+</sup> calcd for C<sub>17</sub>H<sub>21</sub>N<sub>2</sub>OS: 301.1375, found: 301.1378.

### 1-[*N*-(2-Fluorophenyl)-*S*-phenylsulfonimidoyl]piperidine (**2bb**)

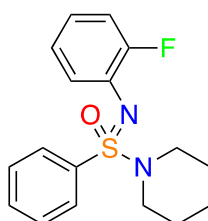

Prepared according to general procedure **A**, from 1-bromo-2-fluorobenzene; crude purified by flash column chromatography (KP-Sil, 0–30% EtOAc in hexane) to give **2bb** as a white solid (59 mg, 46%): m.p. 76–78 °C; <sup>1</sup>H NMR (400 MHz, CDCl<sub>3</sub>): δ = 8.03–7.97 (m, 2H), 7.62–7.50 (m, 3H), 7.43 (td, *J* = 8.2, 1.8 Hz, 1H), 7.05 (ddd, *J* = 10.9, 7.9, 1.7 Hz, 1H), 6.98 (td, *J* = 7.6, 1.8 Hz, 1H), 6.95–6.88 (m, 1H), 3.04 (t, *J* = 5.5 Hz, 4H), 1.51 (qdd, *J* = 13.4, 6.8, 4.3 Hz, 4H), 1.39–1.30 ppm (m,

2H);  $^{13}\text{C}$  NMR (101 MHz,  $\text{CDCl}_3$ ):  $\delta$  = 156.9 (d,  $J$  = 244.2 Hz), 136.5, 132.5, 131.7 (d,  $J$  = 11.4 Hz), 129.0, 128.1, 125.6 (d,  $J$  = 1.9 Hz), 124.1 (d,  $J$  = 3.8 Hz), 122.7 (d,  $J$  = 7.3 Hz), 115.9 (d,  $J$  = 20.4 Hz), 47.6, 25.5, 23.7 ppm; IR (KBr):  $\nu$  = 3076, 2935, 2849, 1603, 1495, 1315, 1227, 928, 750  $\text{cm}^{-1}$ ; HRMS (ESI-TOF)  $m/z$  [ $M + \text{H}$ ] $^+$  calcd for  $\text{C}_{17}\text{H}_{20}\text{N}_2\text{OFS}$ : 319.1280, found: 319.1281.

### 1-[*N*-(3-Fluorophenyl)-*S*-phenylsulfonimidoyl]piperidine (**2bc**)

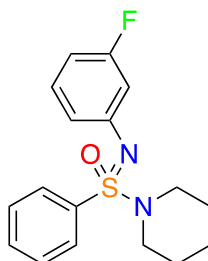

Prepared according to general procedure **A**, from 1-bromo-3-fluorobenzene; crude purified by flash column chromatography (KP-Sil, 0–20% EtOAc in hexane) to give **2bc** as a white solid (124 mg, 97%): m.p. 92–94 °C;  $^1\text{H}$  NMR (400 MHz,  $\text{CDCl}_3$ ):  $\delta$  = 7.99–7.93 (m, 2H), 7.63–7.49 (m, 3H), 7.16 (td,  $J$  = 8.1, 6.8 Hz, 1H), 7.01 (ddd,  $J$  = 7.9, 2.0, 1.0 Hz, 1H), 6.97 (dt,  $J$  = 11.1, 2.3 Hz, 1H), 6.66 (tdd,  $J$  = 8.4, 2.6, 0.9 Hz, 1H), 3.11–2.94 (m, 4H), 1.54 (m, 4H), 1.37 ppm (quin,  $J$  = 5.9 Hz, 2H);  $^{13}\text{C}$  NMR (101 MHz,  $\text{CDCl}_3$ ):  $\delta$  = 164.4, 162.0, 145.6 (d,  $J$  = 10.5 Hz), 136.1, 132.4, 129.6 (d,  $J$  = 9.8 Hz), 128.8, 127.7, 119.4 (d,  $J$  = 2.6 Hz), 110.6 (d,  $J$  = 22.8 Hz), 108.4 (d,  $J$  = 21.3 Hz), 47.4, 25.3, 23.5 ppm; IR (KBr):  $\nu$  = 3076, 2937, 2849, 1604, 1225, 1148, 1094  $\text{cm}^{-1}$ ; HRMS (ESI-TOF)  $m/z$  [ $M + \text{H}$ ] $^+$  calcd for  $\text{C}_{17}\text{H}_{20}\text{N}_2\text{OFS}$ : 319.1280, found: 319.1281.

### 1-[*N*-(4-Fluorophenyl)-*S*-phenylsulfonimidoyl]piperidine (**2bd**)

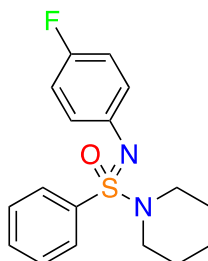

Prepared according to general procedure **A**, from 1-bromo-4-fluorobenzene; crude purified by flash column chromatography (KP-Sil, 0–30% EtOAc in hexane) to give **2bd** as a white solid (91 mg, 72%): m.p. 83–85 °C;  $^1\text{H}$  NMR (400 MHz,  $\text{CDCl}_3$ ):  $\delta$  = 7.97–7.94 (m, 2H), 7.58–7.51 (m, 3H), 7.21 (m, 2H), 6.95 (m, 2H), 3.01 (m, 4H), 1.59–1.44 (m, 4H), 1.37 ppm (quin,  $J$  = 5.8 Hz, 2H);  $^{13}\text{C}$  NMR (101 MHz,  $\text{CDCl}_3$ ):  $\delta$  = 159.6, 157.3, 136.4, 132.4, 128.9, 127.9, 124.8 (d,  $J$  = 7.7 Hz), 115.5 (d,  $J$  = 22.1 Hz), 47.6, 25.4, 23.7 ppm; IR (KBr):  $\nu$  = 3053, 2939, 2847, 1499, 1207, 1016, 919  $\text{cm}^{-1}$ ; HRMS (ESI-TOF)  $m/z$  [ $M + \text{H}$ ] $^+$  calcd for  $\text{C}_{17}\text{H}_{20}\text{N}_2\text{OFS}$ : 319.1280, found: 319.1281.

### 1-[S-Phenyl-N-(2-tolyl)sulfonimidoyl]piperidine (2be)

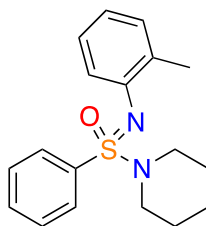

Prepared according to general procedure **A**, from 2-bromotoluene; crude purified by flash column chromatography (KP-Sil, 0–20% EtOAc in hexane) to give **2be** as a yellow oil (122 mg, 97%):  $^1\text{H}$  NMR (400 MHz,  $\text{CDCl}_3$ ):  $\delta$  = 8.00–7.97 (m, 2H), 7.60–7.51 (m, 3H), 7.38 (dd,  $J$  = 8.0, 1.2 Hz, 1H), 7.15 (dd,  $J$  = 7.4, 1.7 Hz, 1H), 7.06 (td,  $J$  = 7.7, 1.7 Hz, 1H), 6.88 (td,  $J$  = 7.4, 1.3 Hz, 1H), 3.06 (ddd,  $J$  = 11.3, 7.0, 3.9 Hz, 2H), 2.96 (ddd,  $J$  = 11.4, 7.0, 3.9 Hz, 2H), 2.39 (s, 3H), 1.60–1.45 (m, 4H), 1.36 ppm (quin,  $J$  = 6.1 Hz, 2H);  $^{13}\text{C}$  NMR (101 MHz,  $\text{CDCl}_3$ ):  $\delta$  = 142.1, 137.1, 132.2, 132.0, 130.2, 128.7, 127.8, 126.2, 122.1, 121.5, 47.3, 25.3, 23.6, 18.8 ppm; IR (KBr):  $\nu$  = 3063, 3015, 2935, 2849, 1596, 1487, 1313, 1290, 1269, 1227, 1121, 914  $\text{cm}^{-1}$ ; HRMS (ESI-TOF)  $m/z$  [ $M + \text{H}$ ] $^+$  calcd for  $\text{C}_{18}\text{H}_{23}\text{N}_2\text{OS}$ : 315.1531, found: 315.1534.

### 1-[S-Phenyl-N-(3-tolyl)sulfonimidoyl]piperidine (2bf)

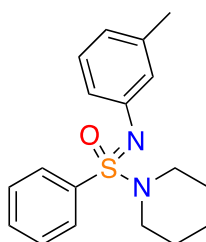

Prepared according to general procedure **A**, from 3-bromotoluene; crude purified by flash column chromatography (KP-Sil, 0–30% EtOAc in hexane) to give **2bf** as a white solid (106 mg, 84%): m.p. 67–70  $^\circ\text{C}$ ;  $^1\text{H}$  NMR (400 MHz,  $\text{CDCl}_3$ ):  $\delta$  = 7.99–7.95 (m, 2H), 7.59–7.50 (m, 3H), 7.12 (t,  $J$  = 7.5 Hz, 1H), 7.08–7.06 (m, 2H), 6.81–6.76 (m, 1H), 3.09–2.98 (m, 4H), 2.31 (s, 3H), 1.61–1.45 (m, 4H), 1.37 ppm (quin,  $J$  = 5.7 Hz, 2H);  $^{13}\text{C}$  NMR (101 MHz,  $\text{CDCl}_3$ ):  $\delta$  = 143.5, 138.5, 136.5, 132.1, 128.7, 128.6, 127.8, 124.5, 122.6, 120.6, 47.4, 25.3, 23.6, 21.5 ppm; IR (KBr):  $\nu$  = 3070, 2932, 2853, 1597, 1485, 1300, 1223, 1059, 926  $\text{cm}^{-1}$ ; HRMS (ESI-TOF)  $m/z$  [ $M + \text{H}$ ] $^+$  calcd for  $\text{C}_{18}\text{H}_{23}\text{N}_2\text{OS}$ : 315.1531, found: 315.1535.

### 1-[S-Phenyl-N-(4-tolyl)sulfonimidoyl]piperidine (2bg)

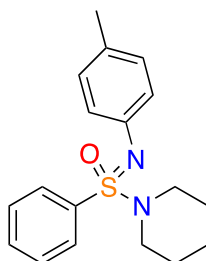

Prepared according to general procedure **A**, from 4-bromotoluene; crude purified by flash column chromatography (KP-Sil, 0–20% EtOAc in hexane) to give **2bg** as a white solid (125 mg, 99%): m.p. 113–115  $^\circ\text{C}$ ;  $^1\text{H}$  NMR (400 MHz,  $\text{CDCl}_3$ ):  $\delta$  = 7.99–7.95 (m, 2H), 7.59–7.50 (m, 3H), 7.15–7.12 (m, 2H), 7.05–7.03 (m, 2H), 3.02 (qt,  $J$  = 11.2, 4.8 Hz, 4H), 2.28 (s, 3H), 1.60–1.45 (m, 4H), 1.36 ppm (quin,  $J$  = 5.9 Hz, 2H);  $^{13}\text{C}$  NMR (101 MHz,  $\text{CDCl}_3$ ):  $\delta$  = 140.8, 136.5, 132.1, 131.0,

129.5, 128.7, 127.8, 123.5, 47.4, 25.3, 23.6, 20.8 ppm; IR (KBr):  $\nu = 3026, 2935, 2847, 1506, 1310, 1221, 1055, 918 \text{ cm}^{-1}$ ; HRMS (ESI-TOF)  $m/z [M + H]^+$  calcd for  $C_{18}H_{23}N_2OS$ : 315.1531, found: 315.1530.

#### 1-(*N*-Mesityl-*S*-phenylsulfonimidoyl)piperidine (**2bh**)

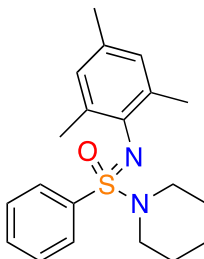

Prepared according to general procedure **A**, from 2-bromo-1,3,5-trimethylbenzene; crude purified by flash column chromatography (KP-Sil, 0–30% EtOAc in hexane) to give **2bh** as a white solid (4 mg, 3%): m.p. 92–94 °C;  $^1\text{H NMR}$  (400 MHz,  $\text{CDCl}_3$ ):  $\delta = 7.96\text{--}7.93$  (m, 2H), 7.55–7.48 (m, 3H), 6.81 (s, 2H), 3.02 (t,  $J = 5.4$  Hz, 4H), 2.32 (s, 6H), 2.22 (s, 3H), 1.58 (m, 4H), 1.41–1.35 ppm (m, 2H);  $^{13}\text{C NMR}$  (101 MHz,  $\text{CDCl}_3$ ):  $\delta = 138.6, 137.8, 133.2, 131.6, 128.9, 128.5, 127.6, 47.5, 25.5, 23.7, 20.7, 20.6$  ppm; IR (KBr):  $\nu = 3056, 2936, 1479, 1272, 1222, 1059, 903 \text{ cm}^{-1}$ ; HRMS (ESI-TOF)  $m/z [M + H]^+$  calcd for  $C_{20}H_{27}N_2OS$ : 343.1839, found: 343.1849.

#### 1-[*N*-(3-Methoxyphenyl)-*S*-phenylsulfonimidoyl]piperidine (**2bi**)

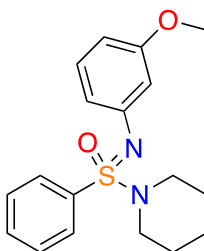

Prepared according to general procedure **A**, from 3-bromoanisole; crude purified by flash column chromatography (KP-Sil, 0–30% EtOAc in hexane) to give **2bi** as a yellow solid (86 mg, 65%): m.p. 69–72 °C;  $^1\text{H NMR}$  (400 MHz,  $\text{CDCl}_3$ ):  $\delta = 7.98\text{--}7.95$  (m, 2H), 7.60–7.51 (m, 3H), 7.13 (t,  $J = 8.1$  Hz, 1H), 6.86 (ddd,  $J = 7.9, 2.0, 1.0$  Hz, 1H), 6.81 (t,  $J = 2.2$  Hz, 1H), 6.54 (ddd,  $J = 8.2, 2.5, 0.9$  Hz, 1H), 3.79 (s, 3H), 3.03 (qdd,  $J = 11.6, 6.5, 4.1$  Hz, 4H), 1.60–1.50 (m, 4H), 1.36 ppm (quin,  $J = 5.9$  Hz, 2H);  $^{13}\text{C NMR}$  (101 MHz,  $\text{CDCl}_3$ ):  $\delta = 160.1, 145.0, 136.5, 132.2, 129.4, 128.8, 127.8, 116.2, 109.2, 107.8, 55.2, 47.4, 25.3, 23.6$  ppm; IR (KBr):  $\nu = 3063, 2995, 2937, 2833, 1593, 1236, 1200, 1159, 916 \text{ cm}^{-1}$ ; HRMS (ESI-TOF)  $m/z [M + H]^+$  calcd for  $C_{18}H_{23}N_2O_2S$ : 331.1480, found: 331.1480.

#### 4-[[Oxo(phenyl)(piperidin-1-yl)- $\lambda^6$ -sulfanylidene]amino]benzonitrile (**2bj**)

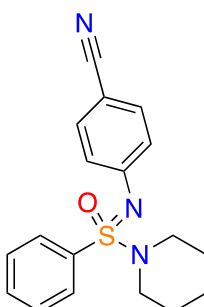

Prepared according to general procedure **A**, from 4-bromobenzonitrile; crude purified by flash column chromatography (KP-Sil, 0–30% EtOAc in hexane) to give **2bj** as a white solid (115 mg, 88%): m.p. 136–139 °C; <sup>1</sup>H NMR (400 MHz, CDCl<sub>3</sub>): δ = 7.96–7.93 (m, 2H), 7.64–7.60 (m, 1H), 7.59–7.54 (m, 2H), 7.52–7.49 (m, 2H), 7.29–7.27 (m, 2H), 3.06 (ddd, *J* = 11.3, 7.1, 3.9 Hz, 2H), 2.97 (ddd, *J* = 11.4, 7.1, 3.8 Hz, 2H), 1.62–1.47 (m, 4H), 1.38 ppm (quin, *J* = 5.9 Hz, 2H); <sup>13</sup>C NMR (101 MHz, CDCl<sub>3</sub>): δ = 149.0, 135.6, 133.1, 132.8, 129.0, 127.7, 123.8, 119.8, 104.1, 47.3, 25.2, 23.4 ppm; IR (KBr): ν = 3057, 2941, 2849, 2226, 1599, 1497, 1227, 845, 741 cm<sup>-1</sup>; HRMS (ESI-TOF) *m/z* [*M* + H]<sup>+</sup> calcd for C<sub>18</sub>H<sub>20</sub>N<sub>3</sub>OS: 326.1327, found: 326.1325;

#### Methyl 4-[[oxo(phenyl)(piperidin-1-yl)-λ<sup>6</sup>-sulfanylidene]amino]benzoate (**2bk**)

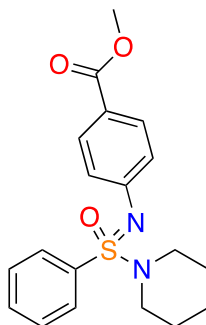

Prepared according to general procedure **A**, from methyl 4-bromobenzoate; crude purified by flash column chromatography (KP-Sil, 0–30% EtOAc in hexane) to give **2bk** as a white solid (142 mg, 99%): m.p. 104–106 °C; <sup>1</sup>H NMR (400 MHz, CDCl<sub>3</sub>): δ = 7.98–7.95 (m, 2H), 7.94–7.90 (m, 2H), 7.62–7.52 (m, 3H), 7.28–7.25 (m, 2H), 3.88 (s, 3H), 3.06 (ddd, *J* = 11.2, 7.1, 3.9 Hz, 2H), 2.98 (ddd, *J* = 11.5, 7.1, 3.8 Hz, 2H), 1.60–1.45 (m, 4H), 1.36 ppm (quin, *J* = 5.9 Hz, 2H); <sup>13</sup>C NMR (101 MHz, CDCl<sub>3</sub>): δ = 167.3, 149.2, 136.0, 132.5, 130.7, 128.9, 127.8, 123.1, 51.8, 47.3, 25.2, 23.5 ppm; IR (KBr): ν = 2941, 2837, 1713, 1269, 1101, 916 cm<sup>-1</sup>; HRMS (ESI-TOF) *m/z* [*M* + H]<sup>+</sup> calcd for C<sub>19</sub>H<sub>23</sub>N<sub>2</sub>O<sub>3</sub>S: 359.1429, found: 359.1427.

#### 1-{S-Phenyl-N-[4-(trifluoromethyl)phenyl]sulfonimidoyl}piperidine (**2bl**)

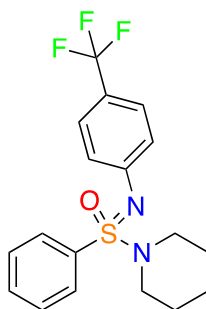

Prepared according to general procedure **A**, from 4-bromobenzotrifluoride; crude purified by flash column chromatography (KP-Sil, 0–50% EtOAc in hexane) to give **2bl** as a white solid (149 mg, quantitative): m.p. 102–104 °C; <sup>1</sup>H NMR (400 MHz, CDCl<sub>3</sub>): δ = 7.98–7.95 (m, 2H), 7.63–7.53 (m, 3H), 7.47 (d, *J* = 8.8 Hz, 2H), 7.30 (d, *J* = 8.2 Hz, 2H), 3.06 (ddd, *J* = 11.2, 7.1, 3.9 Hz, 2H), 2.98 (ddd, *J* = 11.4, 7.0, 3.9 Hz, 2H), 1.62–1.47 (m, 4H), 1.37 ppm (quin, *J* = 5.9 Hz, 2H); <sup>13</sup>C NMR (101 MHz, CDCl<sub>3</sub>): δ = 147.5, 135.9, 132.5, 128.9, 127.8, 126.1 (q, *J* = 3.7 Hz), 123.3, 47.4, 25.2, 23.5 ppm; IR (KBr): ν = 3065, 2939, 2851, 1610, 1512, 1308, 1229, 1101 cm<sup>-1</sup>; HRMS (ESI-TOF) *m/z* [*M* + H]<sup>+</sup> calcd for C<sub>18</sub>H<sub>20</sub>N<sub>2</sub>OF<sub>3</sub>S: 369.1248, found: 369.1243.



## 2-[[Oxo(phenyl)(piperidin-1-yl)-λ<sup>6</sup>-sulfanylidene]amino]pyridine (**2bm**)

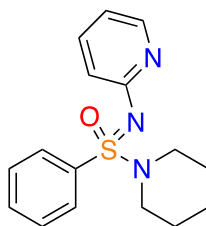

Prepared according to general procedure **A**, from 2-bromopyridine; crude purified by flash column chromatography (KP-Sil, 0–50% EtOAc in hexane) to give **2bm** as a white solid (85 mg, 71%): m.p. 108–110 °C; <sup>1</sup>H NMR (400 MHz, CDCl<sub>3</sub>): δ = 8.28 (ddd, *J* = 5.0, 2.1, 0.9 Hz, 1H), 8.01–7.99 (m, 2H), 7.59–7.49 (m, 4H), 7.10 (m, 1H), 6.83 (ddd, *J* = 7.3, 4.9, 1.0 Hz, 1H), 3.10 (t, *J* = 5.5 Hz, 4H), 1.54 (m, 4H), 1.38 ppm (quin, *J* = 5.7 Hz, 2H); <sup>13</sup>C NMR (101 MHz, CDCl<sub>3</sub>): δ = 157.3, 148.6, 137.5, 136.6, 132.3, 128.8, 127.9, 117.3, 116.8, 47.2, 25.3, 23.6 ppm; IR (KBr): ν = 2935, 2922, 2854, 2843, 1585, 1554, 1462, 1423, 1228, 1095, 980 cm<sup>-1</sup>; HRMS (ESI-TOF) *m/z* [*M* + H]<sup>+</sup> calcd for C<sub>16</sub>H<sub>20</sub>N<sub>3</sub>OS: 302.1327, found: 302.1330.

## 3-[[Oxo(phenyl)(piperidin-1-yl)-λ<sup>6</sup>-sulfanylidene]amino]pyridine (**2bn**)

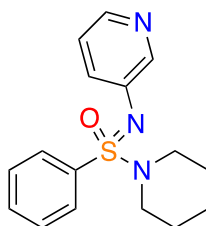

Prepared according to general procedure **A**, from 3-bromopyridine; crude purified by flash column chromatography (KP-Sil, 0–50% EtOAc in hexane) to give **2bn** as a colorless oil (93 mg, 77%): <sup>1</sup>H NMR (400 MHz, CDCl<sub>3</sub>): δ = 8.52 (dd, *J* = 2.7, 0.8 Hz, 1H), 8.20 (dd, *J* = 4.8, 1.5 Hz, 1H), 7.99–7.96 (m, 2H), 7.63–7.54 (m, 4H), 7.15 (ddd, *J* = 8.2, 4.7, 0.9 Hz, 1H), 3.06 (ddd, *J* = 11.2, 7.1, 3.9 Hz, 2H), 2.98 (ddd, *J* = 11.6, 7.0, 3.9 Hz, 2H), 1.61–1.46 (m, 4H), 1.36 ppm (quin, *J* = 5.9 Hz, 2H); <sup>13</sup>C NMR (101 MHz, CDCl<sub>3</sub>): δ = 135.8, 132.5, 130.0, 128.9, 127.8, 123.5, 47.4, 25.2, 23.5 ppm; IR (KBr): ν = 3059, 3028, 2939, 2851, 1578, 1560, 1475, 1294, 1230, 1107, 1063, 918 cm<sup>-1</sup>; HRMS (ESI-TOF) *m/z* [*M* + H]<sup>+</sup> calcd for C<sub>16</sub>H<sub>20</sub>N<sub>3</sub>OS: 302.1327, found: 302.1326.

## 4-[[Oxo(phenyl)(piperidin-1-yl)-λ<sup>6</sup>-sulfanylidene]amino]pyridine (**2bo**)

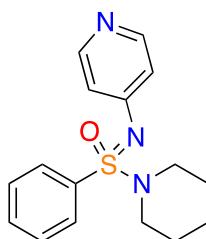

Prepared according to general procedure **A**, from 4-bromopyridine; crude purified by flash column chromatography (KP-Sil, 0–80% EtOAc in hexane) to give **2bo** as a colorless oil (87 mg, 72%): <sup>1</sup>H NMR (400 MHz, CDCl<sub>3</sub>): δ = 8.37–8.35 (m, 2H), 7.96–7.93 (m, 2H), 7.64–7.54 (m, 3H), 7.12–7.10 (m, 2H), 3.07 (ddd, *J* = 11.3, 7.2, 4.0 Hz, 2H), 2.97 (ddd, *J* = 11.6, 7.0, 3.9 Hz, 2H), 1.64–1.49 (m, 4H), 1.39 ppm (quin, *J* = 5.9 Hz, 2H); <sup>13</sup>C NMR (101 MHz, CDCl<sub>3</sub>): δ = 151.8, 150.3, 135.6, 132.7, 129.0, 127.7, 118.5, 47.3, 25.2, 23.4 ppm; IR (KBr): ν = 3059, 3016, 2937, 2849, 1587, 1315,

1298, 1230, 1209, 1103, 1016  $\text{cm}^{-1}$ ; HRMS (ESI-TOF)  $m/z$  [ $M + H$ ] $^+$  calcd for  $\text{C}_{16}\text{H}_{20}\text{N}_3\text{OS}$ : 302.1327, found: 302.1327.

### 2-[[Oxo(phenyl)(piperidin-1-yl)- $\lambda^6$ -sulfanylidene]amino]pyrimidine (**2bp**)

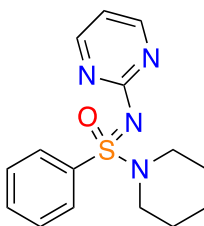

Prepared according to general procedure **A**, from 2-bromopyrimidine; crude purified by flash column chromatography (KP-NH, 0–50% EtOAc in hexane) to give **2bp** as a yellow solid (93 mg, 77%): m.p. 122–128  $^{\circ}\text{C}$ ;  $^1\text{H}$  NMR (400 MHz,  $\text{CDCl}_3$ ):  $\delta$  = 8.45 (d,  $J$  = 4.8 Hz, 2H), 7.99–7.96 (m, 2H), 7.59–7.55 (m, 1H), 7.53–7.49 (m, 2H), 6.76 (t,  $J$  = 4.8 Hz, 1H), 3.22–3.13 (m, 4H), 1.61 (m, 4H), 1.43 ppm (quin,  $J$  = 5.9 Hz, 2H);  $^{13}\text{C}$  NMR (101 MHz,  $\text{CDCl}_3$ ):  $\delta$  = 163.2, 158.3, 136.7, 132.4, 128.8, 127.9, 113.8, 46.8, 25.3, 23.6 ppm; IR (KBr):  $\nu$  = 3026, 2947, 2849, 1545, 1408, 1238, 926  $\text{cm}^{-1}$ ; HRMS (ESI-TOF)  $m/z$  [ $M + H$ ] $^+$  calcd for  $\text{C}_{15}\text{H}_{19}\text{N}_4\text{OS}$ : 303.1280, found: 303.1280.

### 1-[S-Phenyl-N-(1,3-thiazol-2-yl)sulfonimidoyl]piperidine (**2bq**)

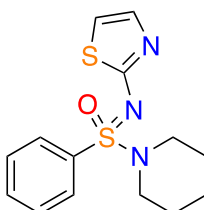

Prepared according to general procedure **A**, from 2-bromo-1,3-thiazole; crude purified by flash column chromatography (KP-NH, 0–40% EtOAc in hexane) to give **2bq** as a colorless oil (55 mg, 45%):  $^1\text{H}$  NMR (400 MHz,  $\text{CDCl}_3$ ):  $\delta$  = 8.01–7.98 (m, 2H), 7.63–7.59 (m, 1H), 7.57–7.53 (m, 2H), 7.34 (d,  $J$  = 3.8 Hz, 1H), 6.79 (d,  $J$  = 3.8 Hz, 1H), 3.12 (t,  $J$  = 5.5 Hz, 4H), 1.64–1.56 (m, 4H), 1.42 ppm (quin,  $J$  = 5.9 Hz, 2H);  $^{13}\text{C}$  NMR (101 MHz,  $\text{CDCl}_3$ ):  $\delta$  = 164.4, 139.1, 135.5, 132.9, 129.0, 127.8, 112.8, 47.2, 25.1, 23.5 ppm; IR (KBr):  $\nu$  = 3067, 2937, 2849, 1439, 1223, 1140, 916  $\text{cm}^{-1}$ ; HRMS (ESI-TOF)  $m/z$  [ $M + H$ ] $^+$  calcd for  $\text{C}_{14}\text{H}_{18}\text{N}_3\text{OS}_2$ : 308.0891, found: 308.0893.

## N-Alkylation of sulfonimidamide 2aa

### General procedure B:<sup>[2]</sup>

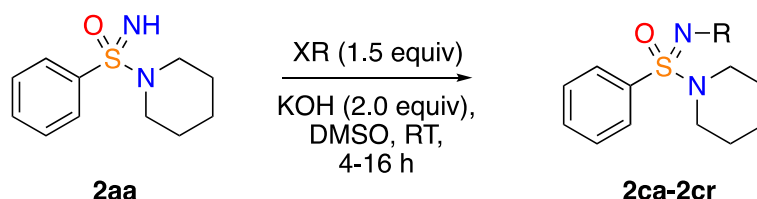

In a dry MW vial flushed with Ar, sulfonimidamide **2aa** (100 mg, 0.45 mmol, 1.0 equiv) and KOH (50 mg, 0.89 mmol, 2.0 equiv) were stirred in DMSO (0.7 mL) at RT for 15 min. Then, an alkyl bromide/iodide (0.67 mmol, 1.5 equiv) was added and the mixture was stirred at RT for 4–16 h. Once the starting material had been consumed (monitored by TLC), H<sub>2</sub>O was added and the aqueous layer was extracted with DCM (3 × 10 mL). The combined organic phases were filtered through water-repellent filter paper. Solvent was removed under reduced pressure and the crude product was purified by flash column chromatography or preparative HPLC.

### 1-(N-Ethyl-S-phenylsulfonimidoyl)piperidine (**2ca**)

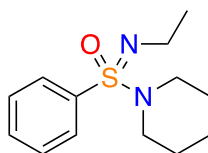

Prepared according to general procedure **B**, from bromoethane; crude purified by flash column chromatography (KP-Sil, 0–50% EtOAc in hexane) to give **2ca** as a colorless oil (111 mg, 99%): <sup>1</sup>H NMR (400 MHz, CDCl<sub>3</sub>): δ = 7.66–7.63 (m, 2H), 7.33–7.24 (m, 3H), 3.10 (dq, *J* = 12.3, 7.2 Hz, 1H), 2.93 (dq, *J* = 12.3, 7.2 Hz, 1H), 2.71 (qt, *J* = 11.7, 5.4 Hz, 4H), 1.39 (quin, *J* = 5.6 Hz, 4H), 1.17 (tt, *J* = 8.3, 4.7 Hz, 2H), 1.06 ppm (t, *J* = 7.2 Hz, 3H); <sup>13</sup>C NMR (101 MHz, CDCl<sub>3</sub>): δ = 136.1, 131.8, 128.5, 127.7, 47.7, 36.8, 25.5, 23.7, 18.3 ppm; IR (KBr): ν = 3063, 2934, 2853, 1254, 1153, 914 cm<sup>-1</sup>; HRMS (ESI-TOF) *m/z* [*M* + H]<sup>+</sup> calcd for C<sub>13</sub>H<sub>21</sub>N<sub>2</sub>OS: 253.1375, found: 253.1379.

### 1-(N-Isopropyl-S-phenylsulfonimidoyl)piperidine (**2cb**)

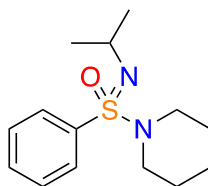

Prepared according to general procedure **B**, from 2-bromopropane; crude purified by flash column chromatography (KP-Sil, 0–30% EtOAc in hexane) to give **2cb** as a colorless oil (46 mg, 38%): <sup>1</sup>H NMR (400 MHz, CDCl<sub>3</sub>): δ = 7.86–7.83 (m, 2H), 7.53–7.44 (m, 3H), 3.77 (hept, *J* = 6.4 Hz, 1H), 2.96–2.87 (m, 4H), 1.60 (quin, *J* = 5.6 Hz, 4H), 1.40–1.34 (m, 2H), 1.25 ppm (dd, *J* = 13.1, 6.4 Hz, 6H); <sup>13</sup>C NMR (101 MHz, CDCl<sub>3</sub>): δ = 136.3, 131.6, 128.5, 127.8, 47.9, 44.5, 26.9, 26.0, 25.5, 23.7 ppm; IR (KBr): ν = 3064, 2933, 2854, 1444, 1263, 1145, 916 cm<sup>-1</sup>; HRMS (ESI-TOF) *m/z* [*M* + H]<sup>+</sup> calcd for C<sub>14</sub>H<sub>23</sub>N<sub>2</sub>OS: 267.1531, found: 267.1533.

### 1-[N-(Cyclobutylmethyl)-S-phenylsulfonimidoyl]piperidine (2cc)

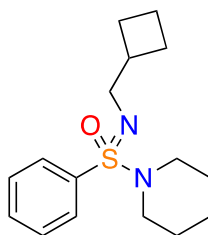

Prepared according to general procedure **B**, from (bromomethyl)cyclobutane; crude purified by flash column chromatography (KP-Sil, 0–30% EtOAc in PE) to give **2cc** as a white solid (80 mg, 61%): m.p. 57–58 °C;  $^1\text{H}$  NMR (400 MHz,  $[\text{D}_6]$ DMSO):  $\delta$  = 7.78–7.75 (m, 2H), 7.65–7.56 (m, 3H), 3.09 (dd,  $J$  = 12.2, 7.0 Hz, 1H), 2.97 (dd,  $J$  = 12.3, 6.7 Hz, 1H), 2.80 (t,  $J$  = 5.4 Hz, 4H), 2.46–2.44 (m, 1H), 2.03–1.94 (m, 2H), 1.87–1.67 (m, 4H), 1.50 (m, 4H), 1.31 ppm (quin,  $J$  = 5.9 Hz, 2H);  $^{13}\text{C}$  NMR (101 MHz,  $[\text{D}_6]$ DMSO):  $\delta$  = 135.8, 132.0, 128.8, 47.2, 46.6, 37.0, 25.3, 25.1, 23.2, 17.7 ppm; IR (KBr):  $\nu$  = 3060, 2924, 2828, 1442, 1263, 1146, 913  $\text{cm}^{-1}$ ; HRMS (ESI-TOF)  $m/z$  [ $M + \text{H}$ ] $^+$  calcd for  $\text{C}_{16}\text{H}_{25}\text{N}_2\text{OS}$ : 293.1682, found: 293.1692.

### 1-[N-(Cyclopentylmethyl)-S-phenylsulfonimidoyl]piperidine (2cd)

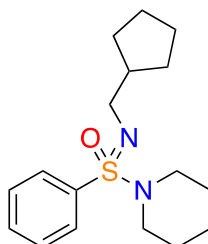

Prepared according to general procedure **B**, from (bromomethyl)cyclopentane; crude purified by flash column chromatography (KP-Sil, 0–30% EtOAc in hexane) to give **2cd** as a colorless oil (40 mg, 29%):  $^1\text{H}$  NMR (400 MHz,  $[\text{D}_6]$ DMSO):  $\delta$  = 7.78–7.76 (m, 2H), 7.65–7.56 (m, 3H), 3.00 (dd,  $J$  = 12.0, 6.9 Hz, 1H), 2.87 (dd,  $J$  = 12.0, 6.9 Hz, 1H), 2.80 (t,  $J$  = 5.4 Hz, 4H), 2.05 (hept,  $J$  = 7.3 Hz, 1H), 1.76–1.64 (m, 2H), 1.59–1.46 (m, 8H), 1.35–1.27 ppm (m, 4H);  $^{13}\text{C}$  NMR (101 MHz,  $[\text{D}_6]$ DMSO):  $\delta$  = 135.9, 132.0, 128.8, 127.4, 47.2, 46.0, 41.6, 30.1, 30.0, 25.1, 25.0, 24.9, 23.2 ppm; IR (KBr):  $\nu$  = 3065, 2937, 2853, 1265, 1146, 916  $\text{cm}^{-1}$ ; HRMS (ESI-TOF)  $m/z$  [ $M + \text{H}$ ] $^+$  calcd for  $\text{C}_{17}\text{H}_{27}\text{N}_2\text{OS}$ : 307.1844, found: 307.1844.

### 1-[N-(Cyclohexylmethyl)-S-phenylsulfonimidoyl]piperidine (2ce)

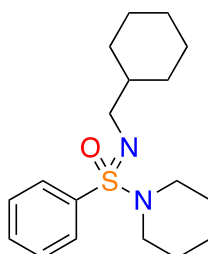

Prepared according to general procedure **B**, from (bromomethyl)cyclohexane; crude purified by flash column chromatography (KP-Sil, 0–30% EtOAc in PE) to give **2ce** as a white solid (102 mg, 71%): m.p. 57–58 °C;  $^1\text{H}$  NMR (400 MHz,  $[\text{D}_6]$ DMSO):  $\delta$  = 7.79–7.76 (m, 2H), 7.65–7.56 (m, 3H), 2.92 (dd,  $J$  = 11.9, 6.5 Hz, 1H), 2.81–2.76 (m, 5H), 1.86–1.75 (m, 2H), 1.71–1.61 (m, 3H), 1.53–1.47 (m, 4H), 1.45–1.37 (m, 1H), 1.34–1.28 (m, 2H), 1.24–1.11 (m, 3H), 0.94 ppm (qd,  $J$  = 12.3, 3.4 Hz, 2H);  $^{13}\text{C}$  NMR (101 MHz,  $[\text{D}_6]$ DMSO):  $\delta$  = 135.9, 132.0, 128.8, 127.4, 47.5, 47.1, 30.8,

26.3, 25.6, 25.1, 23.2 ppm; IR (KBr):  $\nu = 3060, 2923, 2832, 1442, 1265, 1156, 917 \text{ cm}^{-1}$ ; HRMS (ESI-TOF)  $m/z [M + H]^+$  calcd for  $C_{18}H_{29}N_2OS$ : 321.1995, found: 321.2010.

### 1-[S-Phenyl-N-(tetrahydro-2H-pyran-4-ylmethyl)sulfonimidoyl]piperidine (**2cf**)

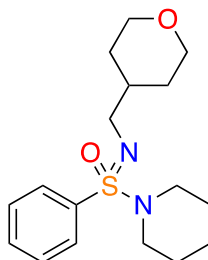

Prepared according to general procedure **B**, from 4-(bromomethyl)tetrahydro-2H-pyran; crude purified by flash column chromatography (KP-Sil, 0–50% EtOAc in hexane) to give **2cf** as a colorless oil (86 mg, 60%):  $^1\text{H NMR}$  (400 MHz,  $\text{CDCl}_3$ ):  $\delta = 7.86\text{--}7.83$  (m, 2H), 7.55–7.45 (m, 3H), 3.99 (ddt,  $J = 10.9, 4.3, 1.8 \text{ Hz}$ , 2H), 3.41 (tdd,  $J = 11.7, 4.7, 2.0 \text{ Hz}$ , 2H), 3.17 (dd,  $J = 12.2, 6.1 \text{ Hz}$ , 1H), 3.00–2.85 (m, 5H), 1.86–1.79 (m, 1H), 1.79–1.73 (m, 1H), 1.60 (quin,  $J = 5.6 \text{ Hz}$ , 5H), 1.43–1.32 ppm (m, 4H);  $^{13}\text{C NMR}$  (101 MHz,  $\text{CDCl}_3$ ):  $\delta = 136.2, 131.8, 128.5, 127.8, 68.0, 47.8, 47.6, 37.6, 31.3, 31.2, 25.5, 23.7 \text{ ppm}$ ; IR (KBr):  $\nu = 3063, 2918, 2833, 1257, 1153, 918 \text{ cm}^{-1}$ ; HRMS (ESI-TOF)  $m/z [M + H]^+$  calcd for  $C_{17}H_{27}N_2O_2S$ : 323.1793, found: 323.1793;

### *tert*-Butyl 4-([oxo(phenyl)(piperidin-1-yl)- $\lambda^6$ -sulfanylidene]amino)methyl)piperidine-1-carboxylate (**2cg**)

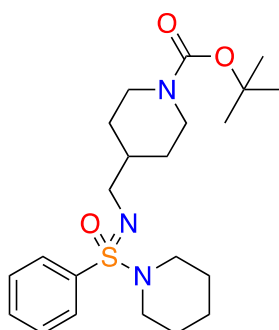

Prepared according to general procedure **B**, from *tert*-butyl 4-(bromomethyl)piperidine-1-carboxylate; crude purified by flash column chromatography (KP-Sil, 0–50% EtOAc in hexane) to give **2cg** as a colorless oil (65 mg, 35%):  $^1\text{H NMR}$  (400 MHz,  $\text{CDCl}_3$ ):  $\delta = 7.85\text{--}7.83$  (m, 2H), 7.55–7.45 (m, 3H), 4.12 (brs, 2H), 3.17 (dd,  $J = 12.1, 6.5 \text{ Hz}$ , 1H), 2.96–2.84 (m, 5H), 2.74–2.67 (m, 2H), 1.90–1.77 (m, 2H), 1.74–1.64 (m, 1H), 1.62–1.57 (m, 4H), 1.45 (s, 9H), 1.41–1.35 (m, 2H), 1.22–1.12 ppm (m, 2H);  $^{13}\text{C NMR}$  (101 MHz,  $\text{CDCl}_3$ ):  $\delta = 155.0, 136.2, 131.8, 128.6, 127.8, 79.1, 47.6, 47.5, 38.7, 30.3, 28.5, 25.5, 23.7 \text{ ppm}$ ; IR (KBr):  $\nu = 3061, 2934, 2918, 2847, 2839, 1690, 1246, 1134, 922 \text{ cm}^{-1}$ ; HRMS (ESI-TOF)  $m/z [M + H]^+$  calcd for  $C_{22}H_{36}N_3O_3S$ : 422.2477, found: 422.2474.

***tert*-Butyl 3-[[oxo(phenyl)(piperidin-1-yl)- $\lambda^6$ -sulfanylidene]amino]propylcarbamate (**2ch**)**

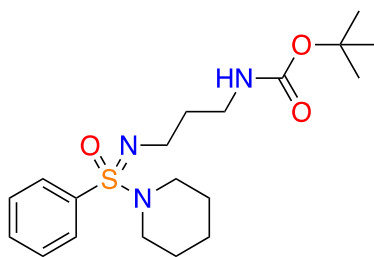

Prepared according to general procedure **B**, from *tert*-butyl 3-bromopropylcarbamate; crude purified by flash column chromatography (KP-Sil, 0–50% EtOAc in hexane) to give **2ch** as a colorless oil (86 mg, 50%):  $^1\text{H}$  NMR (400 MHz,  $\text{CDCl}_3$ ):  $\delta$  = 7.84–7.82 (m, 2H), 7.55–7.45 (m, 3H), 5.33 (brs, 1H), 3.38–3.24 (m, 3H), 3.12 (dt,  $J$  = 12.4, 6.1 Hz, 1H), 2.99–2.85 (m, 4H), 1.76 (m, 2H), 1.59 (quin,  $J$  = 5.6 Hz, 4H), 1.42–1.34 ppm (m, 11H);  $^{13}\text{C}$  NMR (101 MHz,  $\text{CDCl}_3$ ):  $\delta$  = 156.0, 136.0, 131.9, 128.6, 78.6, 47.6, 39.9, 39.4, 31.5, 28.4, 25.5, 23.7 ppm; IR (KBr):  $\nu$  = 3360, 3063, 2934, 2853, 1707, 1250, 1153, 918  $\text{cm}^{-1}$ ; HRMS (ESI-TOF)  $m/z$  [ $M + \text{H}$ ] $^+$  calcd for  $\text{C}_{19}\text{H}_{32}\text{N}_3\text{O}_3\text{S}$ : 382.2164, found: 382.2164.

**1- $\{N$ -[(*S*)-3,7-Dimethyloct-6-en-1-yl]-*S*-phenylsulfonimidoyl]piperidine (**2ci**)**

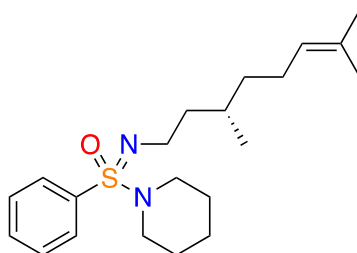

Prepared according to general procedure **B**, from (*S*)-8-bromo-2,6-dimethyloct-2-ene; crude purified by flash column chromatography (KP-Sil, 0–50% EtOAc in hexane) to give **2ci**, a mixture of diastereoisomers, as a colorless oil (75 mg, 46%):  $^1\text{H}$  NMR (400 MHz,  $\text{CDCl}_3$ ):  $\delta$  = 7.86–7.84 (m, 2H), 7.54–7.45 (m, 3H), 5.11 (tdt,  $J$  = 5.7, 2.8, 1.4 Hz, 1H), 3.26 (dddd,  $J$  = 23.4, 12.3, 8.9, 5.9 Hz, 1H), 3.10 (dddd,  $J$  = 25.2, 12.2, 8.9, 6.0 Hz, 1H), 2.91 (qt,  $J$  = 11.6, 5.4 Hz, 4H), 2.04–1.98 (m, 2H), 1.71–1.56 (m, 12H), 1.52–1.33 (m, 4H), 1.23–1.13 (m, 1H), 0.92 ppm (dd,  $J$  = 6.6, 2.0 Hz, 3H);  $^{13}\text{C}$  NMR (101 MHz,  $\text{CDCl}_3$ ):  $\delta$  = 136.3, 131.7, 131.0, 131.0, 128.5, 127.8, 125.1, 125.0, 47.7, 40.1, 40.0, 39.9, 37.2, 30.6, 30.4, 25.7, 25.6, 25.5, 23.8, 19.6, 17.7 ppm; IR (KBr):  $\nu$  = 3065, 2918, 2851, 1445, 1263, 1151, 918  $\text{cm}^{-1}$ ; HRMS (ESI-TOF)  $m/z$  [ $M + \text{H}$ ] $^+$  calcd for  $\text{C}_{21}\text{H}_{35}\text{N}_2\text{OS}$ : 363.2470, found: 363.2469.

**1- $\{N$ -(2-Methoxyethyl)-*S*-phenylsulfonimidoyl]piperidine (**2cj**)**

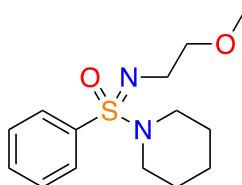

Prepared according to general procedure **B**, from 1-bromo-2-methoxyethane; crude purified by flash column chromatography (KP-Sil, 0–50% EtOAc in PE) to give **2cj** as a yellow oil (100 mg, 80%):  $^1\text{H}$  NMR (400 MHz,  $\text{CDCl}_3$ ):  $\delta$  = 7.87–7.85 (m, 2H), 7.55–7.45 (m, 3H), 3.61–3.57 (m, 2H), 3.47–3.41 (m, 1H), 3.40 (s, 3H), 3.27 (dt,  $J$  = 12.6, 6.6 Hz, 1H), 2.95–2.91 (m, 4H), 1.60 (quin,  $J$  = 5.7 Hz, 4H), 1.40–1.34 ppm (m, 2H);  $^{13}\text{C}$  NMR (101 MHz,  $\text{CDCl}_3$ ):  $\delta$  = 136.1, 132.0, 128.7, 128.0,

74.4, 59.0, 47.8, 41.7, 25.7, 23.9 ppm; IR (KBr):  $\nu = 3063, 2933, 2852, 1445, 1291, 1156, 1118, 917 \text{ cm}^{-1}$ ; HRMS (ESI-TOF)  $m/z [M + H]^+$  calcd for  $C_{14}H_{23}N_2O_2S$ : 283.1475, found: 283.1489.

### Ethyl 2-[[oxo(phenyl)(piperidin-1-yl)- $\lambda^6$ -sulfanylidene]amino]acetate (**2ck**)

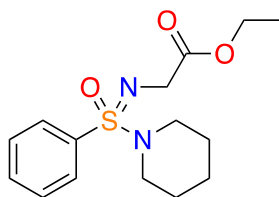

Prepared according to general procedure **B**, from ethyl bromoacetate; crude purified by flash column chromatography (KP-Sil, 0–50% EtOAc in PE) to give **2ck** as a yellow oil (56 mg, 40%):  $^1\text{H}$  NMR (400 MHz,  $\text{CDCl}_3$ ):  $\delta = 7.93\text{--}7.91$  (m, 2H),  $7.57\text{--}7.47$  (m, 3H), 4.22 (tdd,  $J = 8.2, 6.7, 1.1$  Hz, 2H), 4.00 (d,  $J = 17.6$  Hz, 1H), 3.95 (d,  $J = 17.4$  Hz, 1H), 3.01 (dt,  $J = 11.2, 5.5$  Hz, 2H), 2.93 (dt,  $J = 11.6, 5.5$  Hz, 2H), 1.62–1.56 (m, 4H), 1.39 (q,  $J = 6.2$  Hz, 2H), 1.29 ppm (t,  $J = 7.1$  Hz, 3H);  $^{13}\text{C}$  NMR (101 MHz,  $\text{CDCl}_3$ ):  $\delta = 172.3, 135.7, 132.3, 128.8, 128.1, 60.9, 47.7, 43.8, 25.6, 23.8, 14.4$  ppm; IR (neat):  $\nu = 3061, 2935, 1747, 1295, 1156, 920 \text{ cm}^{-1}$ ; HRMS (ESI-TOF)  $m/z [M + H]^+$  calcd for  $C_{15}H_{23}N_2O_3S$ : 311.1424, found: 311.1421.

### *N,N*-Diethyl-2-[[oxo(phenyl)(piperidin-1-yl)- $\lambda^6$ -sulfanylidene]amino]ethanamine (**2cl**)

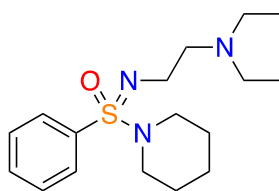

Prepared according to general procedure **B**, from *N*-(2-bromoethyl)-*N,N*-diethylamine; crude purified by preparative HPLC to give **2cl** as a colorless oil (20 mg, 13%):  $^1\text{H}$  NMR (400 MHz,  $\text{CDCl}_3$ ):  $\delta = 7.86\text{--}7.84$  (m, 2H),  $7.54\text{--}7.45$  (m, 3H), 3.40–3.33 (m, 1H), 3.20–3.13 (m, 1H), 2.97–2.87 (m, 4H), 2.74 (t,  $J = 8.0$  Hz, 2H), 2.61 (q,  $J = 7.1$  Hz, 4H), 1.60 (quin,  $J = 5.6$  Hz, 4H), 1.38 (m, 2H), 1.06 ppm (t,  $J = 7.1$  Hz, 6H);  $^{13}\text{C}$  NMR (101 MHz,  $\text{CDCl}_3$ ):  $\delta = 136.1, 131.9, 128.6, 127.8, 55.3, 47.7, 40.3, 25.6, 23.7, 11.9$  ppm; IR (KBr):  $\nu = 3063, 2934, 2853, 1265, 1151, 918 \text{ cm}^{-1}$ ; HRMS (ESI-TOF)  $m/z [M + H]^+$  calcd for  $C_{17}H_{30}N_3OS$ : 324.2110, found: 324.2108.

### 1-(*N*-Methyl-*S*-phenylsulfonimidoyl)piperidine (**2cm**)

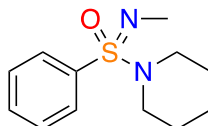

Prepared according to general procedure **B**, from methyl iodide (95 mg, 0.67 mmol, 1.5 equiv); crude purified by flash column chromatography (KP-Sil, 0–50% EtOAc in hexane) to give **2cm** as a white solid (63 mg, 59%): m.p. 100–102 °C;  $^1\text{H}$  NMR (400 MHz,  $\text{CDCl}_3$ ):  $\delta = 7.86\text{--}7.83$  (m, 2H),  $7.55\text{--}7.45$  (m, 3H), 2.98–2.85 (m, 4H), 2.85 (s, 3H), 1.61 (dt,  $J = 11.5, 5.6$  Hz, 4H), 1.44–1.35 ppm (m, 2H);  $^{13}\text{C}$  NMR (101 MHz,  $\text{CDCl}_3$ ):  $\delta = 136.0, 131.9, 128.6, 127.7, 47.5, 27.9, 25.5, 23.7$  ppm; IR (KBr):  $\nu = 2970, 2935, 2812, 1265, 1149, 918 \text{ cm}^{-1}$ ; HRMS (ESI-TOF)  $m/z [M + H]^+$  calcd for  $C_{12}H_{19}N_2OS$ : 239.1218, found: 239.1218.

### 1-(*N*-Benzyl-*S*-phenylsulfonimidoyl)piperidine (**2cn**)

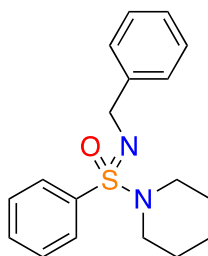

Prepared according to general procedure **B**, from benzyl bromide; crude purified by flash column chromatography (KP-Sil, 0–40% EtOAc in hexane) to give **2cn** as a colorless oil (80 mg, 57%):  $^1\text{H}$  NMR (400 MHz,  $\text{CDCl}_3$ ):  $\delta$  = 7.72–7.69 (m, 2H), 7.34–7.26 (m, 5H), 7.13–7.09 (m, 2H), 7.03–6.98 (m, 1H), 4.28 (d,  $J$  = 14.8 Hz, 1H), 4.11 (d,  $J$  = 14.8 Hz, 1H), 2.77–2.64 (m, 4H), 1.38–1.30 (m, 4H), 1.17–1.12 ppm (m, 2H);  $^{13}\text{C}$  NMR (101 MHz,  $\text{CDCl}_3$ ):  $\delta$  = 141.8, 136.2, 132.0, 128.7, 128.3, 128.0, 127.6, 126.5, 47.8, 45.5, 25.6, 23.8 ppm; IR (KBr):  $\nu$  = 3063, 2937, 1445, 1269, 1151, 924  $\text{cm}^{-1}$ ; HRMS (ESI-TOF)  $m/z$  [ $M + \text{H}$ ] $^+$  calcd for  $\text{C}_{18}\text{H}_{23}\text{N}_2\text{OS}$ : 315.1531, found: 315.1534.

### 5-Methyl-3-([oxo(phenyl)(piperidin-1-yl)- $\lambda^6$ -sulfanylidene]amino)methyl)isoxazole (**2co**)

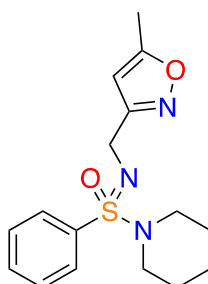

Prepared according to general procedure **B**, from 3-(bromomethyl)-5-methylisoxazole; crude purified by flash column chromatography (KP-Sil, 0–50% EtOAc in hexane) to give **2co** as a colorless oil (88 mg, 62%):  $^1\text{H}$  NMR (400 MHz,  $\text{CDCl}_3$ ):  $\delta$  = 7.89–7.86 (m, 2H), 7.57–7.53 (m, 1H), 7.51–7.47 (m, 2H), 6.16 (s, 1H), 4.41 (d,  $J$  = 14.8 Hz, 1H), 4.33 (d,  $J$  = 14.9 Hz, 1H), 2.99–2.88 (m, 4H), 2.39 (s, 3H), 1.60 (quin,  $J$  = 5.5 Hz, 4H), 1.41–1.35 ppm (m, 2H);  $^{13}\text{C}$  NMR (101 MHz,  $\text{CDCl}_3$ ):  $\delta$  = 169.1, 164.7, 135.8, 132.3, 128.8, 128.0, 101.8, 47.8, 37.6, 25.6, 23.8, 12.4 ppm; IR (KBr):  $\nu$  = 3063, 2935, 2849, 1607, 1445, 1283, 1263, 1148, 918  $\text{cm}^{-1}$ ; HRMS (ESI-TOF)  $m/z$  [ $M + \text{H}$ ] $^+$  calcd for  $\text{C}_{16}\text{H}_{22}\text{N}_3\text{O}_2\text{S}$ : 320.1433, found: 320.1434.

### 1-(*N*-Allyl-*S*-phenylsulfonimidoyl)piperidine (**2cp**)

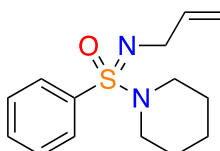

Prepared according to general procedure **B**, from allyl bromide; crude purified by flash column chromatography (KP-Sil, 0–30% EtOAc in hexane) to give **2cp** as a yellow oil (85 mg, 72%):  $^1\text{H}$  NMR (400 MHz,  $\text{CDCl}_3$ ):  $\delta$  = 7.90–7.87 (m, 2H), 7.56–7.46 (m, 3H), 6.04 (ddt,  $J$  = 17.0, 10.4, 5.3 Hz, 1H), 5.36 (dq,  $J$  = 17.0, 1.8 Hz, 1H), 5.09 (dq,  $J$  = 10.1, 1.7 Hz, 1H), 3.89 (ddt,  $J$  = 15.5, 5.0, 1.8 Hz, 1H), 3.77 (ddt,  $J$  = 15.6, 5.7, 1.6 Hz, 1H), 2.98–2.88 (m, 4H), 1.60 (dt,  $J$  = 11.5, 5.6 Hz, 4H), 1.41–1.35 ppm (m, 2H);  $^{13}\text{C}$  NMR (101 MHz,  $\text{CDCl}_3$ ):  $\delta$  = 138.1, 136.3, 132.0, 128.7, 128.0, 114.3, 47.8, 44.5, 25.6, 23.8 ppm; IR (KBr):  $\nu$  = 3067, 2935, 2833, 1445, 1269, 1153, 914  $\text{cm}^{-1}$ ; HRMS (ESI-TOF)  $m/z$  [ $M + \text{H}$ ] $^+$  calcd for  $\text{C}_{14}\text{H}_{21}\text{N}_2\text{OS}$ : 265.1375, found: 265.1374.



### 1-[S-Phenyl-N-(prop-2-yn-1-yl)sulfonimidoyl]piperidine (2cq)

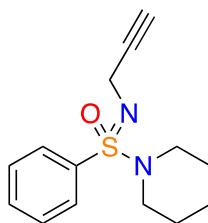

Prepared according to general procedure **B**, from propargyl bromide; crude purified by flash column chromatography (KP-Sil, 0–50% EtOAc in hexane) to give **2cq** as a yellow oil (74 mg, 63%):  $^1\text{H}$  NMR (400 MHz,  $\text{CDCl}_3$ ):  $\delta$  = 7.90–7.87 (m, 2H), 7.57–7.47 (m, 3H), 4.07–3.94 (m, 2H), 2.97 (ddt,  $J$  = 12.0, 10.1, 6.3 Hz, 4H), 2.22 (t,  $J$  = 2.5 Hz, 1H), 1.69–1.56 (m, 4H), 1.39 ppm (quin,  $J$  = 5.9 Hz, 2H);  $^{13}\text{C}$  NMR (101 MHz,  $\text{CDCl}_3$ ):  $\delta$  = 135.4, 132.1, 128.6, 127.7, 83.2, 69.7, 47.7, 30.8, 25.4, 23.6 ppm; IR (KBr):  $\nu$  = 3267, 2937, 2841, 1445, 1269, 1230, 1144, 916  $\text{cm}^{-1}$ ; HRMS (ESI-TOF)  $m/z$  [ $M + \text{H}$ ] $^+$  calcd for  $\text{C}_{14}\text{H}_{19}\text{N}_2\text{OS}$ : 263.1218, found: 263.1219.

### 1-[N-(But-2-yn-1-yl)-S-phenylsulfonimidoyl]piperidine (2cr)

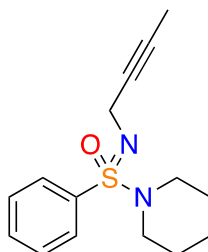

Prepared according to general procedure **B**, from 1-bromobut-2-yne; crude purified by flash column chromatography (KP-Sil, 0–50% EtOAc in hexane) to give **2cr** as a yellow oil (87 mg, 71%):  $^1\text{H}$  NMR (400 MHz,  $\text{CDCl}_3$ ):  $\delta$  = 7.90–7.87 (m, 2H), 7.56–7.46 (m, 3H), 3.96 (quin,  $J$  = 2.4 Hz, 2H), 2.97 (m, 4H), 1.83 (t,  $J$  = 2.5 Hz, 3H), 1.65–1.59 (m, 4H), 1.42–1.36 ppm (m, 2H);  $^{13}\text{C}$  NMR (101 MHz,  $\text{CDCl}_3$ ):  $\delta$  = 135.6, 132.0, 128.6, 127.8, 78.2, 47.8, 31.2, 25.5, 23.7, 3.8 ppm; IR (KBr):  $\nu$  = 3063, 2937, 2851, 1672, 1445, 1230, 1149, 916  $\text{cm}^{-1}$ ; HRMS (ESI-TOF)  $m/z$  [ $M + \text{H}$ ] $^+$  calcd for  $\text{C}_{15}\text{H}_{21}\text{N}_2\text{OS}$ : 277.1375, found: 277.1376.

## N-Trifluoromethylation of sulfonimidamide **2aa**<sup>[3]</sup>

### 1-[S-Phenyl-N-(trifluoromethyl)sulfonimidoyl]piperidine (**2cs**)

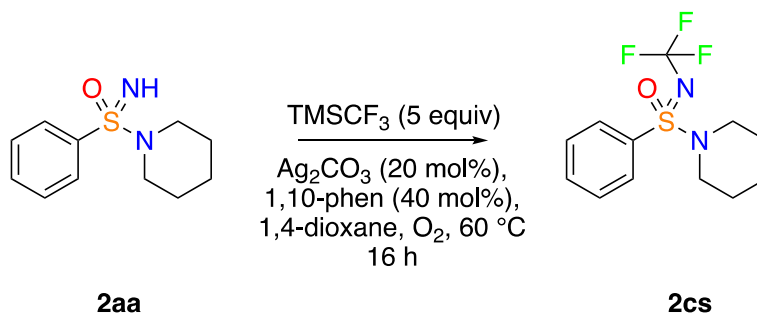

In a MW vial charged with sulfonimidamide **2aa** (100 mg, 0.45 mmol, 1.0 equiv), TMSCF<sub>3</sub> (4.44 mL, 2.22 mmol, 5.0 equiv; 0.5 M solution in THF), Ag<sub>2</sub>CO<sub>3</sub> (24 mg, 0.09 mmol, 0.2 equiv), 1,10-phenanthroline (32 mg, 0.18 mmol, 0.4 equiv) and 1,4-dioxane (8.9 mL) were added. Then, a balloon charged with O<sub>2</sub> was attached to the MW vial and the solution was degassed for 10 min. The mixture was stirred and heated in an oil bath at 60 °C for 16 h. Then, the solution was cooled, solvent removed in vacuo and the crude product purified by flash column chromatography (KP-Sil, 0–50% EtOAc in PE) to give **2cs** as a yellow oil (57 mg, 44%): <sup>1</sup>H NMR (400 MHz, CDCl<sub>3</sub>): δ = 7.89–7.86 (m, 2H), 7.65–7.60 (m, 1H), 7.57–7.53 (m, 2H), 3.11–3.00 (m, 4H), 1.68–1.62 (m, 4H), 1.48–1.42 ppm (m, 2H); <sup>13</sup>C NMR (101 MHz, CDCl<sub>3</sub>): δ = 135.6, 133.3, 129.2, 127.5, 121.6 (q, *J* = 255 Hz), 47.5, 25.3, 23.7 ppm; IR (neat): ν = 3069, 2944, 2856, 1256, 1077, 921 cm<sup>-1</sup>; HRMS (ESI-TOF) *m/z* [*M* + H]<sup>+</sup> calcd for C<sub>12</sub>H<sub>16</sub>N<sub>2</sub>OF<sub>3</sub>S: 293.0930, found: 293.0935.

## N-Cyanation of sulfonimidamide **2aa**<sup>[4]</sup>

### *N*-[Oxo(phenyl)(piperidin-1-yl)- $\lambda^6$ -sulfanylidene]cyanamide (**2da**)

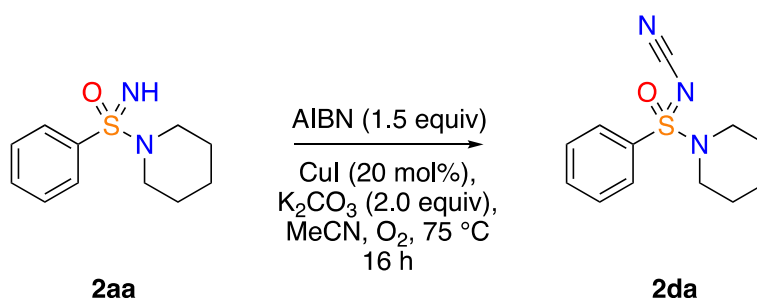

In a MW vial charged with sulfonimidamide **2aa** (100 mg, 0.45 mmol, 1.0 equiv), AIBN (108 mg, 0.66 mmol, 1.5 equiv), CuI (16 mg, 0.09 mmol, 0.2 equiv), K<sub>2</sub>CO<sub>3</sub> (122 mg, 0.88 mmol, 2.0 equiv) and MeCN (6.7 mL) were added. Then, a balloon charged with O<sub>2</sub> was attached to the MW vial and the solution was degassed for 10 min. The mixture was stirred and heated in an oil bath at 75 °C for 16 h. Then, the solution was cooled, filtered and the solids washed with MeCN. The liquid phase was collected, solvent removed in vacuo and the crude product purified by flash column chromatography (KP-Sil, 0–100% EtOAc in PE) to give **2da** as a brown oil (47 mg, 43%): <sup>1</sup>H NMR (400 MHz, CDCl<sub>3</sub>):  $\delta$  = 7.87–7.84 (m, 2H), 7.72–7.67 (m, 1H), 7.62–7.57 (m, 2H), 3.14 (td, *J* = 5.6, 2.2 Hz, 4H), 1.77–1.63 (m, 4H), 1.54–1.46 ppm (m, 2H); <sup>13</sup>C NMR (101 MHz, CDCl<sub>3</sub>):  $\delta$  = 134.4, 133.6, 129.7, 127.8, 111.2, 47.4, 25.1, 23.4 ppm; IR (neat):  $\nu$  = 3063, 2924, 2853, 2151, 1268, 1200, 924 cm<sup>-1</sup>; HRMS (ESI-TOF) *m/z* [*M* + H]<sup>+</sup> calcd for C<sub>12</sub>H<sub>16</sub>N<sub>3</sub>OS: 250.1009, found: 250.1011.

## N-Sulfonylation of sulfonimidamide 2aa

### General procedure C:

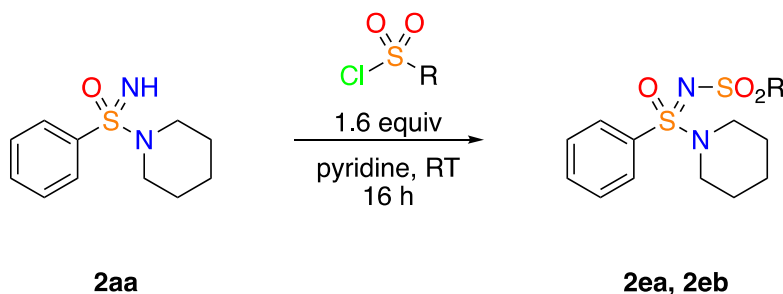

Sulfonimidamide **2aa** (100 mg, 0.45 mmol, 1.0 equiv) was dissolved in pyridine (3.0 mL) under Ar atmosphere; then, the appropriate sulfonyl chloride (0.71 mmol, 1.6 equiv) was added. The reaction mixture was stirred at RT overnight; then, the reaction was quenched with aqueous NaHCO<sub>3</sub> and diluted with EtOAc (3 mL). The mixture was transferred to a separating funnel, the aqueous layer was extracted with EtOAc (3 × 10 mL), and the combined organic phases were washed with brine (3 × 10 mL), then filtered through water-repellent filter paper. Solvent was removed in vacuo and the crude product purified (when needed).

### N-[Oxo(phenyl)(piperidin-1-yl)-λ<sup>6</sup>-sulfanylidene]methanesulfonamide (2ea)

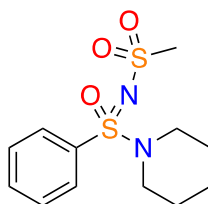

Prepared according to general procedure **C**, from methanesulfonyl chloride; crude purified by preparative HPLC to give **2ea** as a white solid (83 mg, 62%): m.p. 93–95 °C; <sup>1</sup>H NMR (400 MHz, CDCl<sub>3</sub>): δ = 7.92–7.90 (m, 2H), 7.67–7.63 (m, 1H), 7.59–7.54 (m, 2H), 3.23 (ddd, *J* = 11.4, 7.1, 4.0 Hz, 2H), 3.18 (s, 3H), 3.10 (ddd, *J* = 11.5, 6.9, 3.9 Hz, 2H), 1.74–1.60 (m, 4H), 1.49 ppm (quin, *J* = 5.9 Hz, 2H); <sup>13</sup>C NMR (101 MHz, CDCl<sub>3</sub>): δ = 136.1, 133.7, 129.4, 127.6, 47.2, 45.0, 25.1, 23.5 ppm; IR (KBr): ν = 2939, 2856, 1311, 1246, 1099, 918 cm<sup>-1</sup>; HRMS (ESI-TOF) *m/z* [*M* + H]<sup>+</sup> calcd for C<sub>12</sub>H<sub>19</sub>N<sub>2</sub>O<sub>3</sub>S<sub>2</sub>: 303.0837, found: 303.0838.

### 4-Methyl-N-[oxo(phenyl)(piperidin-1-yl)-λ<sup>6</sup>-sulfanylidene]benzenesulfonamide (2eb)

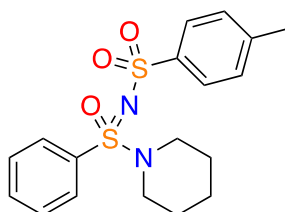

Prepared according to general procedure **C**, from *p*-toluenesulfonyl chloride; after workup, the <sup>1</sup>H NMR spectrum indicated clean formation of **2eb** as a yellow solid (97 mg, 58%): m.p. 124–126 °C; <sup>1</sup>H NMR (400 MHz, CDCl<sub>3</sub>): δ = 7.90–7.84 (m, 4H), 7.63–7.59 (m, 1H), 7.54–7.49 (m, 2H), 7.26–7.24 (m, 2H), 3.24–3.18 (m, 2H), 3.11–3.05 (m, 2H), 2.39 (s, 3H), 1.69–1.59 (m, 4H), 1.47 ppm (quin, *J* = 5.7 Hz, 2H); <sup>13</sup>C NMR (101 MHz, CDCl<sub>3</sub>): δ = 142.8, 141.0, 136.2, 133.5, 129.3, 129.2, 127.7, 126.9, 47.2, 25.1, 23.6, 21.7 ppm; IR (neat): ν = 3063, 2936, 2857, 1312, 1257, 1155, 1112,

1088, 922  $\text{cm}^{-1}$ ; HRMS (ESI-TOF)  $m/z$  [ $M + H$ ] $^+$  calcd for  $\text{C}_{18}\text{H}_{23}\text{N}_2\text{O}_3\text{S}_2$ : 379.1145, found: 379.1151.

## N-Alkoxy-carbonylation of sulfonimidamide **2aa** (carbamate formation)<sup>[5]</sup>

### General procedure D:

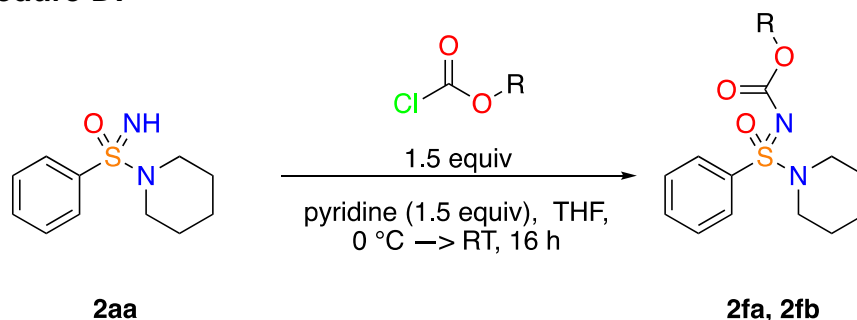

To a solution of sulfonimidamide **2aa** (100 mg, 0.45 mmol, 1.0 equiv) and pyridine (54  $\mu$ L, 0.67 mmol, 1.5 equiv) in THF (0.9 mL) under Ar atmosphere at 0 °C, the corresponding chloroformate (0.67 mmol, 1.5 equiv) was added. As soon as the chloroformate was in solution, a white precipitate formed. The temperature was allowed to rise to RT and the mixture was stirred overnight. The reaction was quenched with H<sub>2</sub>O and diluted with Et<sub>2</sub>O (3 mL). The mixture was transferred to a separating funnel, the aqueous layer was extracted with Et<sub>2</sub>O (3  $\times$  10 mL), and the combined organic phases were washed with 1 M HCl (3  $\times$  10 mL) and brine (3  $\times$  10 mL), then filtered through water-repellent filter paper. Solvent was removed in vacuo and the crude product purified (when needed).

### Phenyl [oxo(phenyl)(piperidin-1-yl)- $\lambda^6$ -sulfanylidene]carbamate (**2fa**)

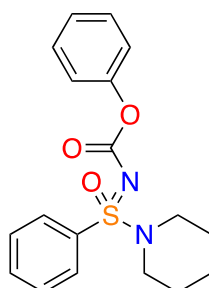

Prepared according to general procedure **D**, from phenyl chloroformate; crude purified by flash column chromatography (KP-Sil, 0–50% EtOAc in PE) to give **2fa** as a white solid (90 mg, 60%): m.p. 114–117 °C; <sup>1</sup>H NMR (400 MHz, CDCl<sub>3</sub>):  $\delta$  = 7.94–7.91 (m, 2H), 7.65–7.60 (m, 1H), 7.58–7.53 (m, 2H), 7.34–7.29 (m, 2H), 7.17–7.11 (m, 3H), 3.25–3.15 (m, 4H), 1.66 (quin,  $J$  = 5.6 Hz, 4H), 1.53–1.47 ppm (m, 2H); <sup>13</sup>C NMR (101 MHz, CDCl<sub>3</sub>):  $\delta$  = 156.1, 151.8, 136.2, 133.4, 129.3, 129.2, 127.9, 125.3, 121.8, 46.7, 25.3, 23.7 ppm; IR (neat):  $\nu$  = 3068, 2945, 2856, 1687, 1274, 1248, 1194, 877 cm<sup>-1</sup>; HRMS (ESI-TOF)  $m/z$  [ $M$  + H]<sup>+</sup> calcd for C<sub>18</sub>H<sub>21</sub>N<sub>2</sub>O<sub>3</sub>S: 345.1267, found: 345.1275.

### Ethyl [oxo(phenyl)(piperidin-1-yl)- $\lambda^6$ -sulfanylidene]carbamate (**2fb**)

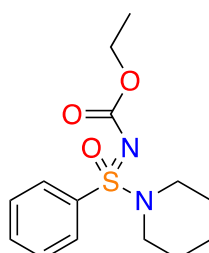

Prepared according to general procedure **D**, from ethyl chloroformate; after workup, the  $^1\text{H}$  NMR spectrum indicated clean formation of **2fb** as a yellow solid (90 mg, 69%): m.p. 75–76 °C;  $^1\text{H}$  NMR (400 MHz,  $\text{CDCl}_3$ ):  $\delta$  = 7.90–7.86 (m, 2H), 7.62–7.58 (m, 1H), 7.56–7.51 (m, 2H), 4.11 (qd,  $J$  = 7.1, 1.6 Hz, 2H), 3.14 (td,  $J$  = 5.0, 3.0 Hz, 4H), 1.64 (quin,  $J$  = 5.7 Hz, 4H), 1.50–1.43 (m, 2H), 1.23 ppm (t,  $J$  = 7.1 Hz, 3H);  $^{13}\text{C}$  NMR (101 MHz,  $\text{CDCl}_3$ ):  $\delta$  = 157.9, 136.4, 133.1, 129.2, 127.8, 62.0, 46.7, 25.3, 23.7, 14.5 ppm; IR (neat):  $\nu$  = 2946, 1668, 1252, 885  $\text{cm}^{-1}$ ; HRMS (ESI-TOF)  $m/z$  [ $M + \text{H}$ ] $^+$  calcd for  $\text{C}_{14}\text{H}_{21}\text{N}_2\text{O}_3\text{S}$ : 297.1267, found: 297.1278.

## N-Aminocarbonylation of sulfonimidamide **2aa** (urea formation)<sup>[6]</sup>

### General procedure E:

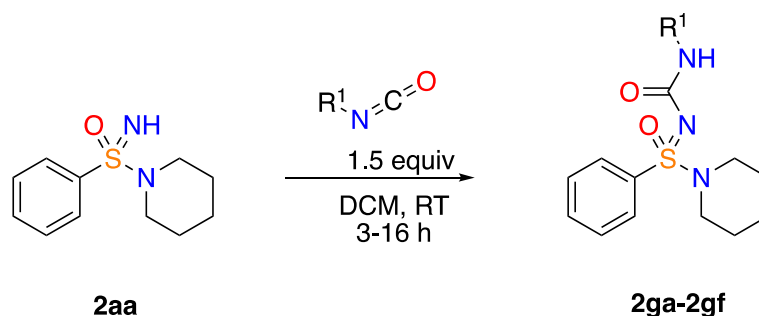

To a solution of sulfonimidamide **2aa** (100 mg, 0.45 mmol, 1.0 equiv) in anhydrous DCM (0.9 mL), the corresponding isocyanate (0.66 mmol, 1.5 equiv) was added dropwise at RT under Ar atmosphere. The reaction mixture was stirred until a precipitate formed (3–16 h) and starting material had been consumed (TLC analysis). Et<sub>2</sub>O was added, and the precipitate was collected by filtration under reduced pressure and washed with Et<sub>2</sub>O. The solid was purified by flash column chromatography (when needed).

### 1-[Oxo(phenyl)(piperidin-1-yl)-λ<sup>6</sup>-sulfanylidene]-3-propylurea (**2ga**)

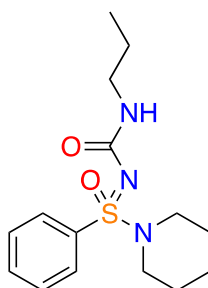

Prepared according to general procedure **E**, from *n*-propyl isocyanate; crude purified by flash column chromatography (KP-Sil, 0–100% EtOAc in PE) to give **2ga** as a colorless oil (89 mg, 65%): <sup>1</sup>H NMR (400 MHz, CDCl<sub>3</sub>): δ = 7.87 (dt, *J* = 8.4, 1.3 Hz, 2H), 7.59–7.55 (m, 1H), 7.51 (ddd, *J* = 8.3, 6.5, 1.2 Hz, 2H), 5.16 (brs, 1H), 3.17–3.06 (m, 6H), 1.63 (quin, *J* = 5.4 Hz, 4H), 1.55–1.42 (m, 4H), 0.92–0.88 ppm (m, 3H); <sup>13</sup>C NMR (101 MHz, CDCl<sub>3</sub>): δ = 158.4, 137.1, 132.7, 129.0, 127.7, 46.9, 42.4, 25.4, 23.7, 23.3, 11.5 ppm; IR (neat): ν = 3252, 2931, 2855, 1617, 1520, 1244, 931 cm<sup>-1</sup>; HRMS (ESI-TOF) *m/z* [*M* + *H*]<sup>+</sup> calcd for C<sub>15</sub>H<sub>24</sub>N<sub>3</sub>O<sub>2</sub>S: 310.1584, found: 310.1602.

### 1-[Oxo(phenyl)(piperidin-1-yl)-λ<sup>6</sup>-sulfanylidene]-3-phenylurea (**2gb**)

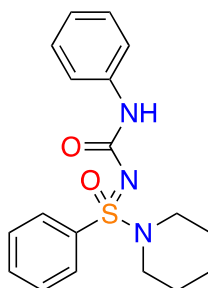

Prepared according to general procedure **E**, from phenyl isocyanate; crude purified by flash column chromatography (KP-Sil, 0–50% EtOAc in PE) to give **2gb** as a white solid (120 mg, 79%): m.p. 187–189 °C; <sup>1</sup>H NMR (400 MHz, CDCl<sub>3</sub>): δ = 7.93–7.90 (m, 2H), 7.63–7.58 (m, 1H), 7.57–



7.52 (m, 2H), 7.45–7.42 (m, 2H), 7.28–7.24 (m, 3H), 7.02–6.98 (m, 1H), 3.21–3.11 (m, 4H), 1.66 (quin,  $J = 5.6$  Hz, 4H), 1.51–1.45 ppm (m, 2H);  $^{13}\text{C}$  NMR (101 MHz,  $\text{CDCl}_3$ ):  $\delta = 139.3, 136.9, 133.0, 129.2, 129.0, 127.8, 122.9, 46.3, 25.4, 23.7$  ppm; IR (neat):  $\nu = 3296, 2940, 2844, 1632, 1540, 1438, 1235, 939$   $\text{cm}^{-1}$ ; HRMS (ESI-TOF)  $m/z$  [ $M + \text{H}$ ] $^+$  calcd for  $\text{C}_{18}\text{H}_{22}\text{N}_3\text{O}_2\text{S}$ : 344.1438, found: 344.1427.

### 1-(4-Nitrophenyl)-3-[oxo(phenyl)(piperidin-1-yl)- $\lambda^6$ -sulfanylidene]urea (**2gc**)

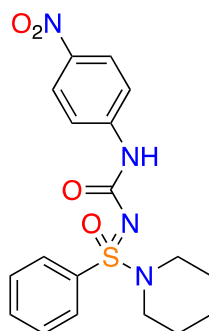

Prepared according to general procedure **E**, from 4-nitrophenyl isocyanate; after workup, the  $^1\text{H}$  NMR spectrum indicated clean formation of **2gc** as a yellow solid (141 mg, 82%): m.p.  $>207$   $^\circ\text{C}$ ;  $^1\text{H}$  NMR (400 MHz,  $\text{CDCl}_3$ ):  $\delta = 8.16\text{--}8.12$  (m, 2H), 7.92–7.89 (m, 2H), 7.66–7.55 (m, 5H), 7.30 (brs, 1H), 3.19–3.16 (m, 4H), 1.67 (quin,  $J = 5.9$  Hz, 4H), 1.53–1.47 ppm (m, 2H);  $^{13}\text{C}$  NMR (101 MHz,  $\text{CDCl}_3$ ):  $\delta = 156.0, 145.5, 142.5, 136.3, 133.4, 129.4, 127.7, 125.2, 117.8, 46.8, 25.3, 23.7$  ppm; IR (neat):  $\nu = 3314, 2923, 1639, 1545, 1491, 1239, 1107, 931$   $\text{cm}^{-1}$ ; HRMS (ESI-TOF)  $m/z$  [ $M + \text{H}$ ] $^+$  calcd for  $\text{C}_{18}\text{H}_{21}\text{N}_4\text{O}_4\text{S}$ : 389.1278, found: 389.1297.

### 1-(2,5-Dimethoxyphenyl)-3-[oxo(phenyl)(piperidin-1-yl)- $\lambda^6$ -sulfanylidene]urea (**2gd**)

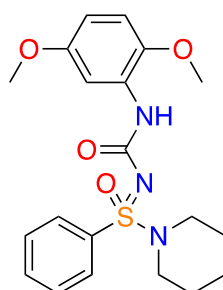

Prepared according to general procedure **E**, from 2,5-dimethoxyphenyl isocyanate; after workup, the  $^1\text{H}$  NMR spectrum indicated clean formation of **2gd** as a white solid (133 mg, 75%): m.p. 128–130  $^\circ\text{C}$ ;  $^1\text{H}$  NMR (400 MHz,  $\text{CDCl}_3$ ):  $\delta = 8.00$  (brs, 1H), 7.93–7.90 (m, 2H), 7.62–7.52 (m, 4H), 6.74 (d,  $J = 8.9$  Hz, 1H), 6.46 (dd,  $J = 8.8, 3.1$  Hz, 1H), 3.82 (s, 3H), 3.73 (s, 3H), 3.20–3.10 (m, 4H), 1.68–1.64 (m,  $J = 5.7$  Hz, 4H), 1.50–1.44 ppm (m, 2H);  $^{13}\text{C}$  NMR (101 MHz,  $\text{CDCl}_3$ ):  $\delta = 156.0, 154.1, 141.7, 136.6, 132.8, 129.8, 129.1, 127.7, 110.8, 107.3, 104.6, 56.3, 55.8, 46.7, 25.3, 23.6$  ppm; IR (neat):  $\nu = 3396, 2982, 2836, 1651, 1527, 1241, 1212, 1041, 934$   $\text{cm}^{-1}$ ; HRMS (ESI-TOF)  $m/z$  [ $M + \text{H}$ ] $^+$  calcd for  $\text{C}_{20}\text{H}_{26}\text{N}_3\text{O}_4\text{S}$ : 404.1639, found: 404.1656.

### 1-(4-Methoxyphenyl)-3-[oxo(phenyl)(piperidin-1-yl)- $\lambda^6$ -sulfanylidene]urea (2ge)

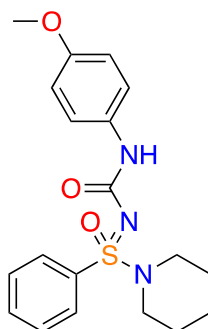

Prepared according to general procedure **E**, from 4-methoxyphenyl isocyanate; after workup, the  $^1\text{H}$  NMR spectrum indicated clean formation of **2ge** as a white solid (134 mg, 82%): m.p. 205–207 °C;  $^1\text{H}$  NMR (400 MHz,  $\text{CDCl}_3$ ):  $\delta$  = 7.91 (d,  $J$  = 7.6 Hz, 2H), 7.62–7.58 (m, 1H), 7.55–7.51 (m, 2H), 7.35 (d,  $J$  = 8.6 Hz, 2H), 6.87 (brs, 1H), 6.83–6.79 (m, 2H), 3.76 (s, 3H), 3.21–3.11 (m, 4H), 1.65 (quin,  $J$  = 5.6 Hz, 4H), 1.50–1.45 ppm (m, 2H);  $^{13}\text{C}$  NMR (101 MHz,  $\text{CDCl}_3$ ):  $\delta$  = 137.0, 132.9, 129.2, 127.8, 120.6, 114.2, 55.7, 46.8, 25.4, 23.7 ppm; IR (neat):  $\nu$  = 3310, 2942, 1629, 1507, 1185, 939  $\text{cm}^{-1}$ ; HRMS (ESI-TOF)  $m/z$  [ $M + \text{H}$ ] $^+$  calcd for  $\text{C}_{19}\text{H}_{24}\text{N}_3\text{O}_3\text{S}$ : 374.1533, found: 374.1539.

### 4-Methyl-*N*-{[oxo(phenyl)(piperidin-1-yl)- $\lambda^6$ -sulfanylidene]carbamoyl}benzenesulfonamide (2gf)

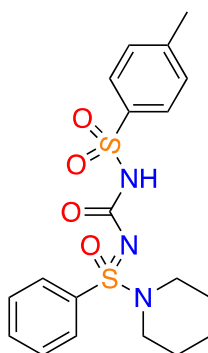

Prepared according to general procedure **E**, from 4-methylbenzenesulfonyl isocyanate; crude purified by flash column chromatography (KP-Sil, 0–100% EtOAc in PE) to give **2gf** as a colorless oil (92 mg, 49%):  $^1\text{H}$  NMR (400 MHz,  $\text{CDCl}_3$ ):  $\delta$  = 7.87 (d,  $J$  = 8.1 Hz, 2H), 7.81–7.79 (m, 2H), 7.62–7.58 (m, 1H), 7.51 (t,  $J$  = 5.9 Hz, 2H), 7.24 (d,  $J$  = 8.1 Hz, 2H), 3.10–2.96 (m, 4H), 2.39 (s, 3H), 1.58–1.56 (m, 4H), 1.44–1.42 ppm (m, 2H);  $^{13}\text{C}$  NMR (101 MHz,  $\text{CDCl}_3$ ):  $\delta$  = 153.4, 144.3, 136.7, 135.6, 133.5, 129.5, 129.4, 128.2, 127.8, 46.6, 25.2, 23.6, 21.7 ppm; IR (neat):  $\nu$  = 3244, 2940, 2854, 1674, 1329, 1253, 1153, 926  $\text{cm}^{-1}$ ; HRMS (ESI-TOF)  $m/z$  [ $M + \text{H}$ ] $^+$  calcd for  $\text{C}_{19}\text{H}_{24}\text{N}_3\text{O}_4\text{S}_2$ : 422.1203, found: 422.1209.

# <sup>1</sup>H and <sup>13</sup>C NMR spectra of N-functionalized sulfonimidamides

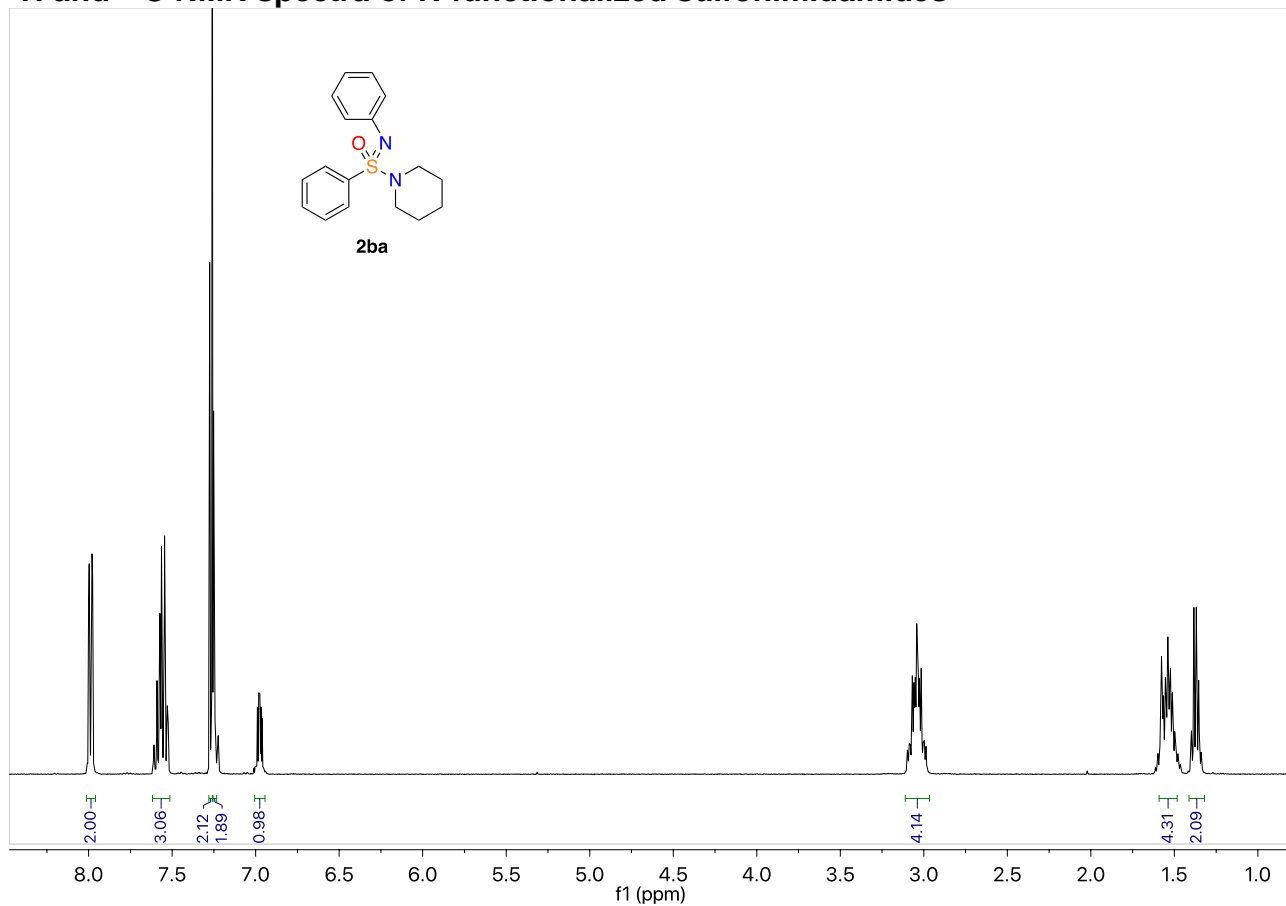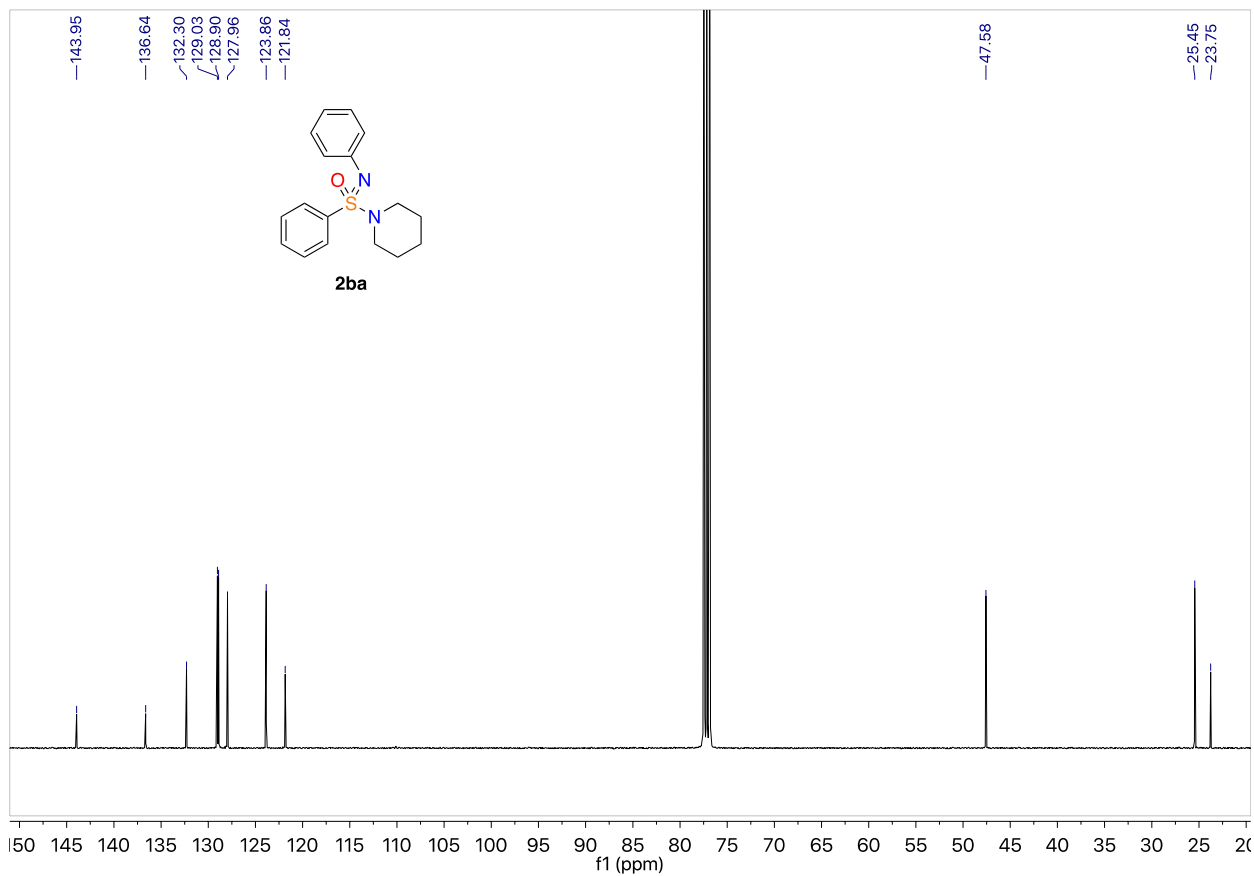

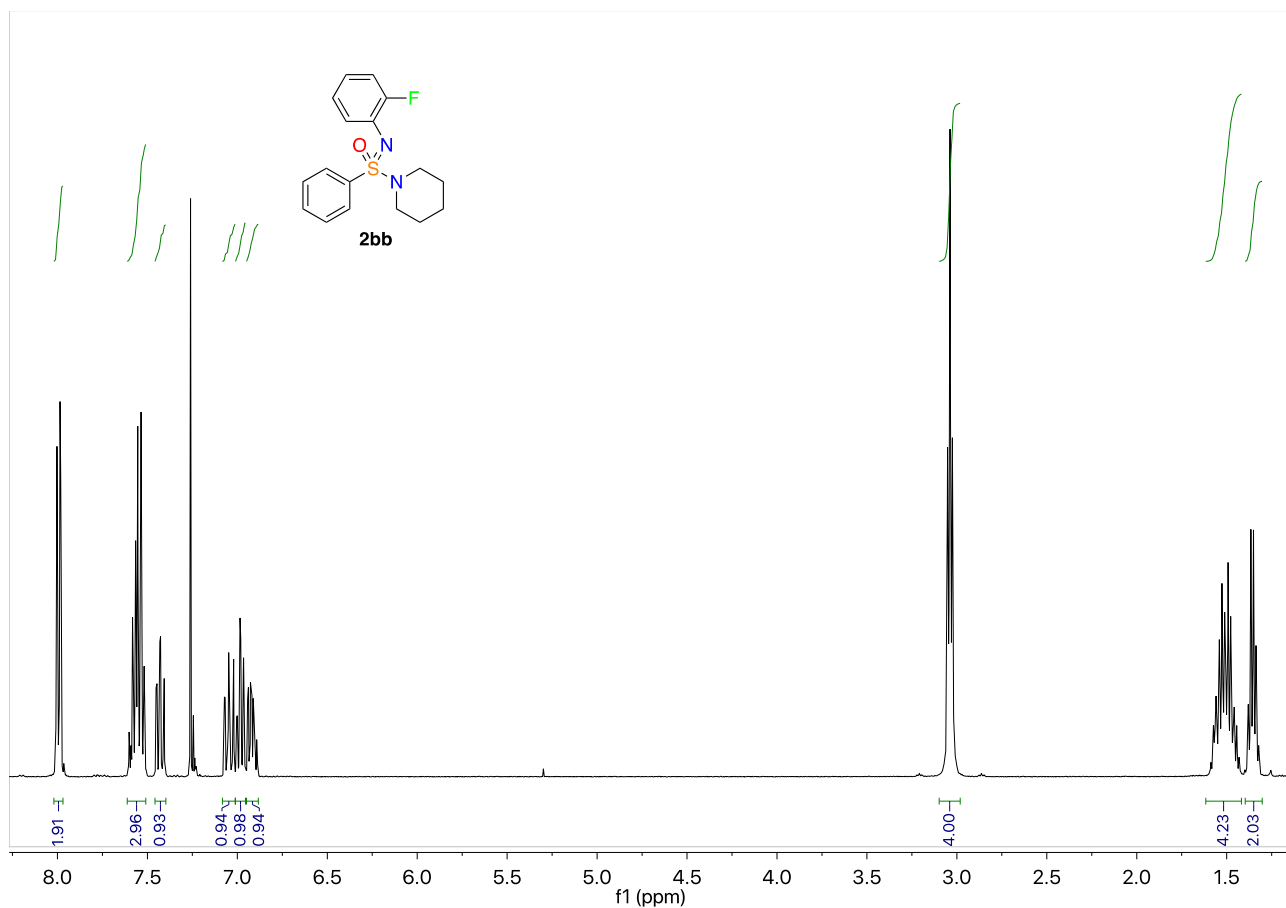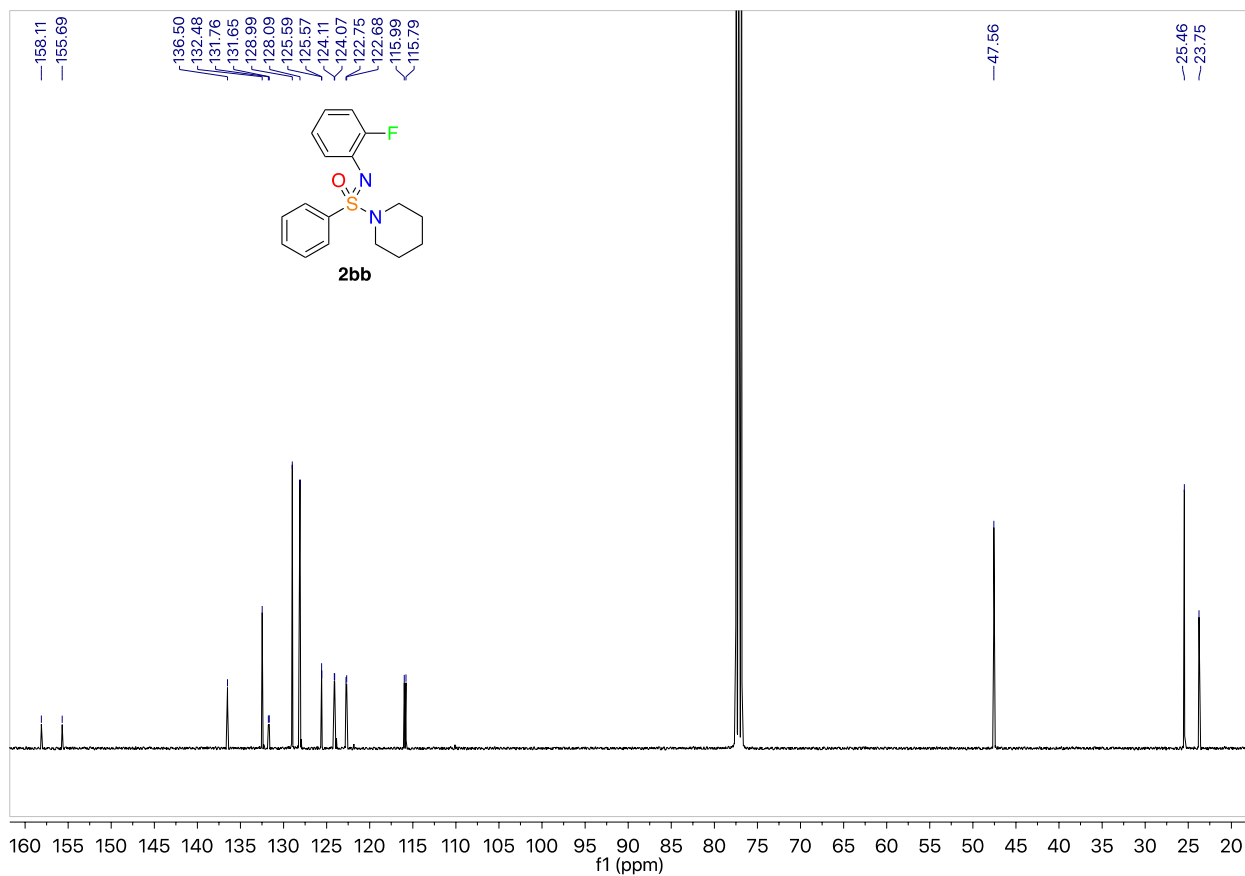

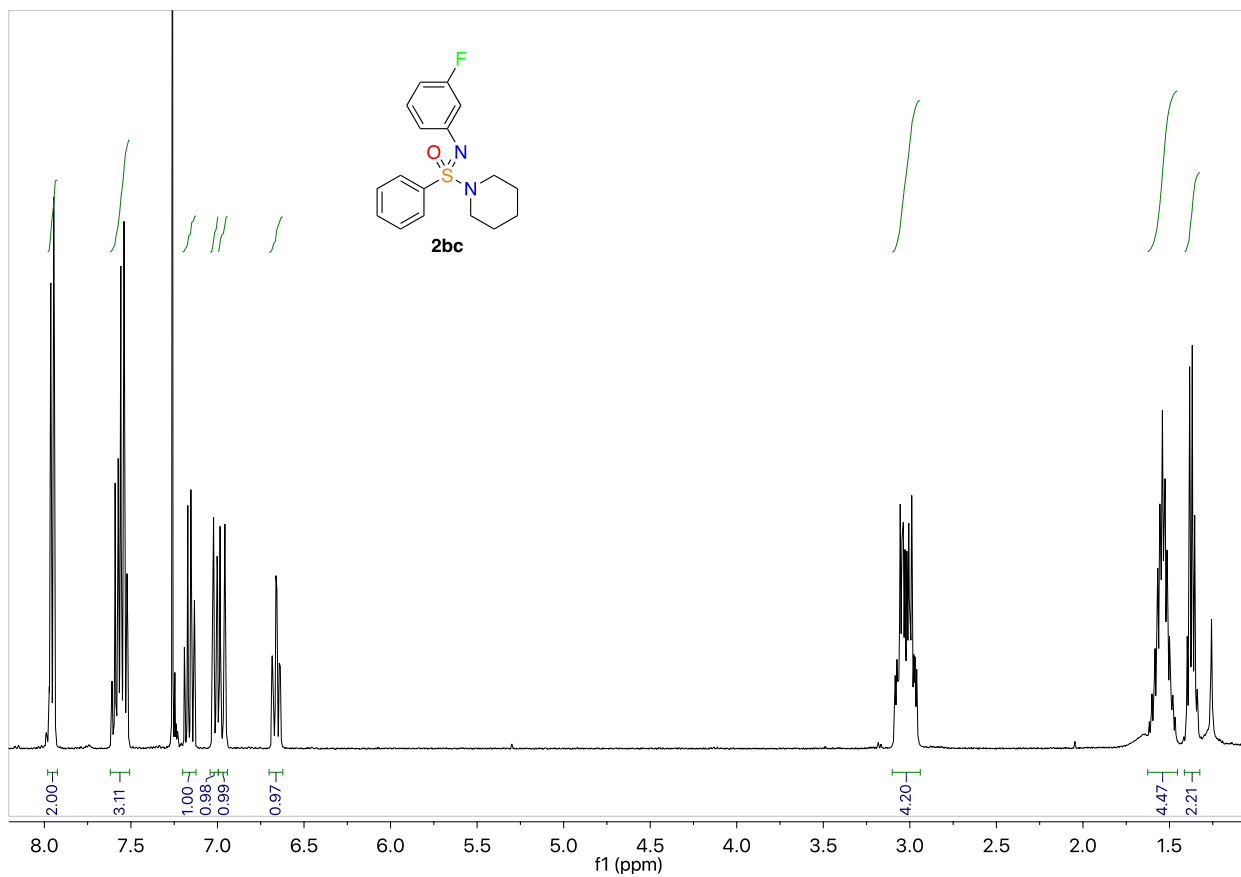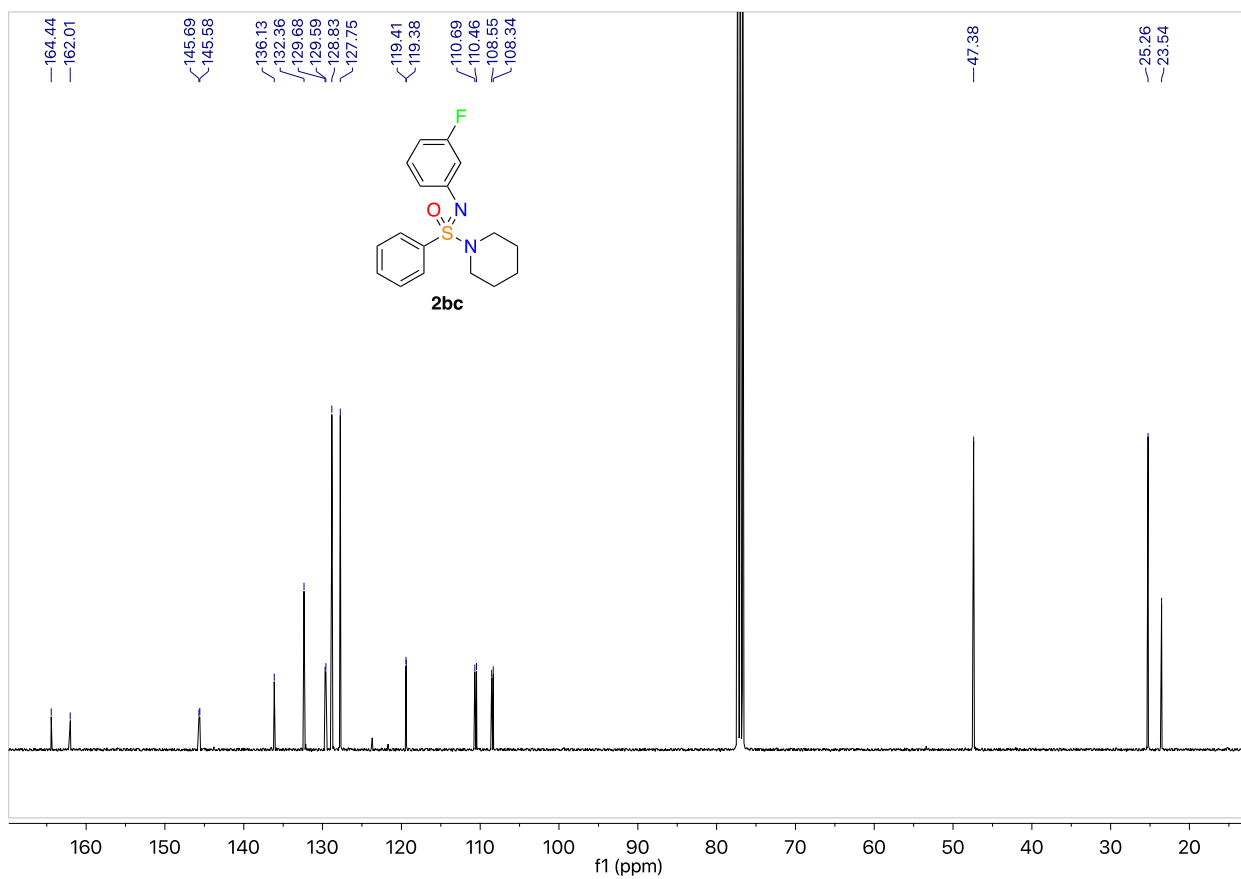

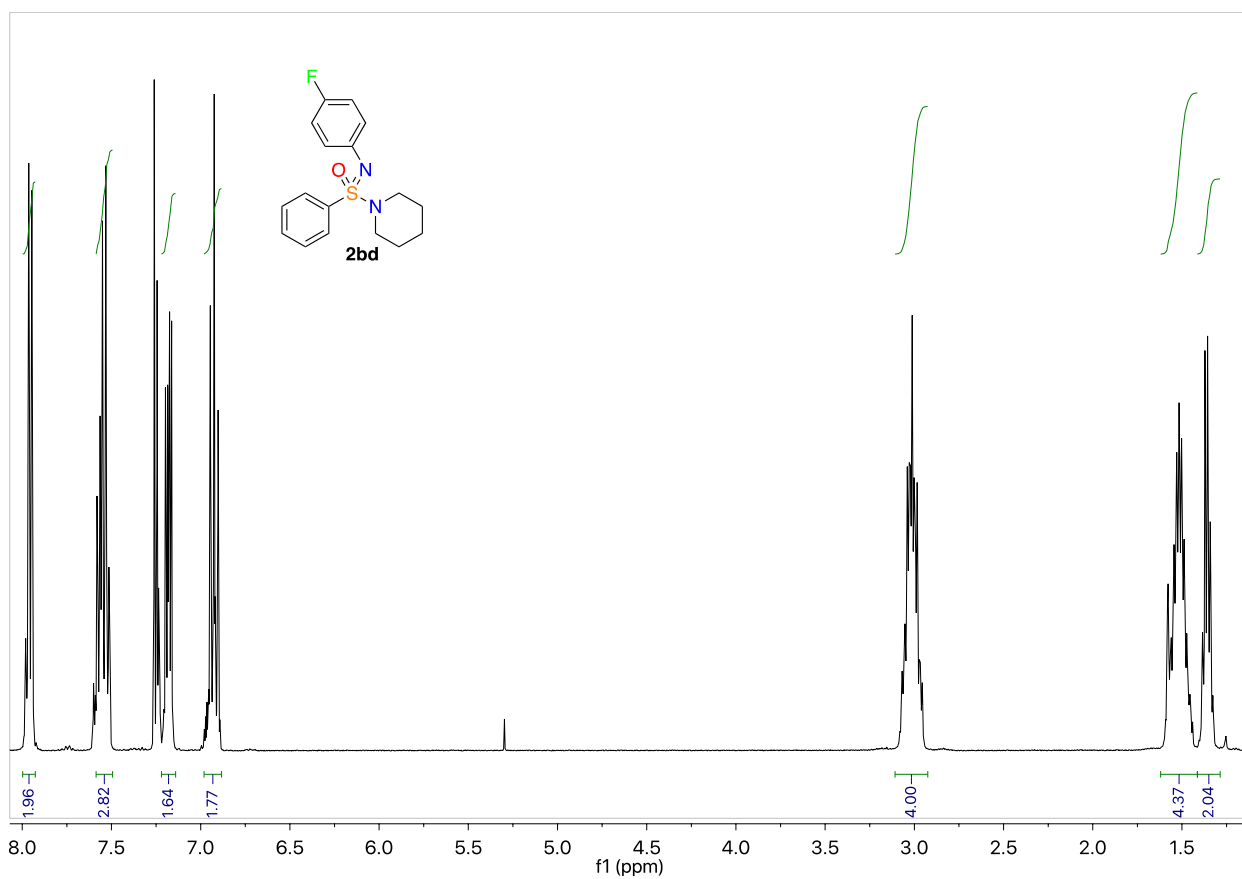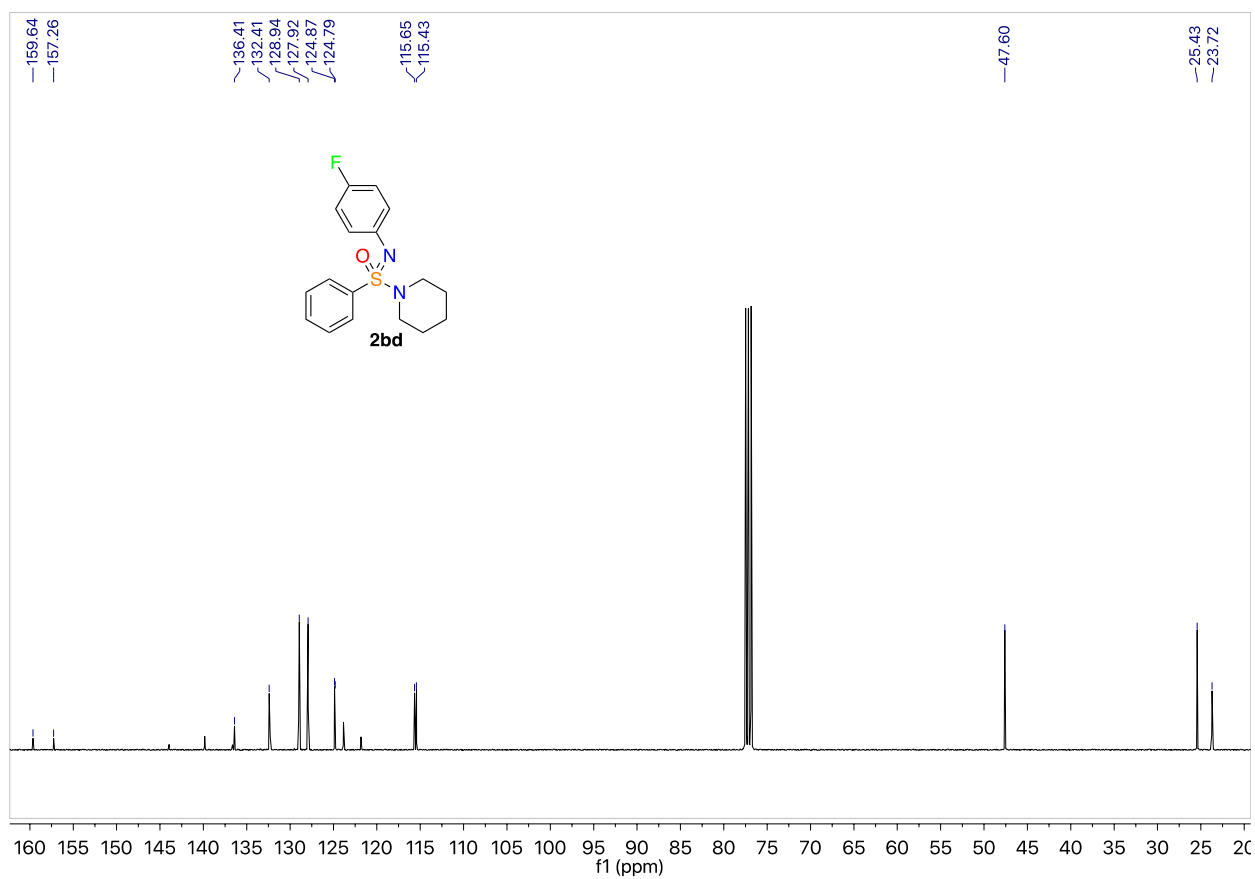

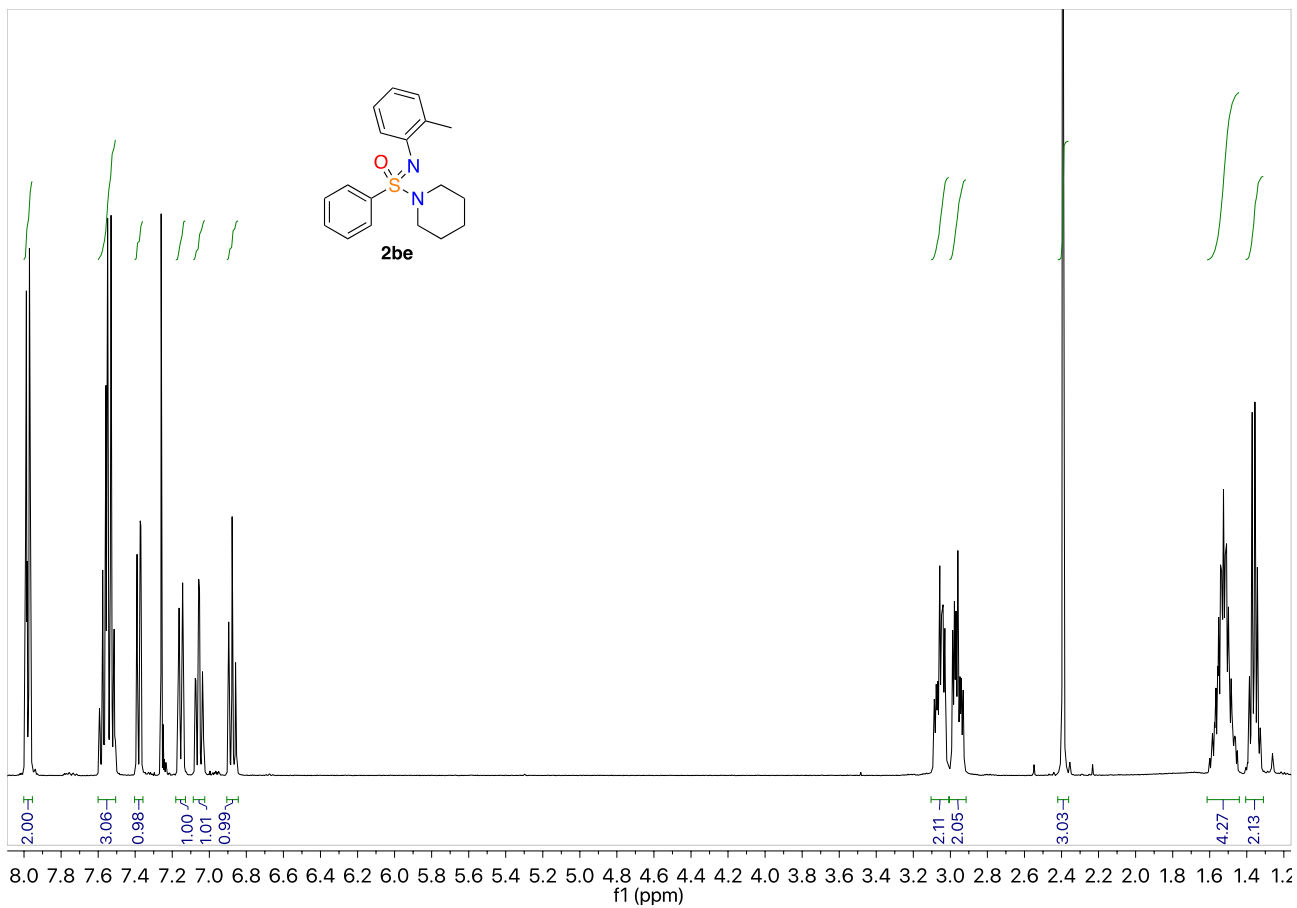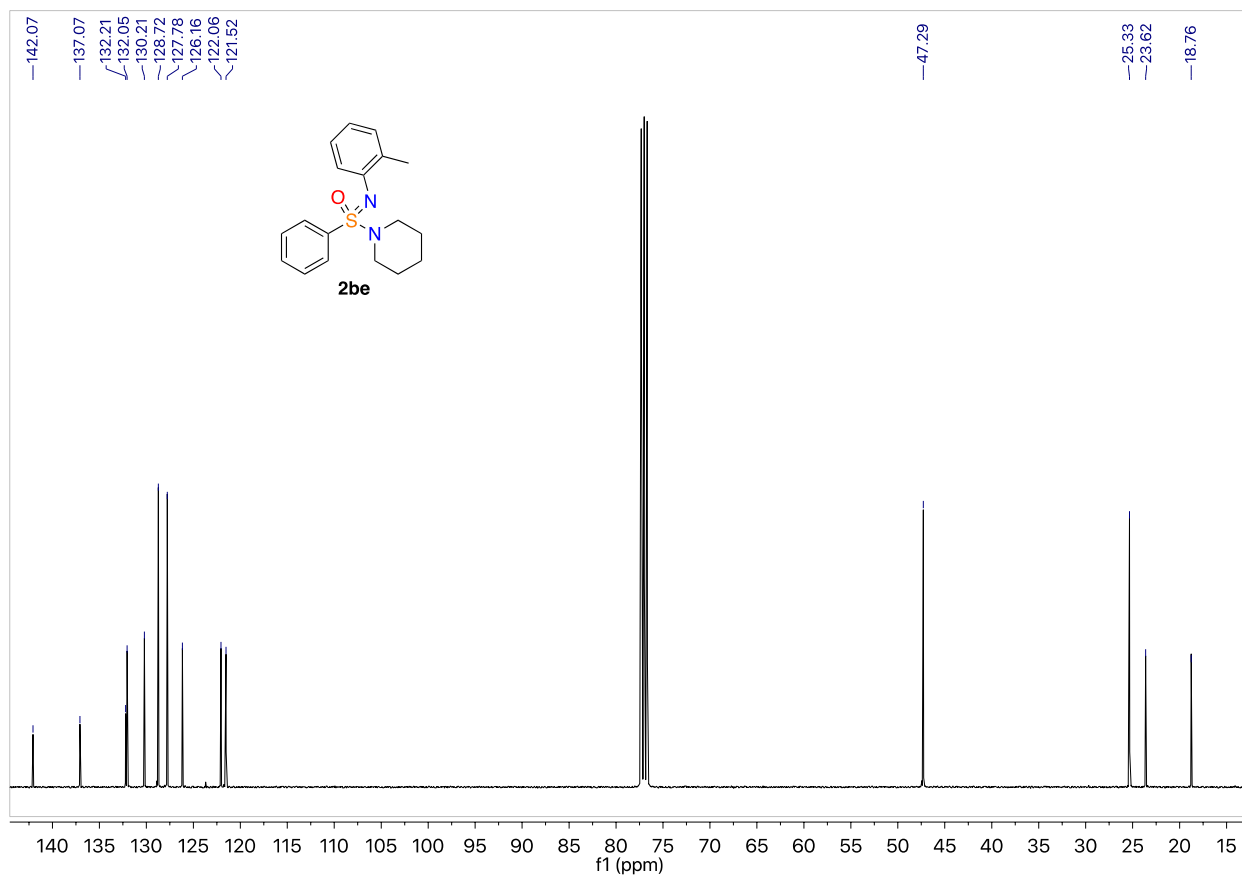

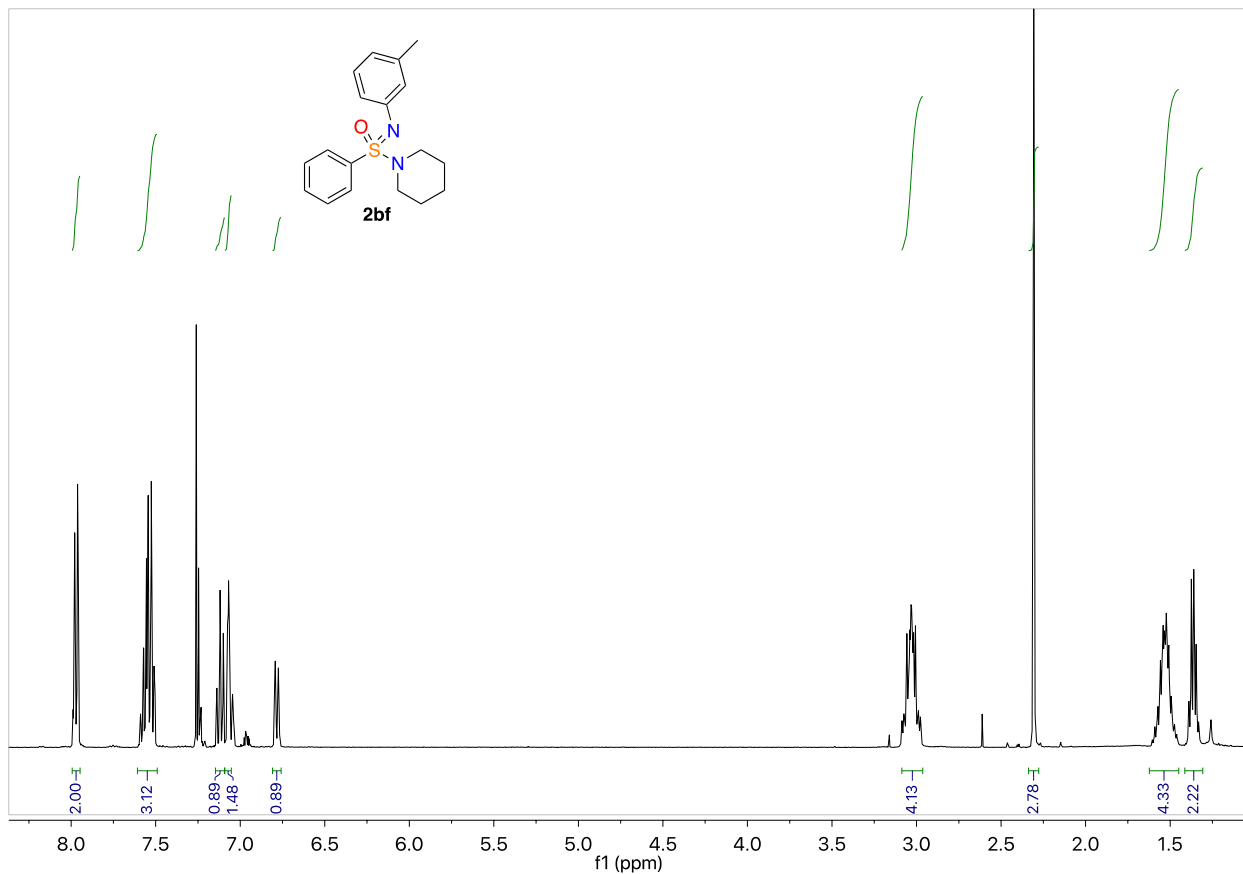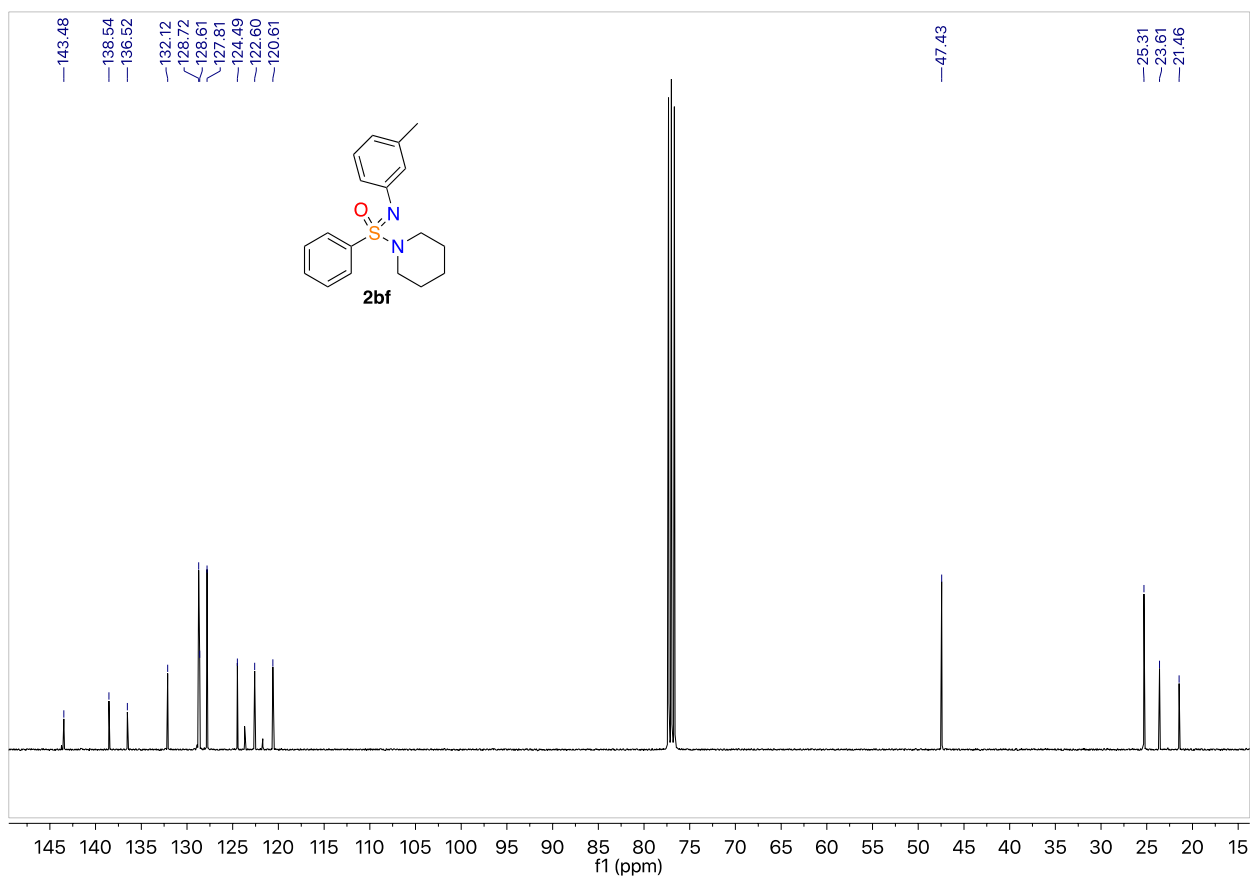



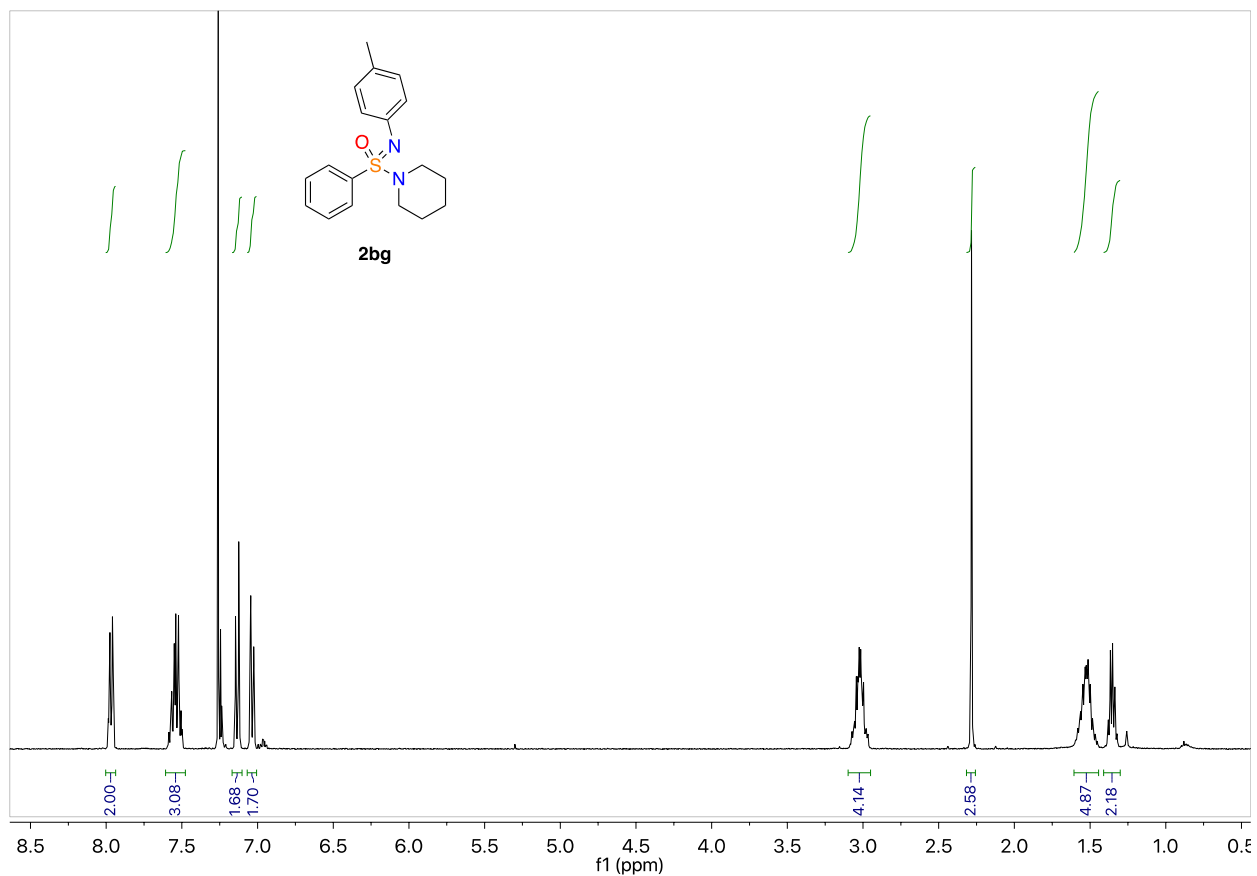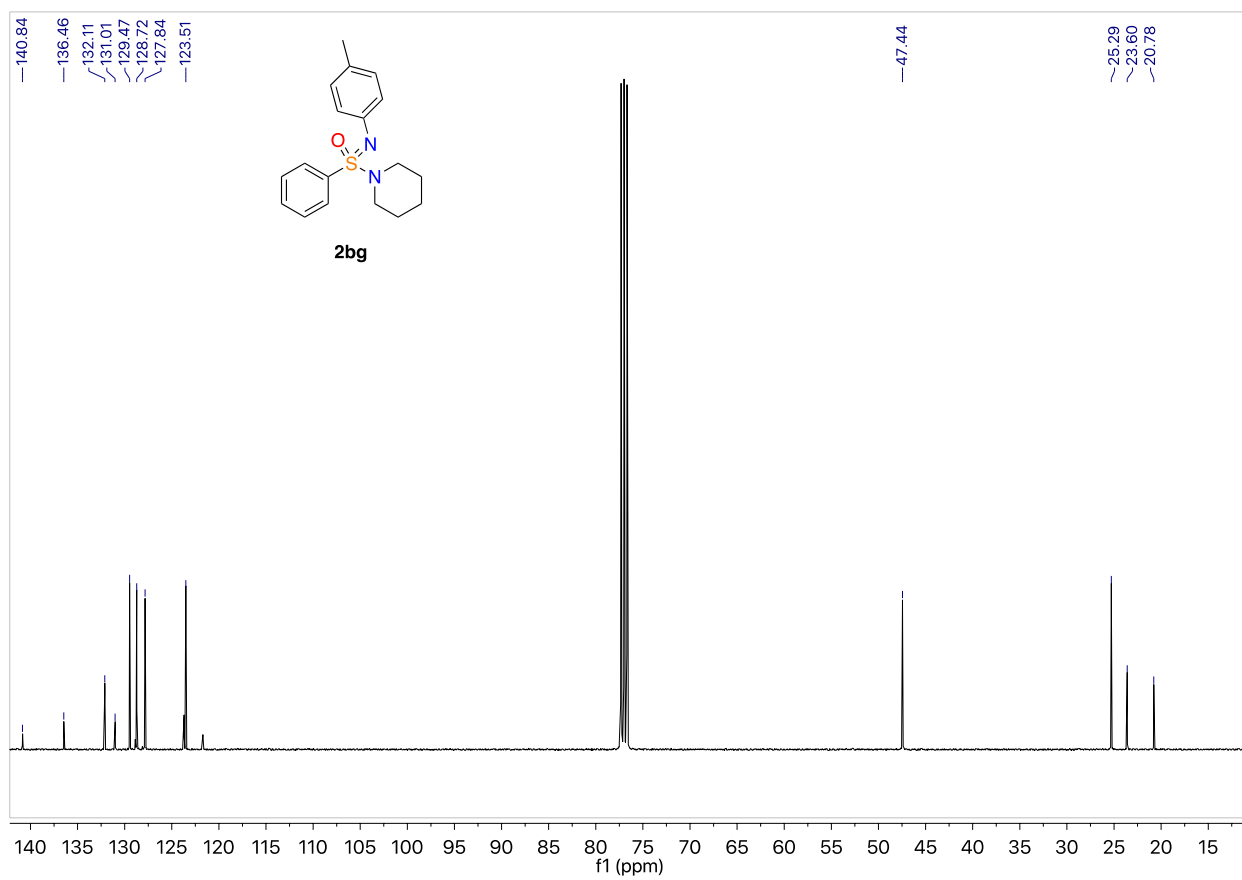

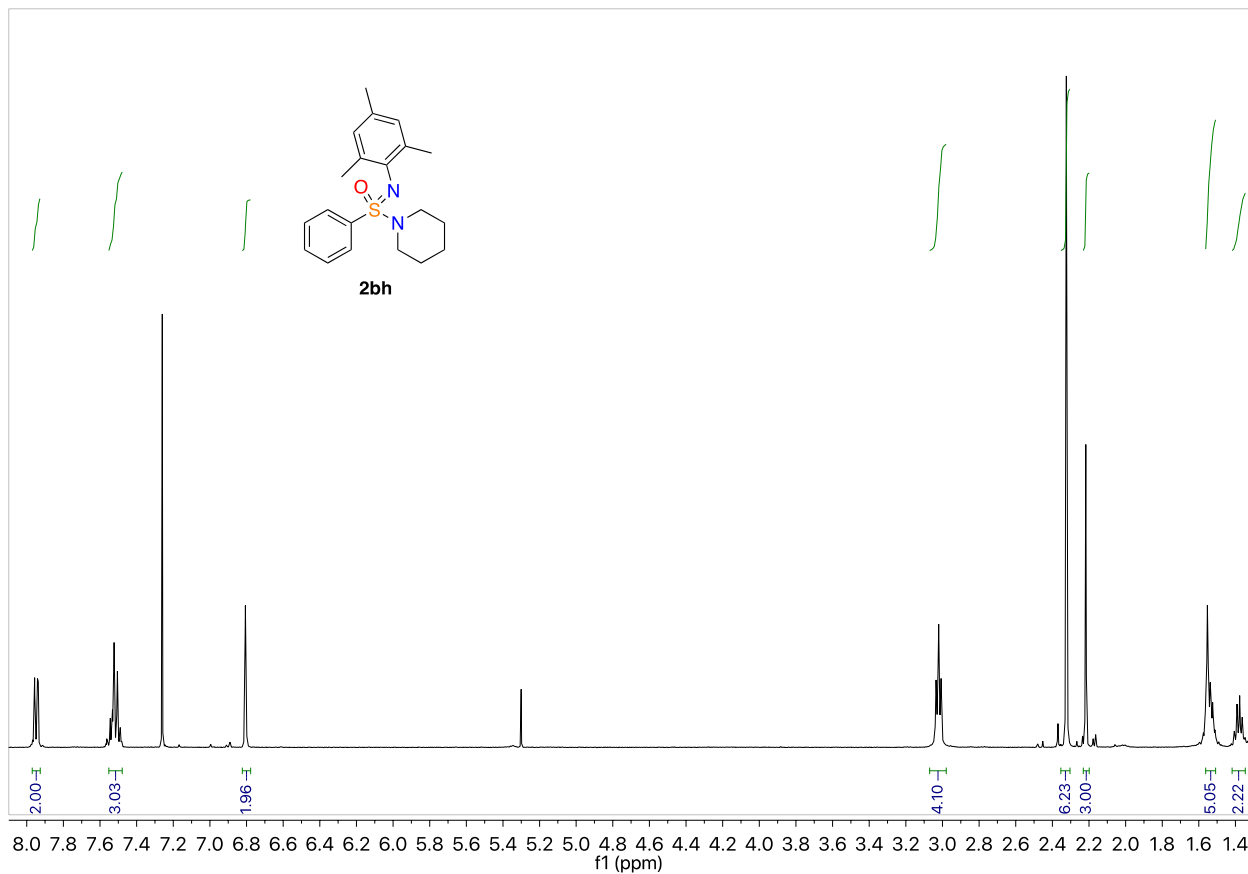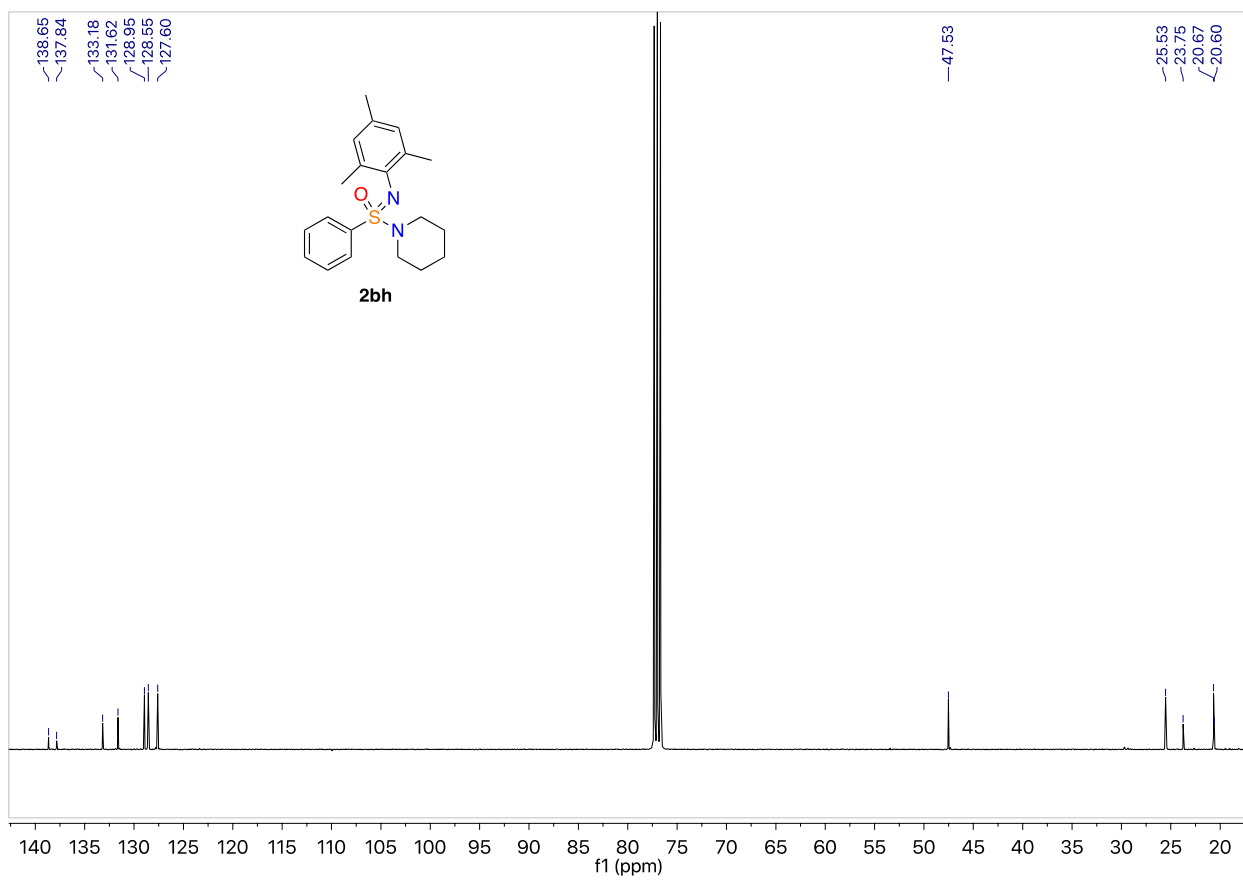

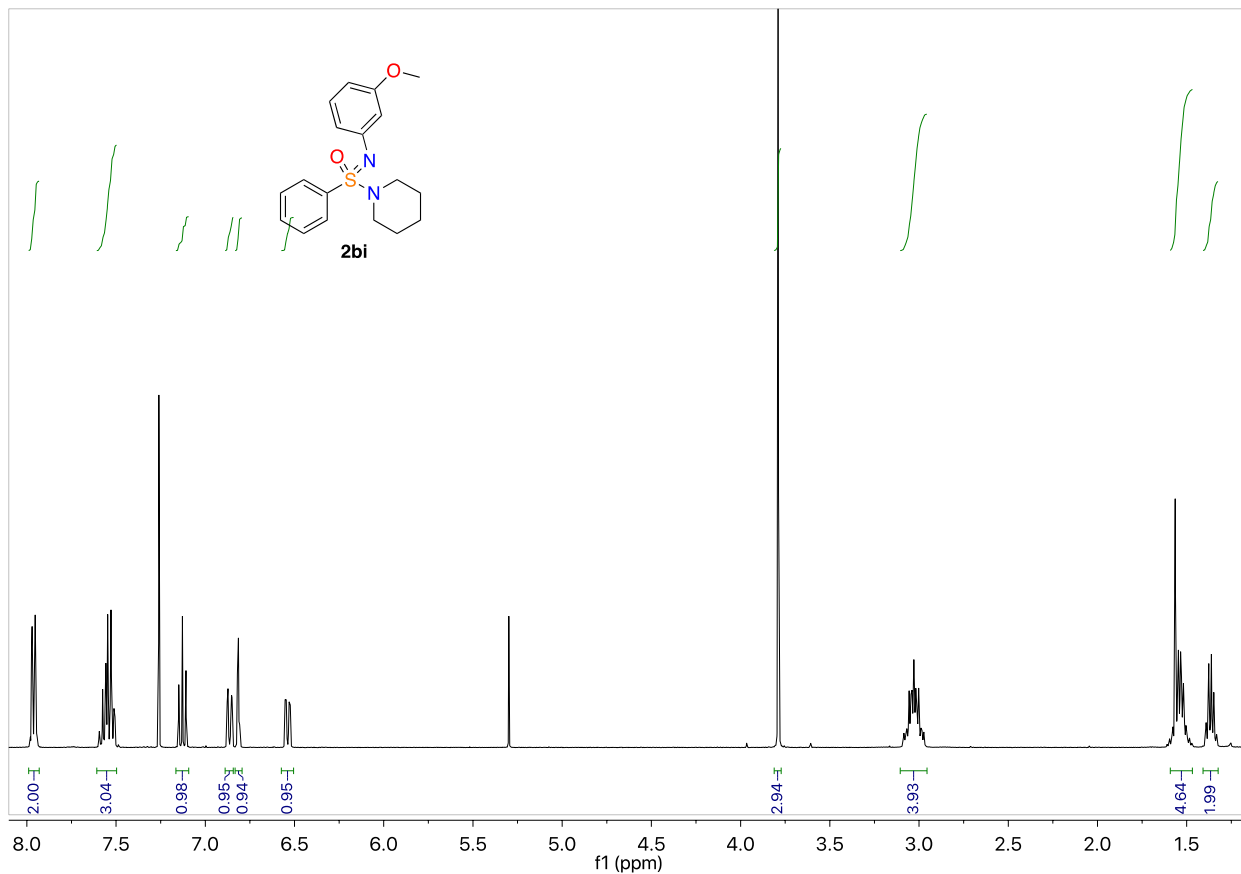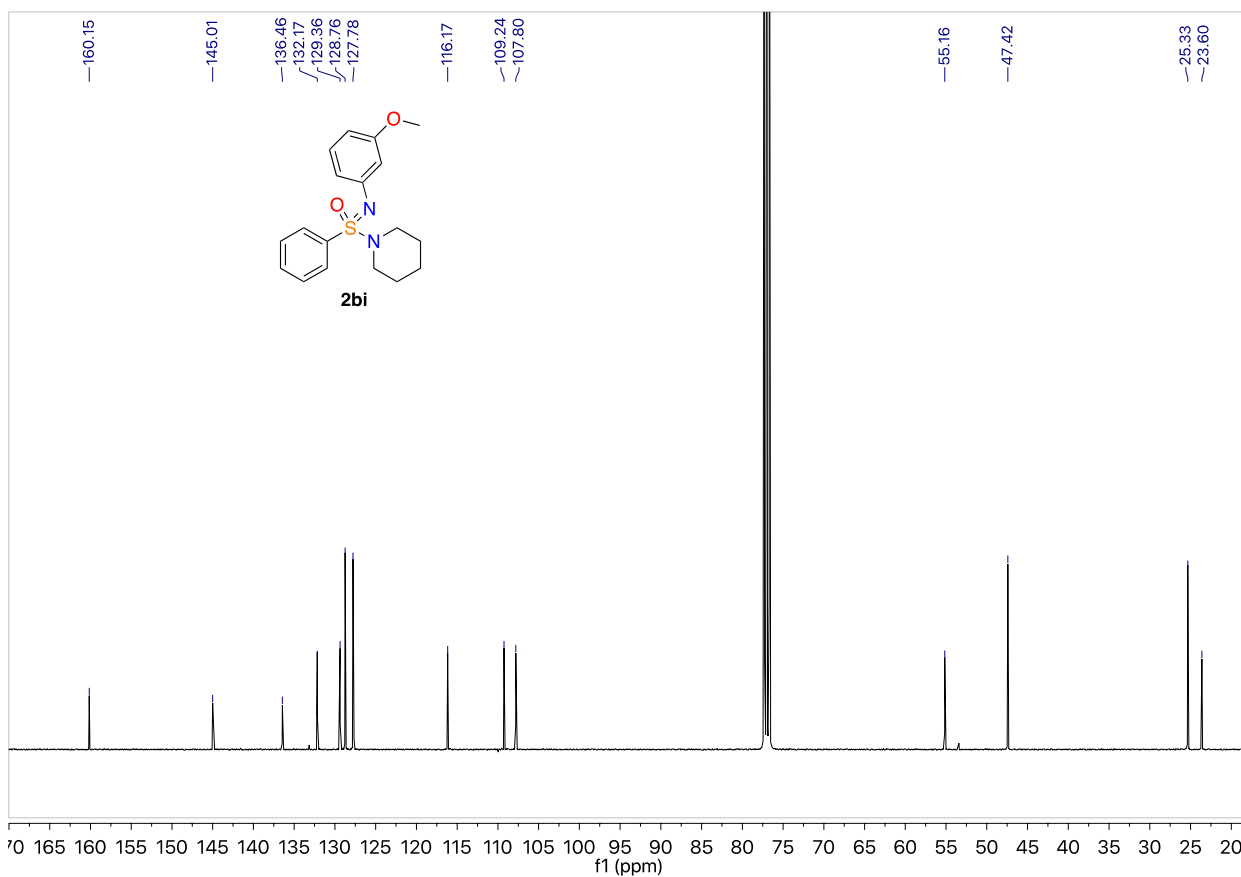

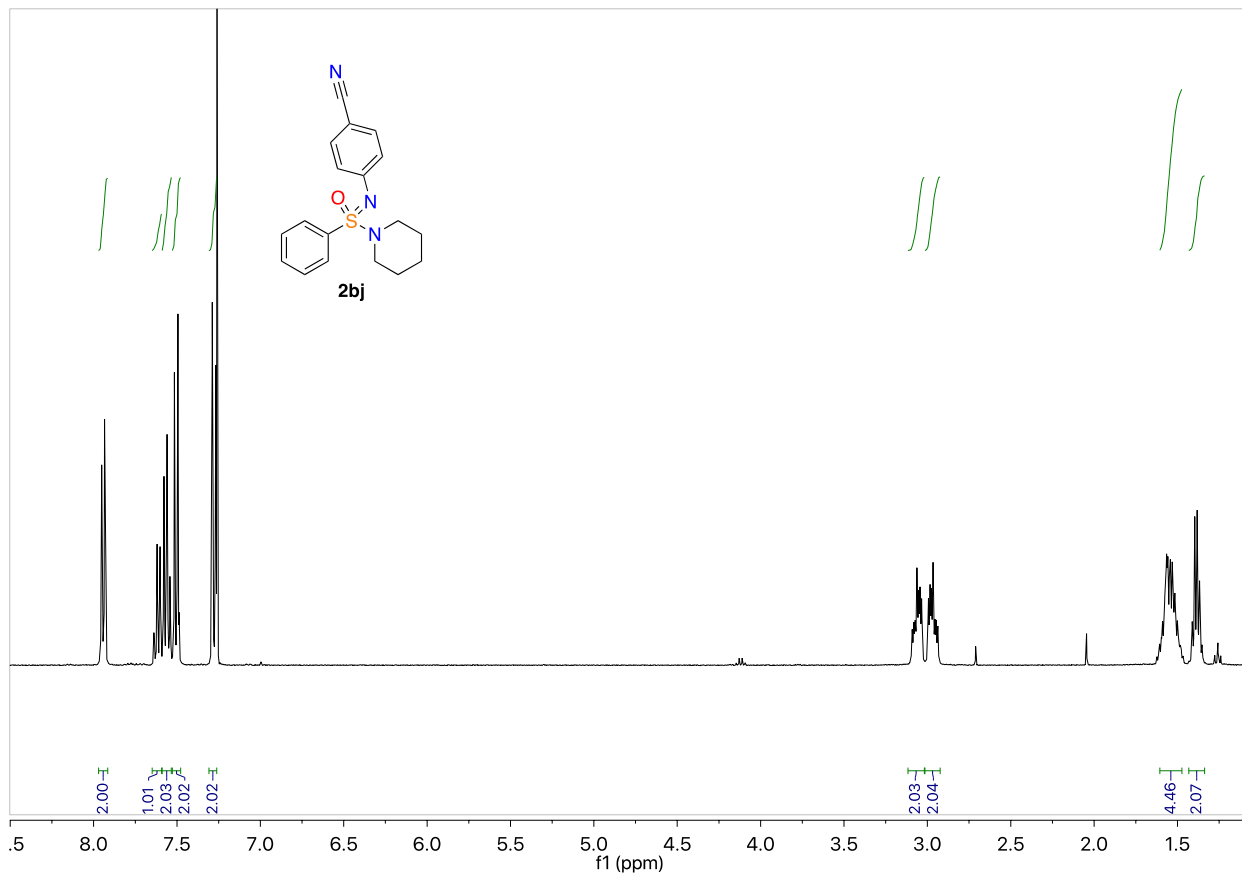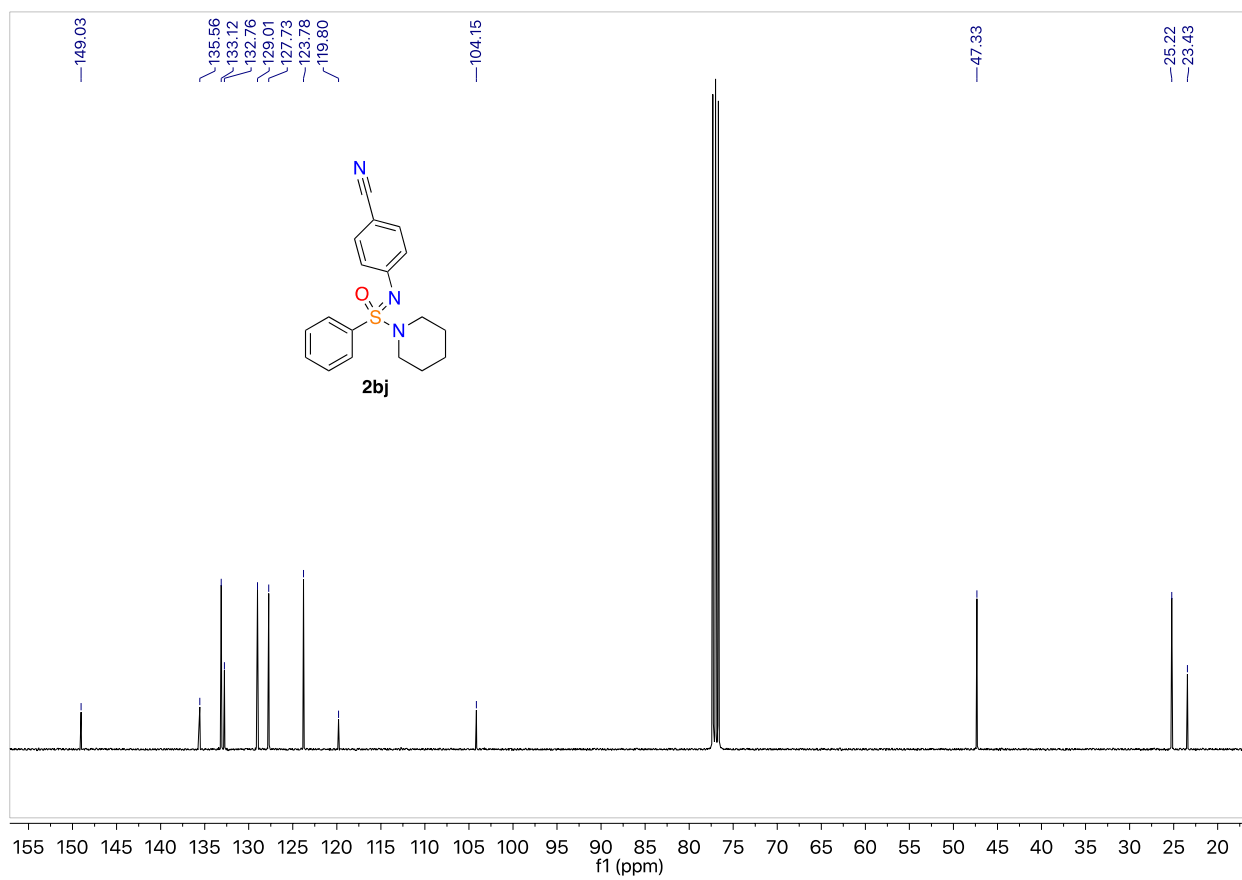

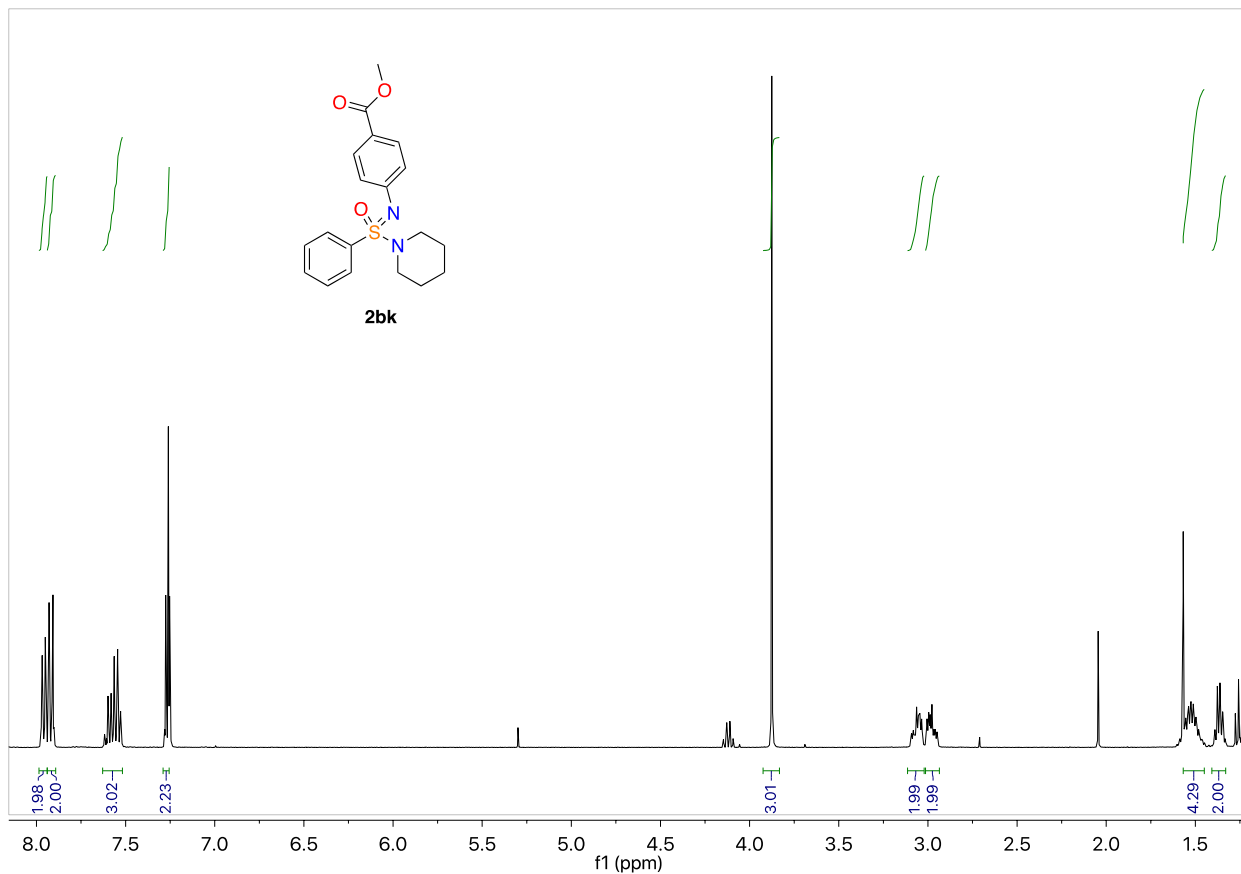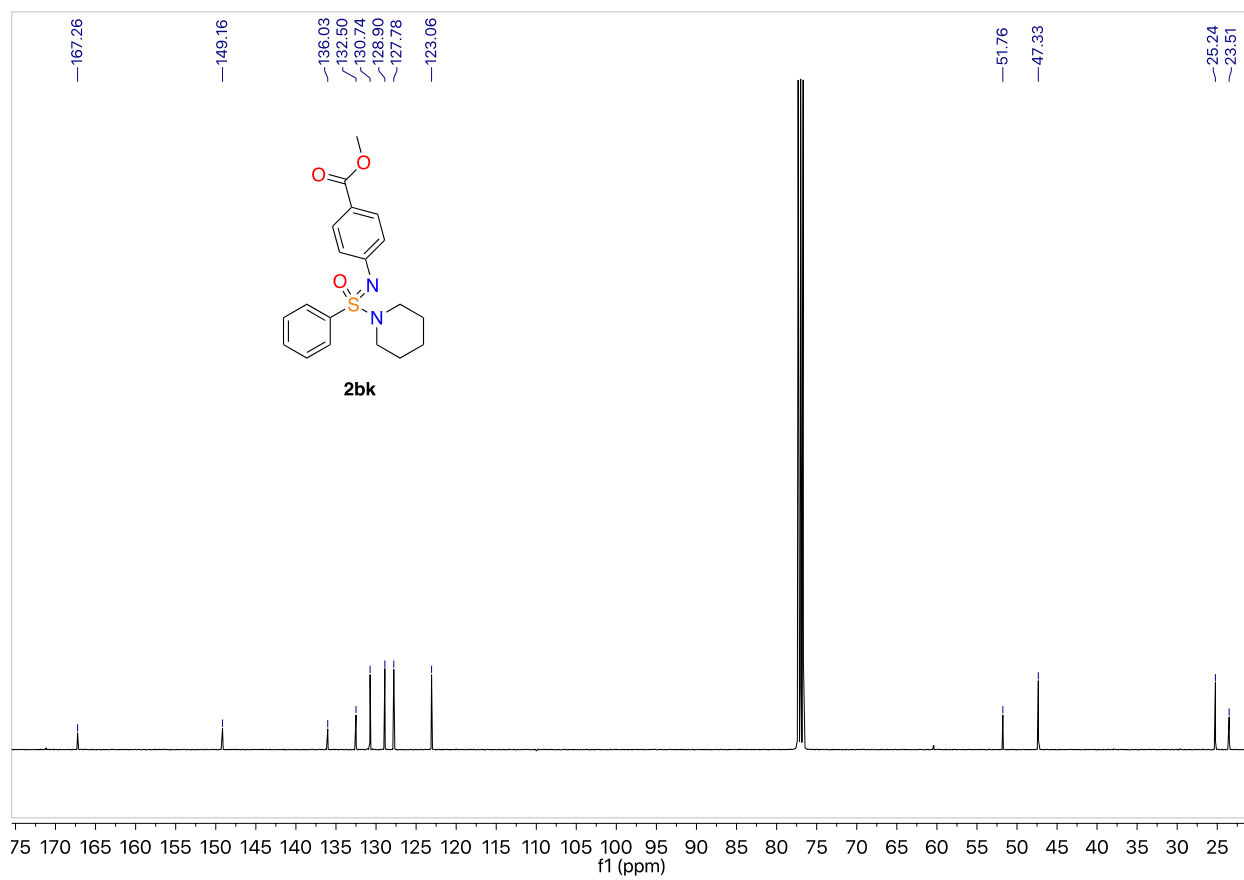

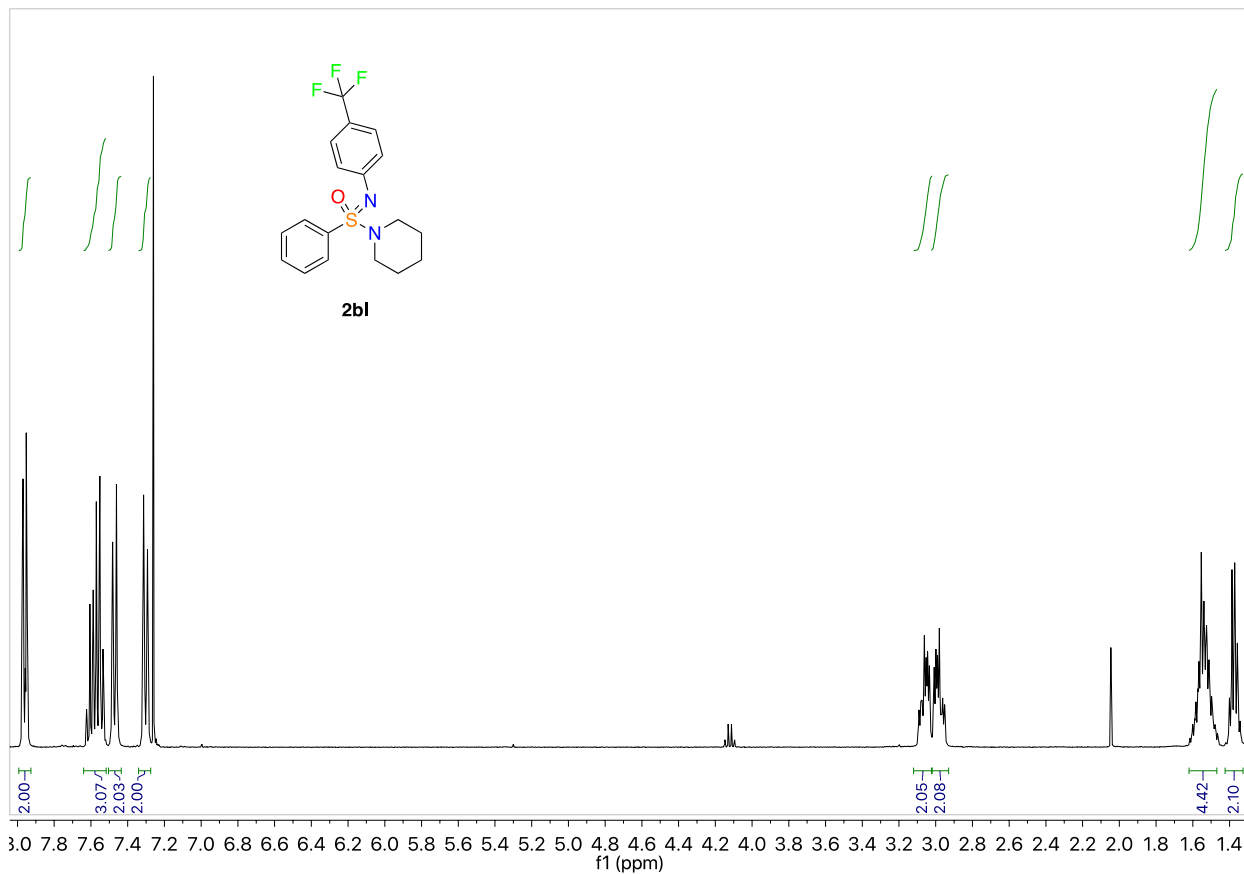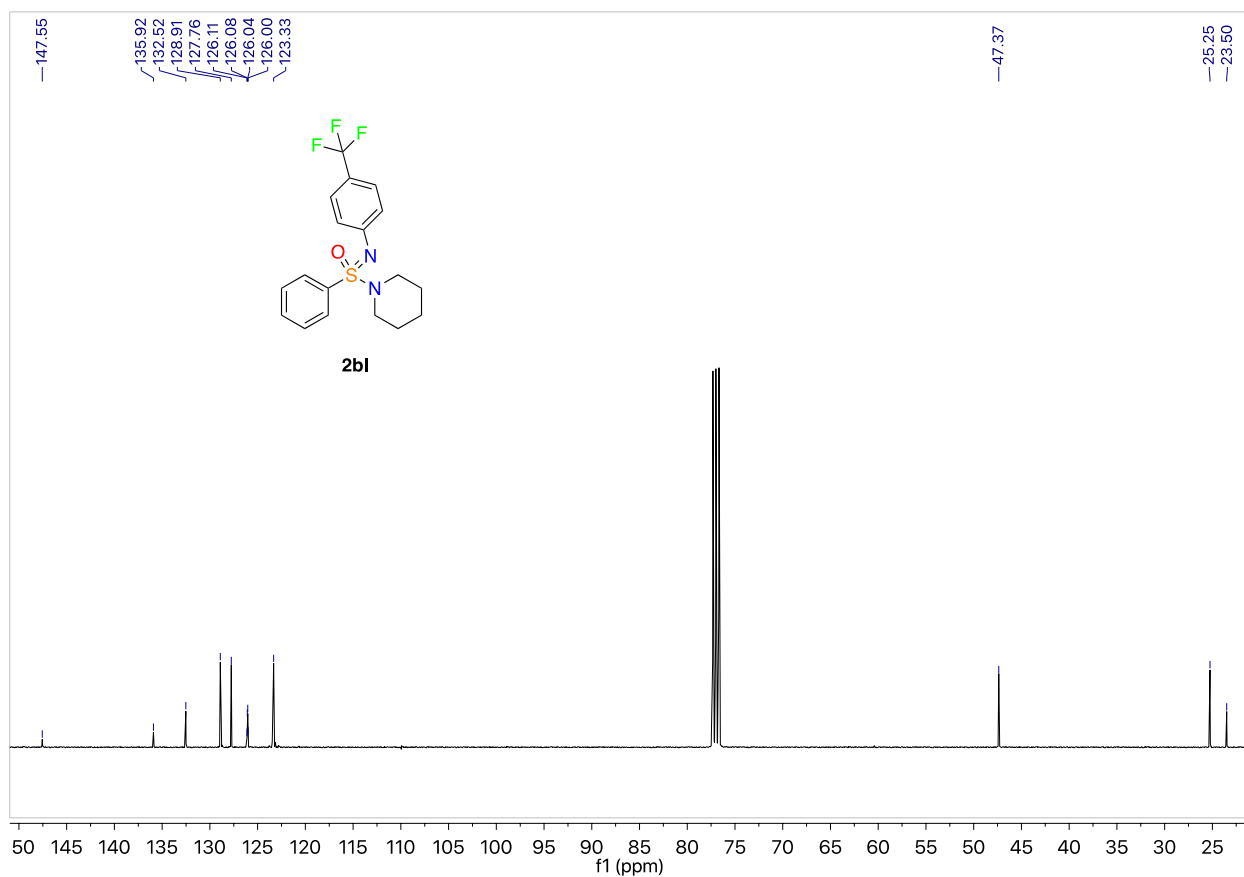

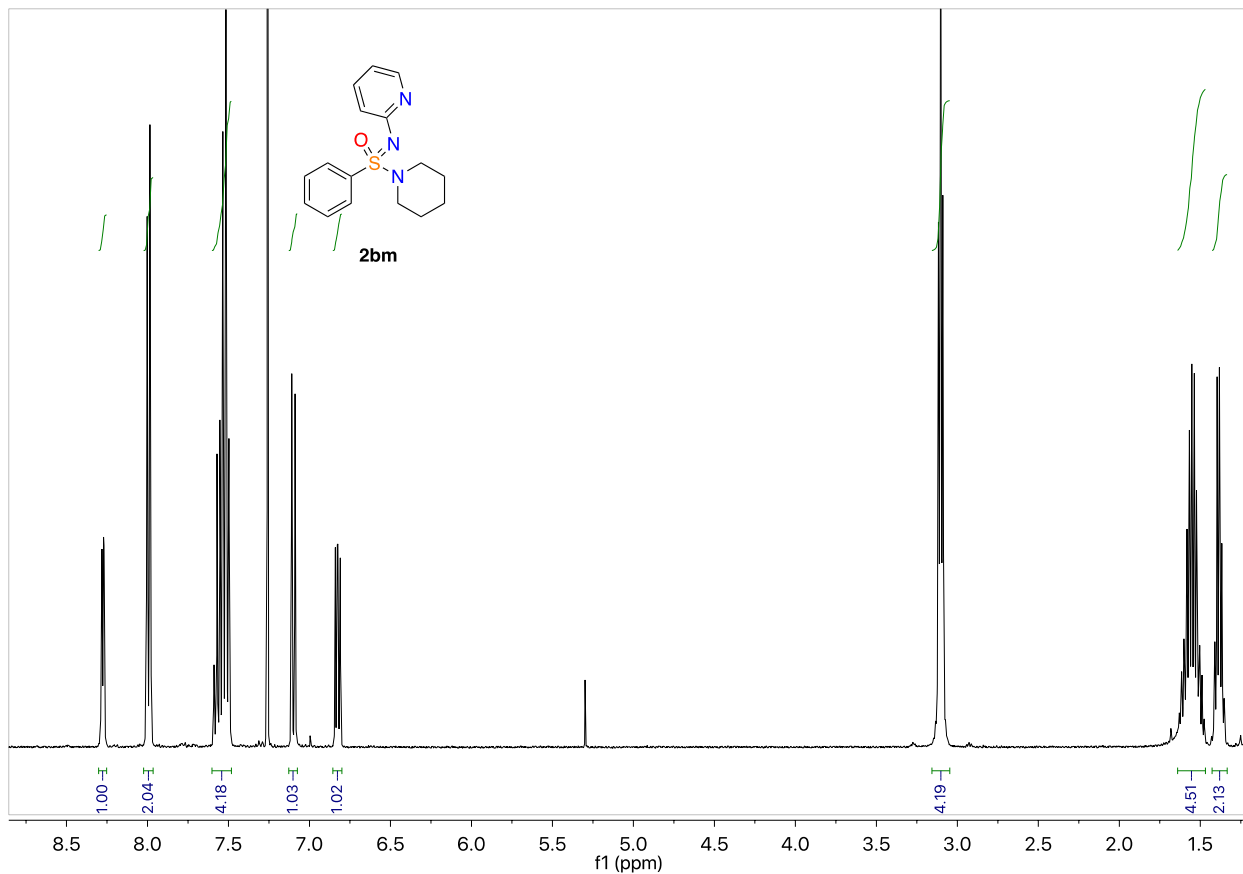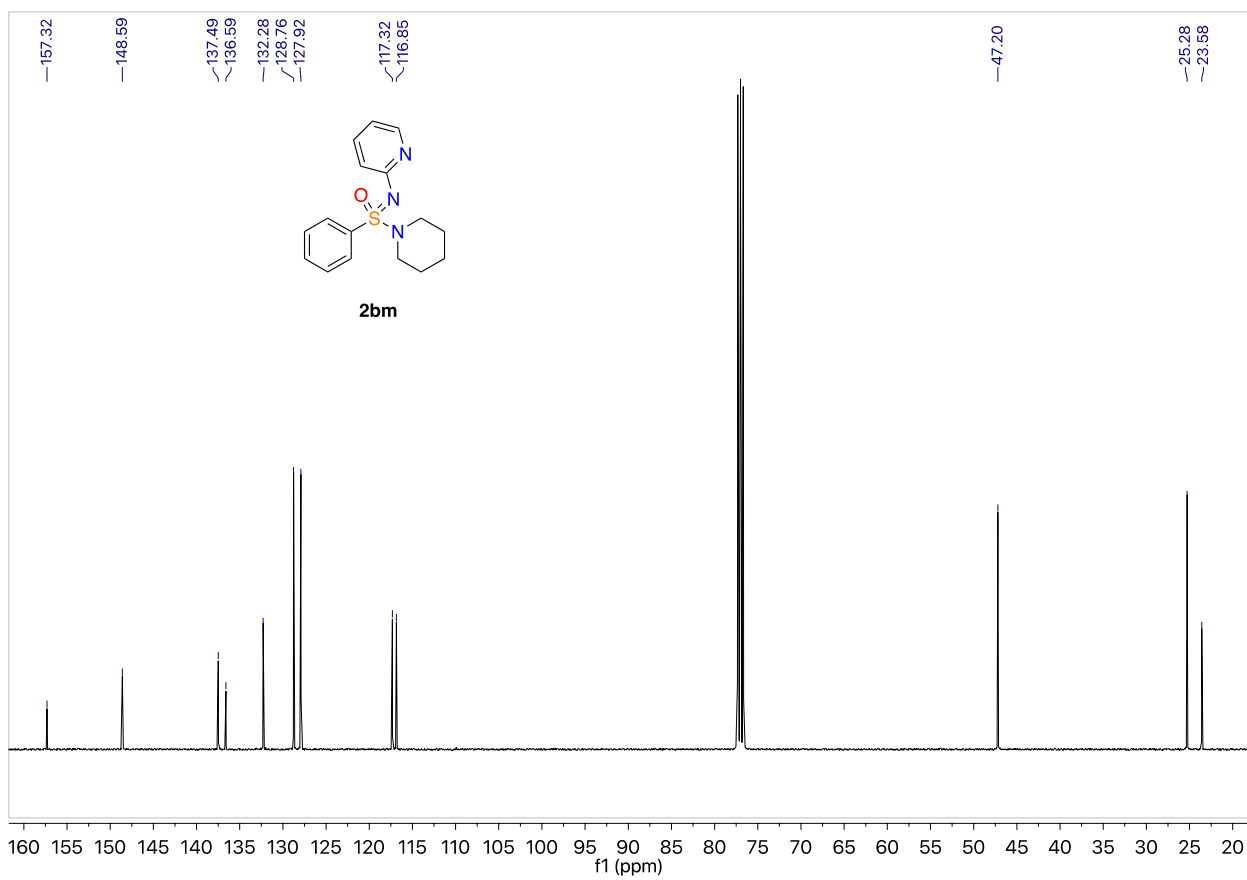

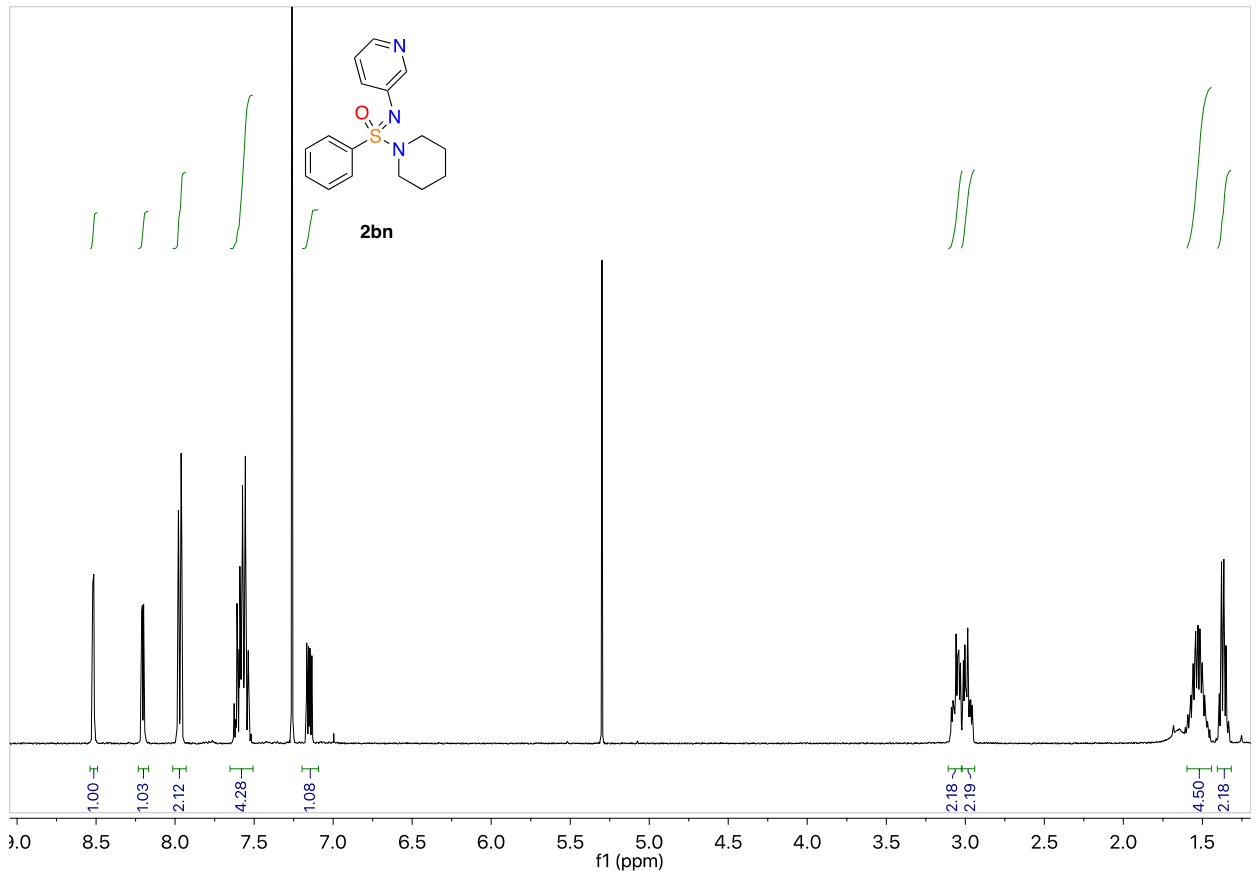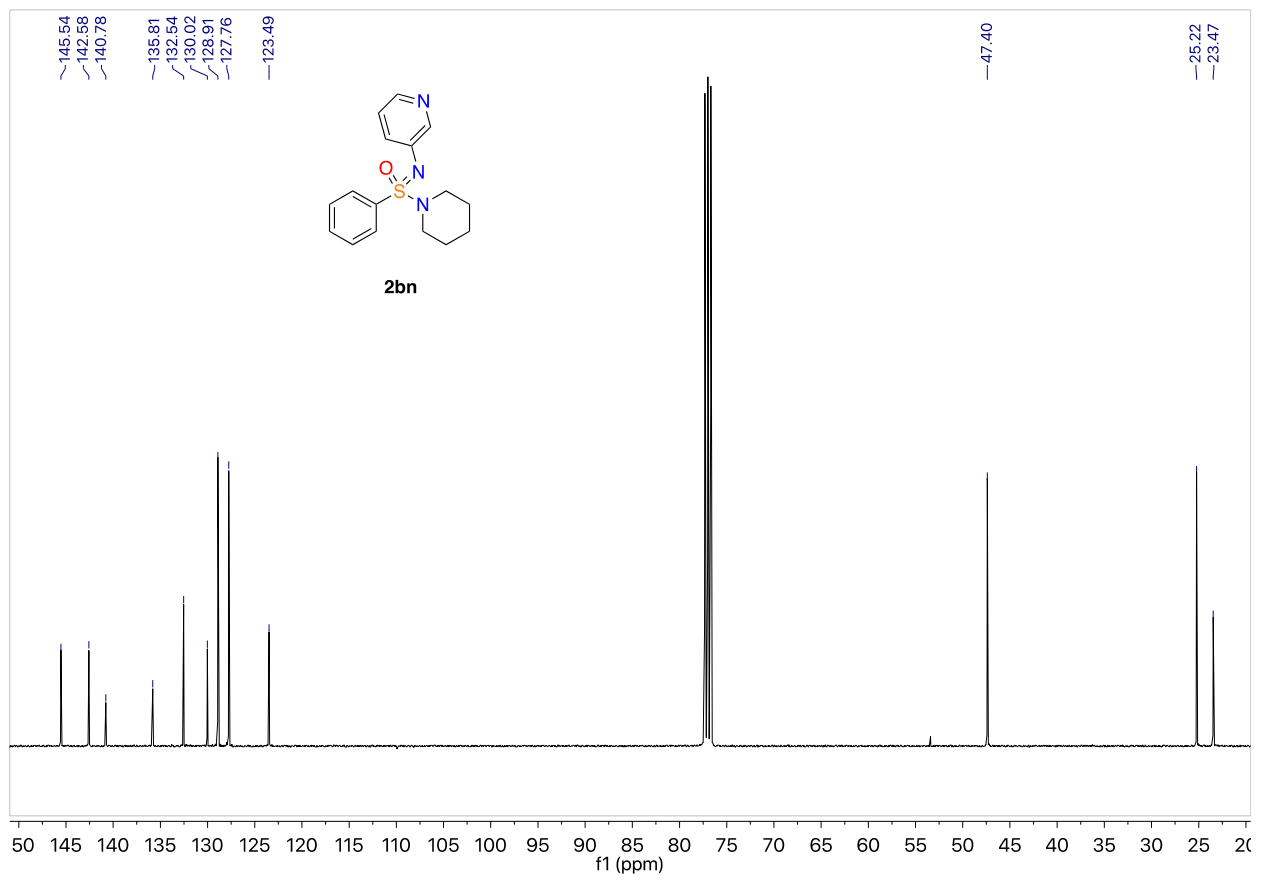



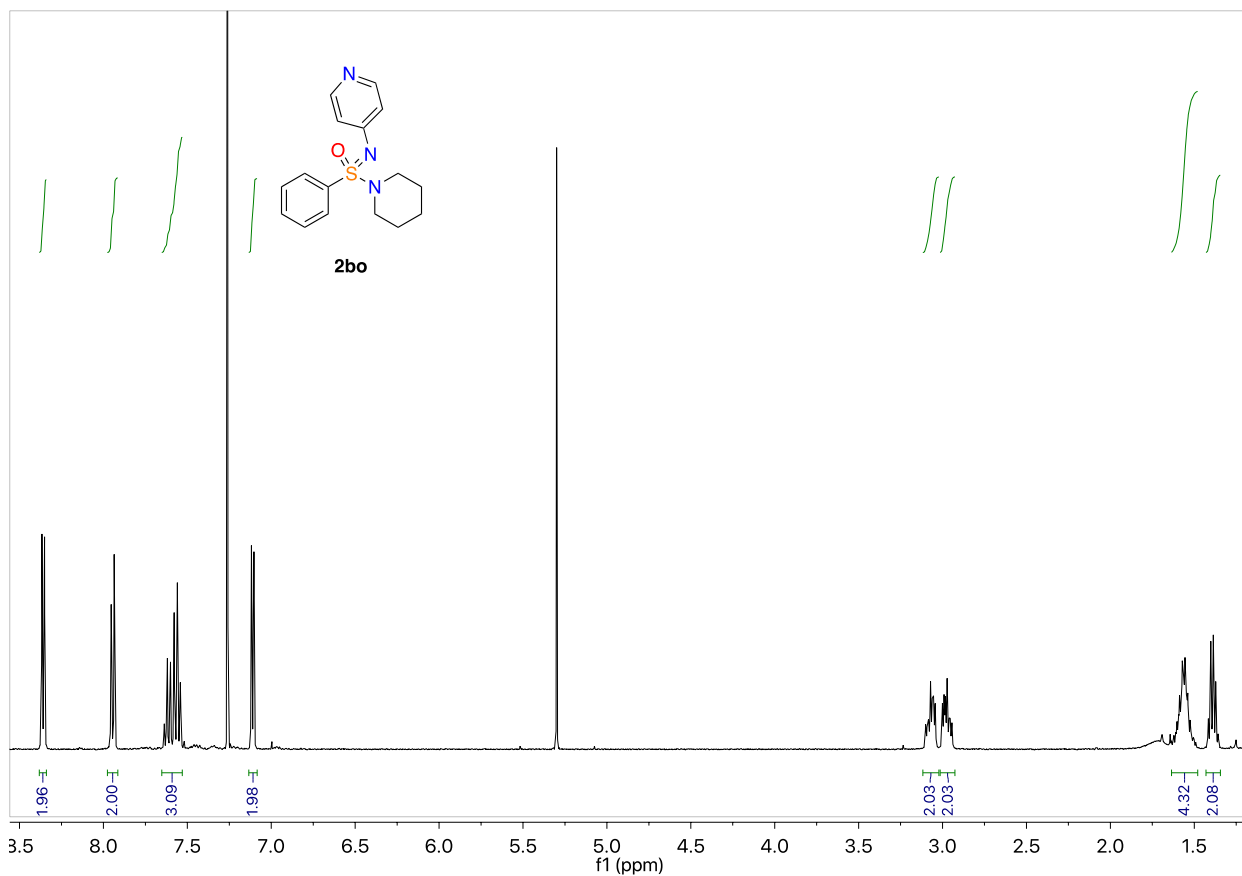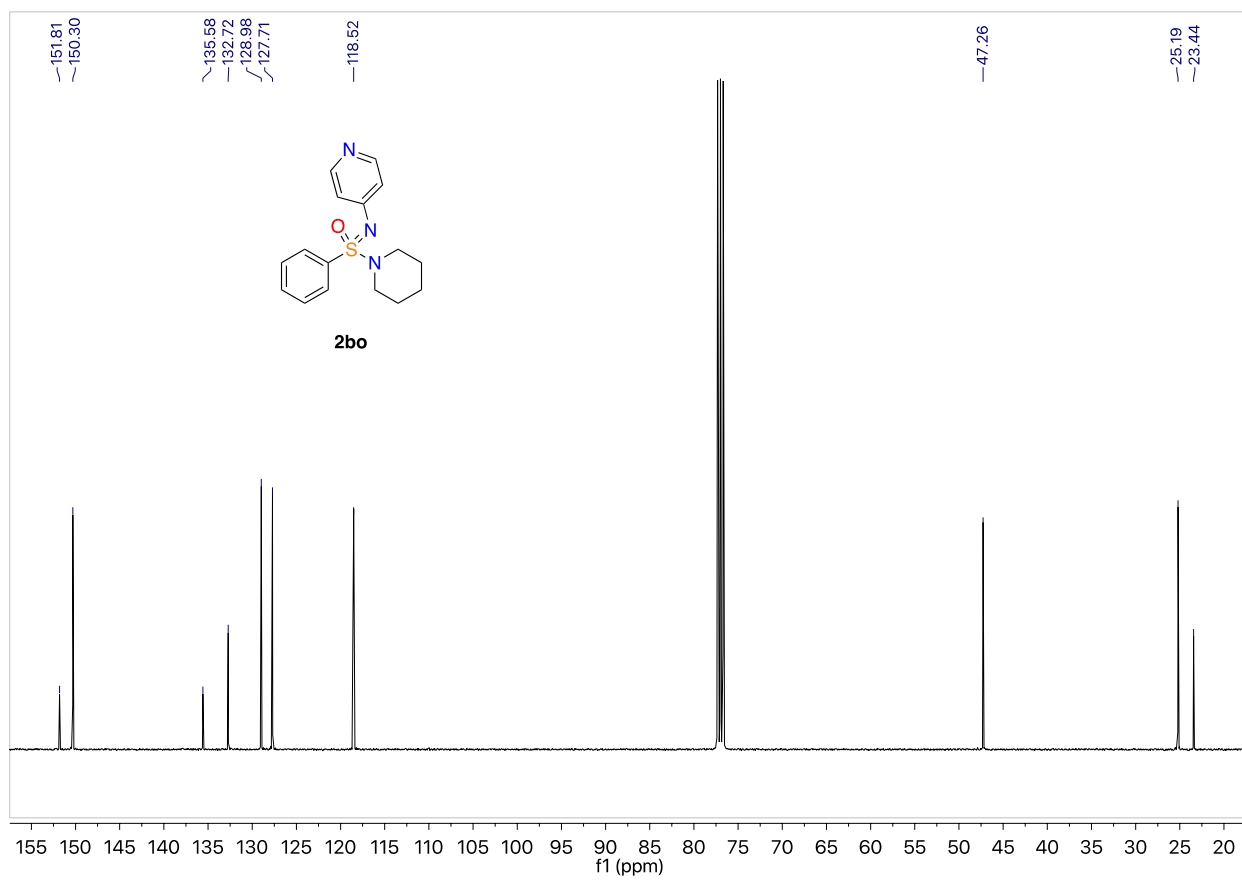

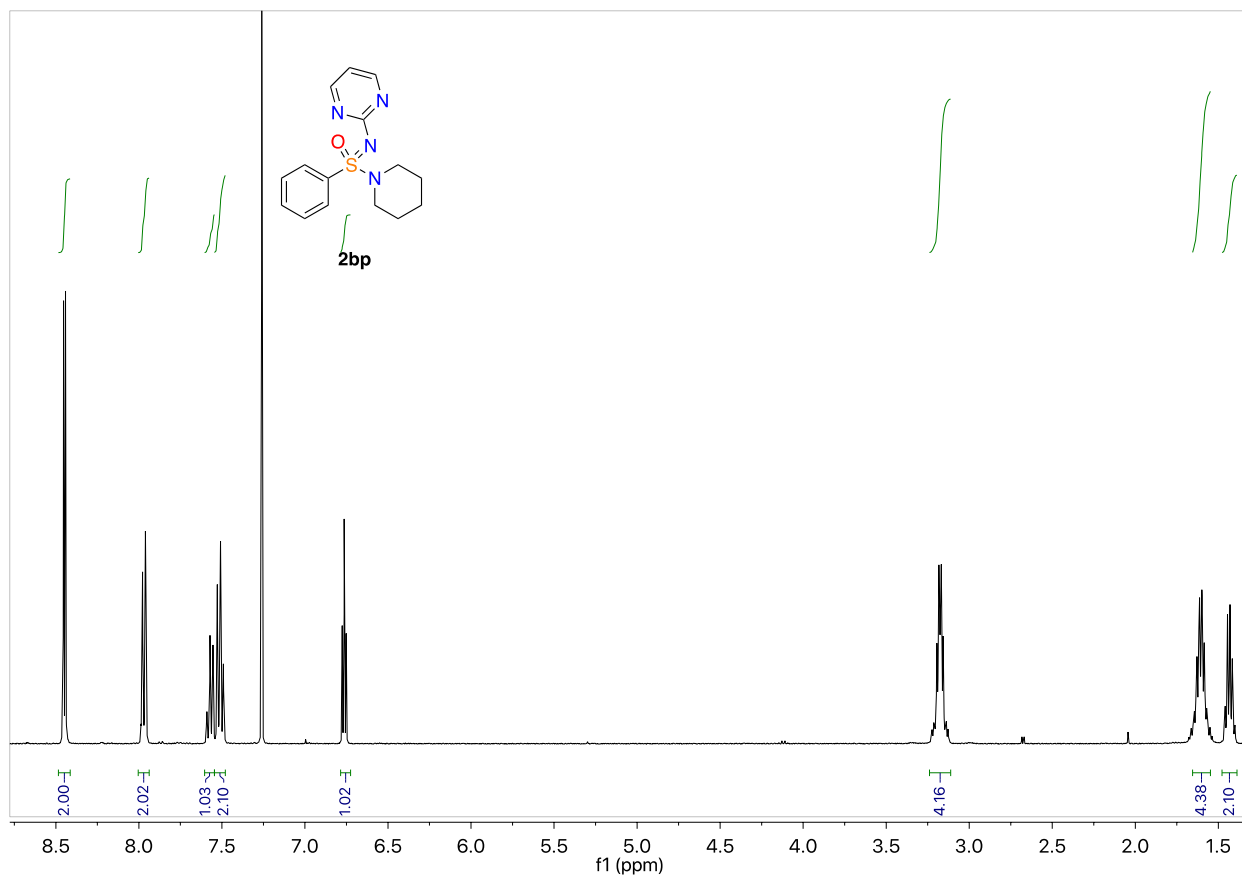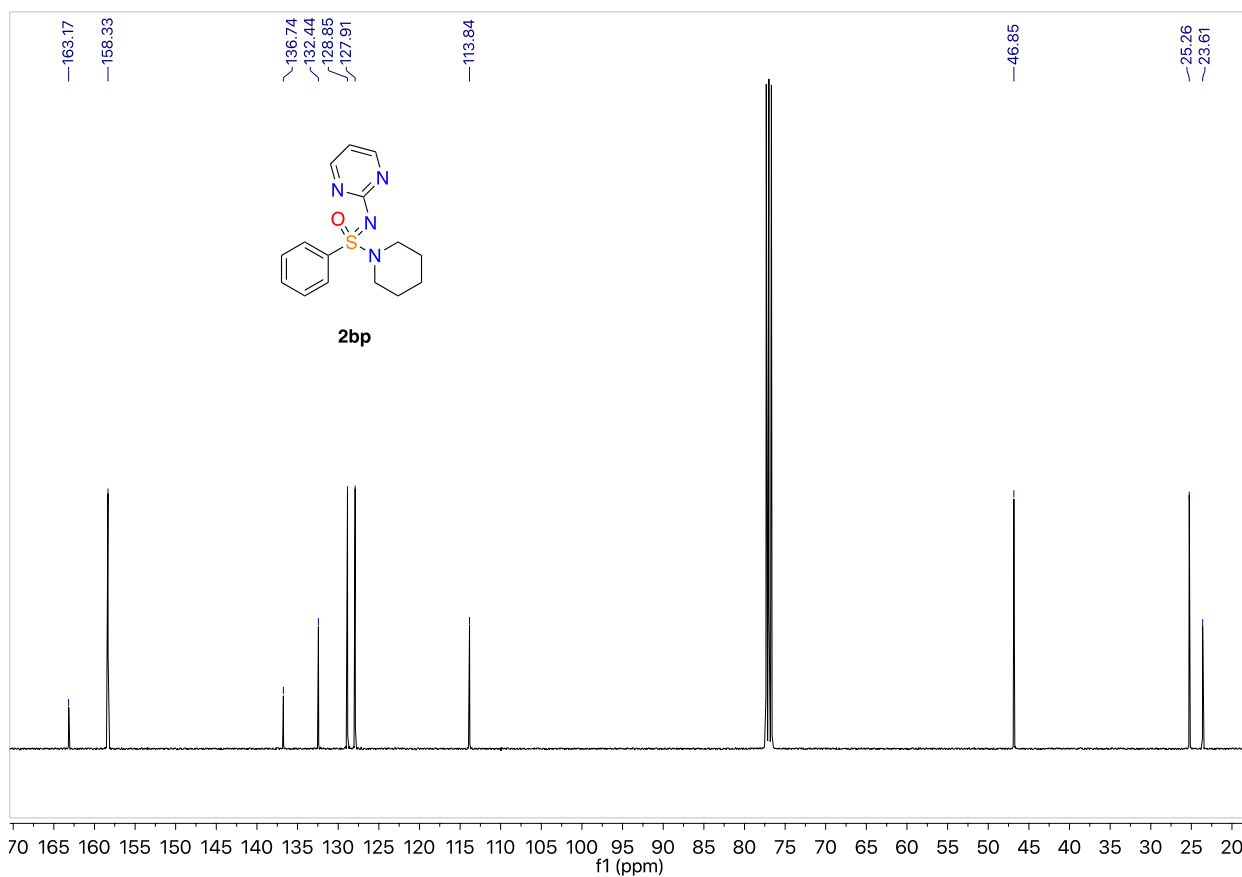

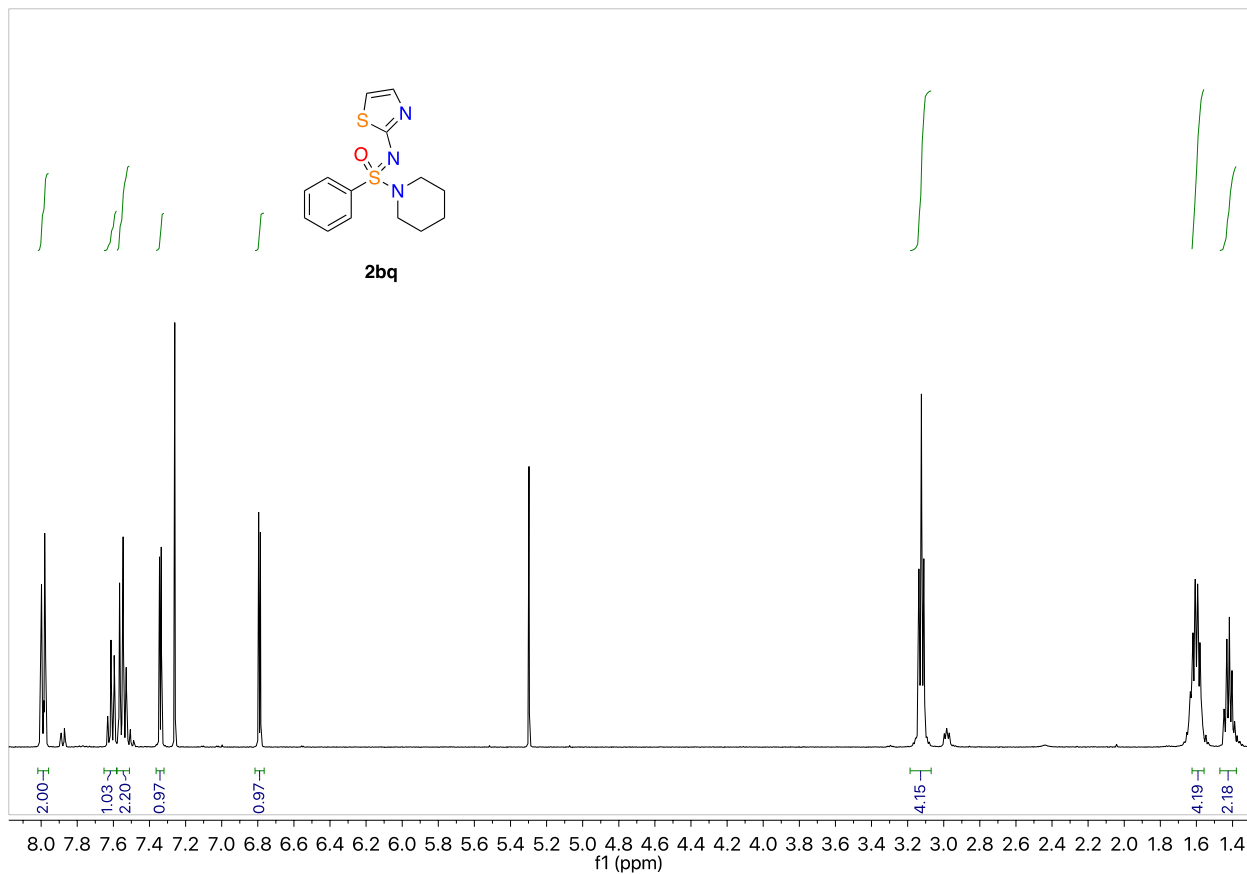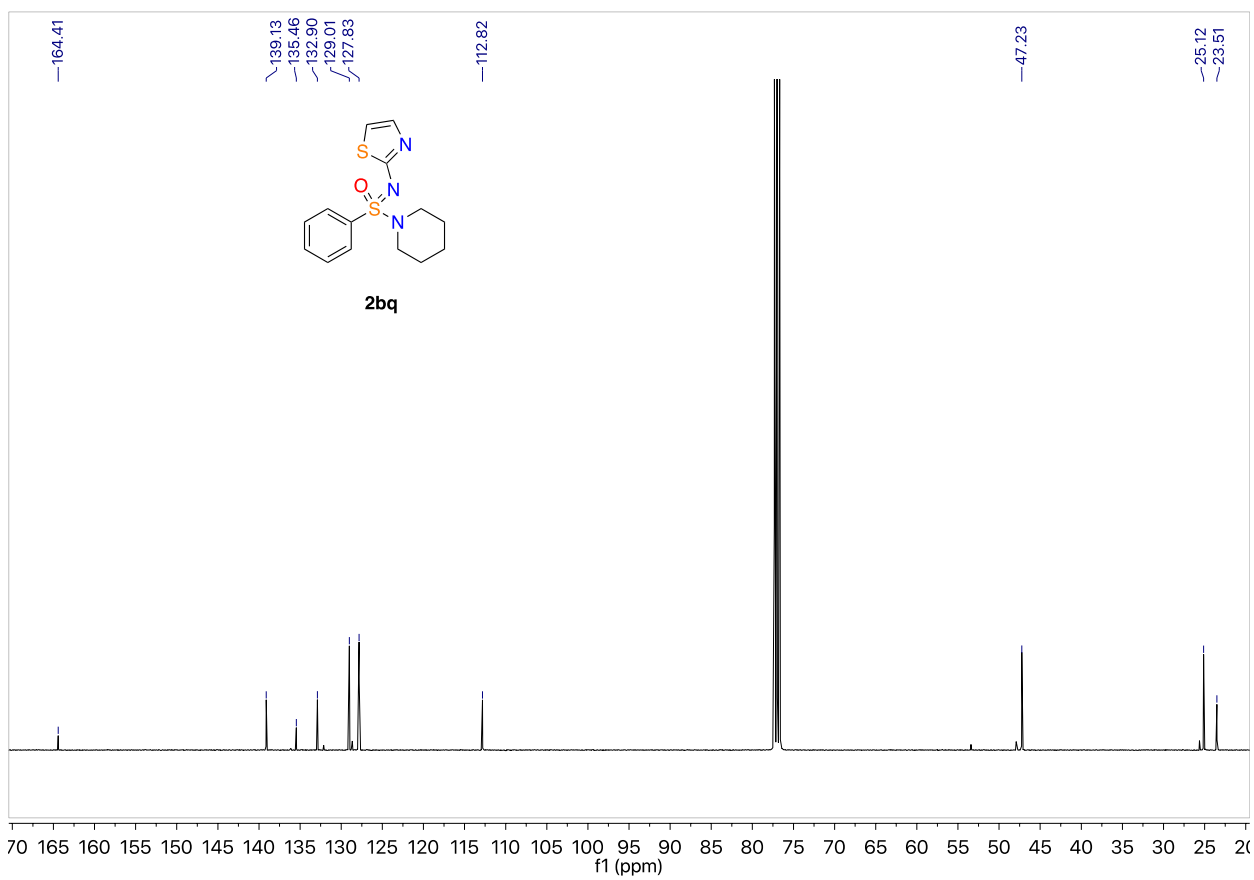

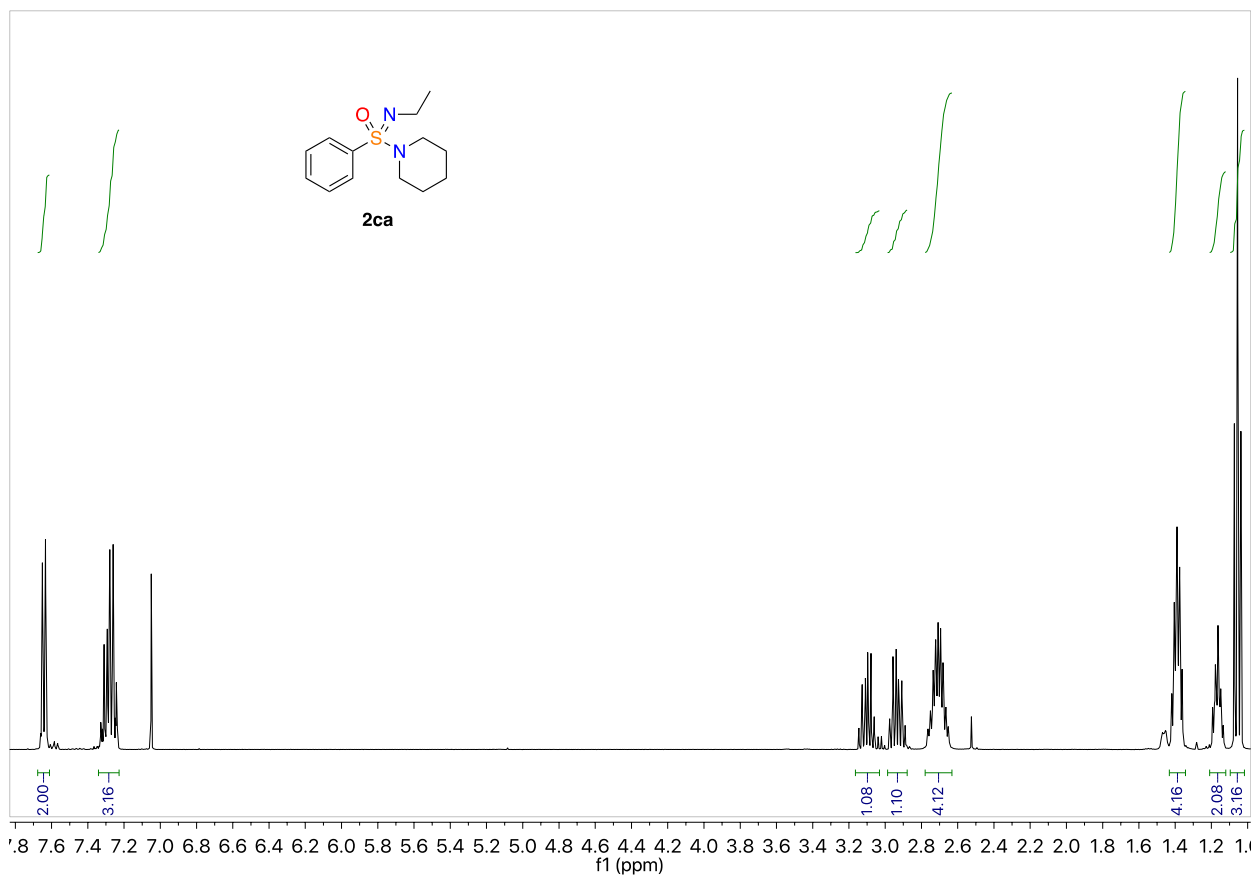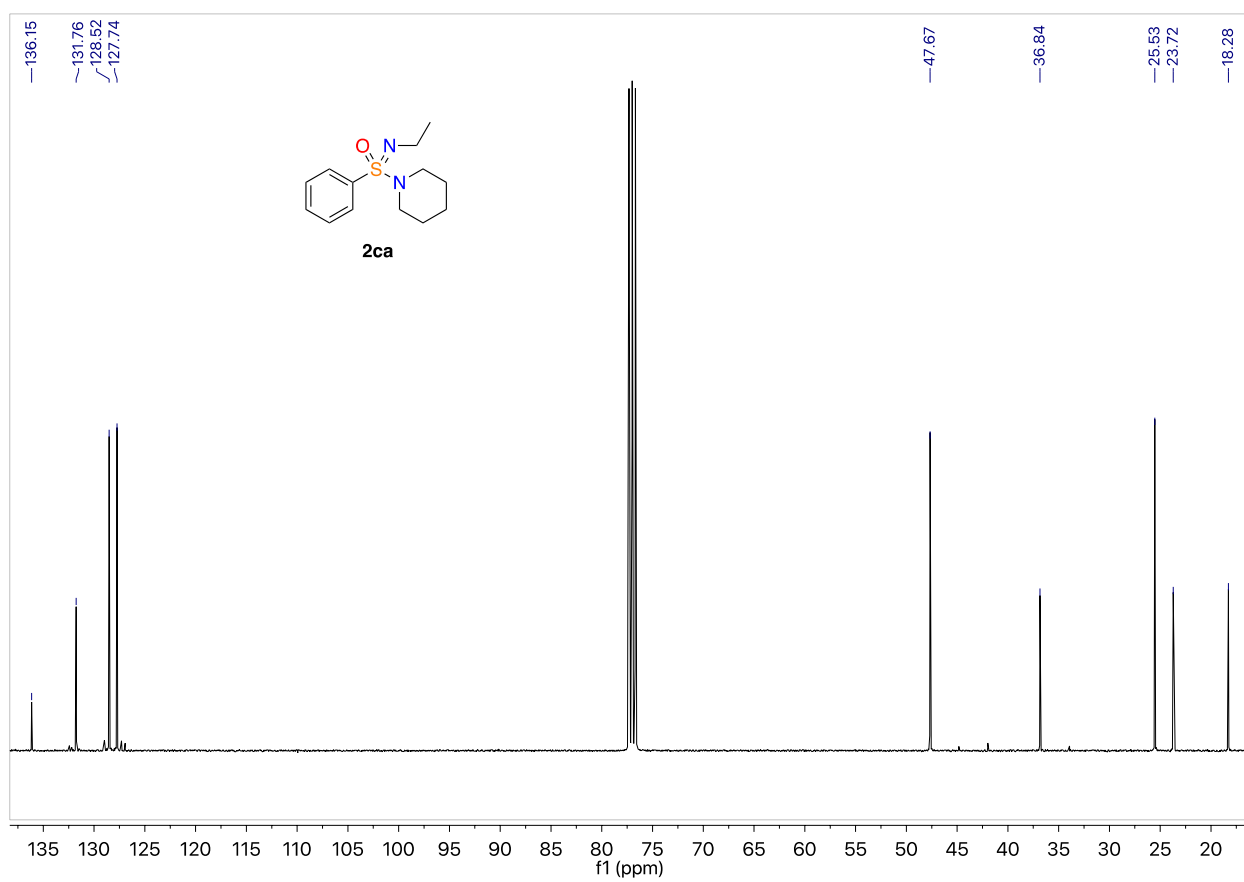

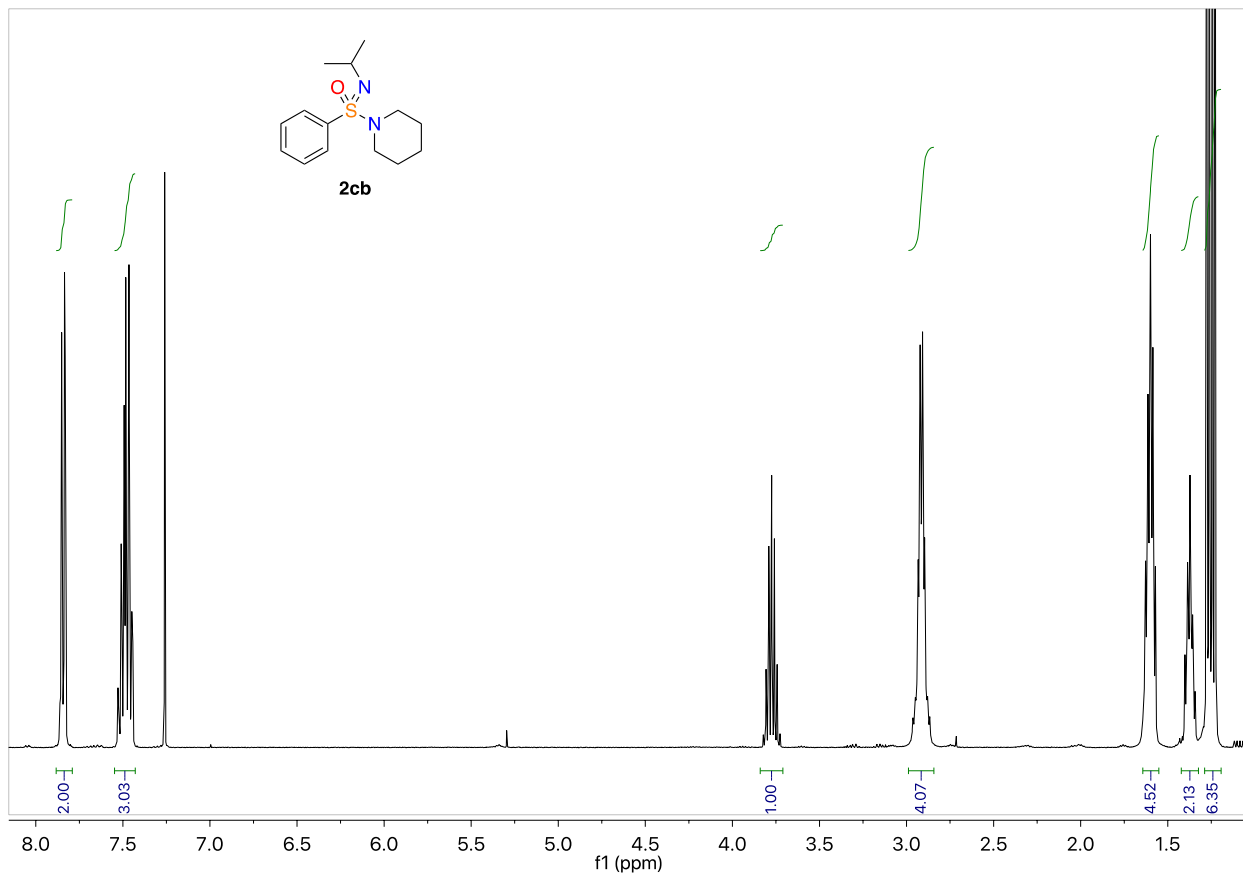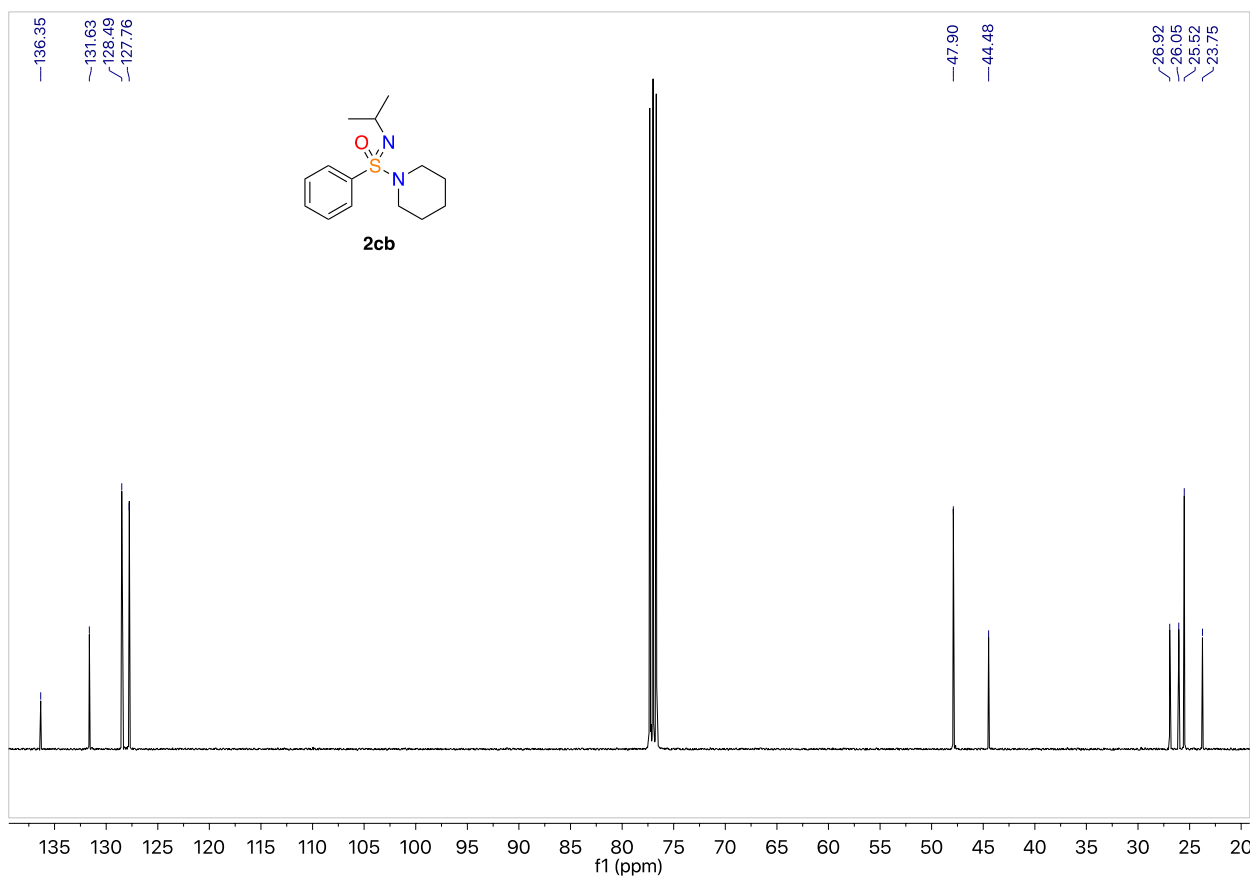

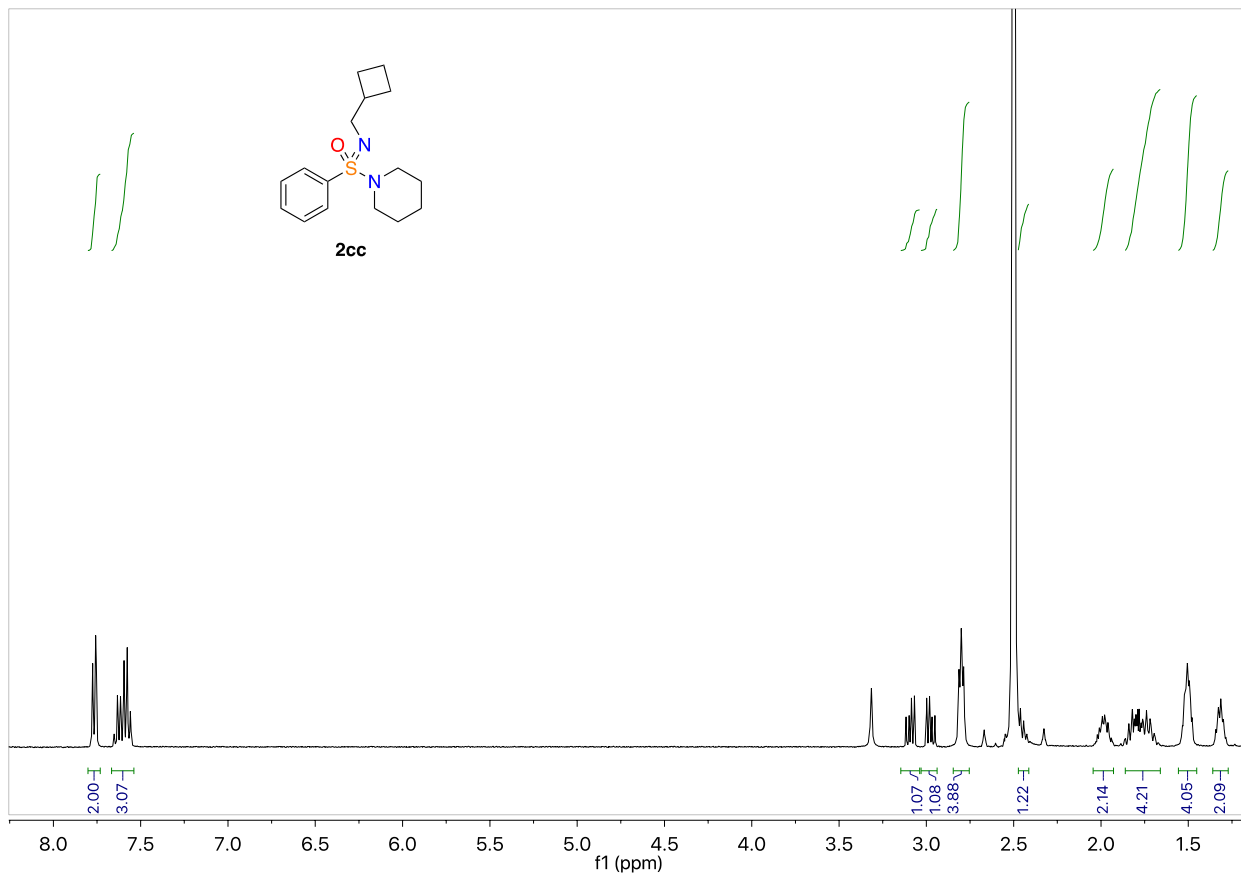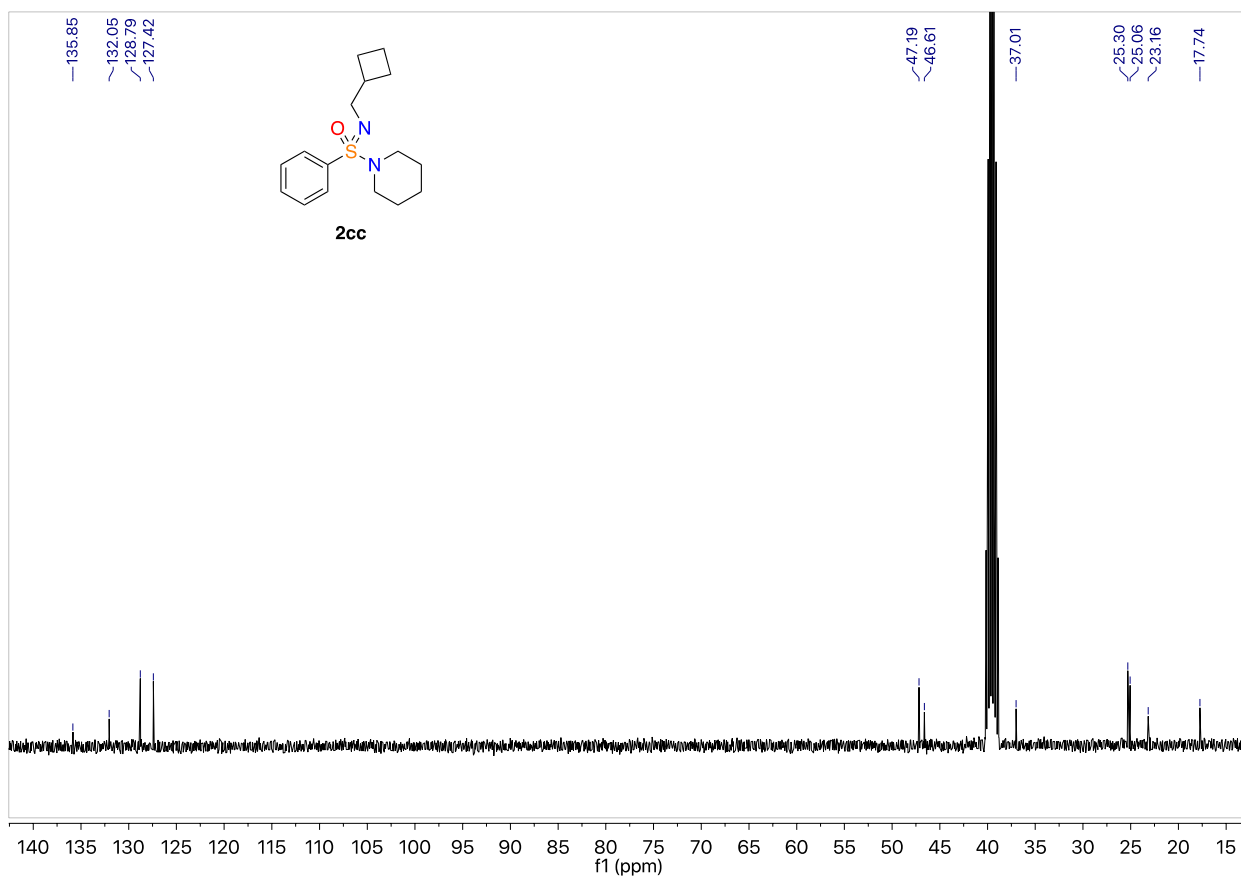

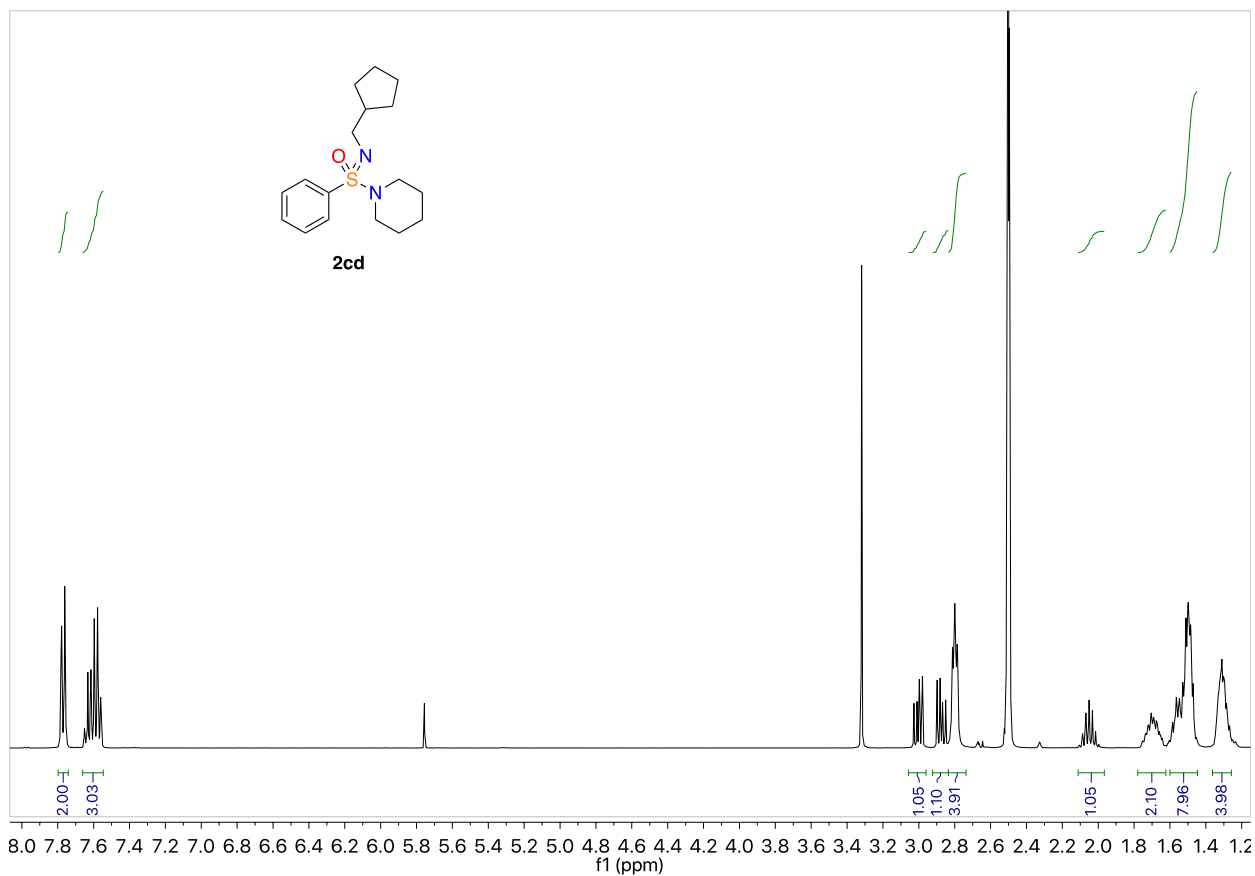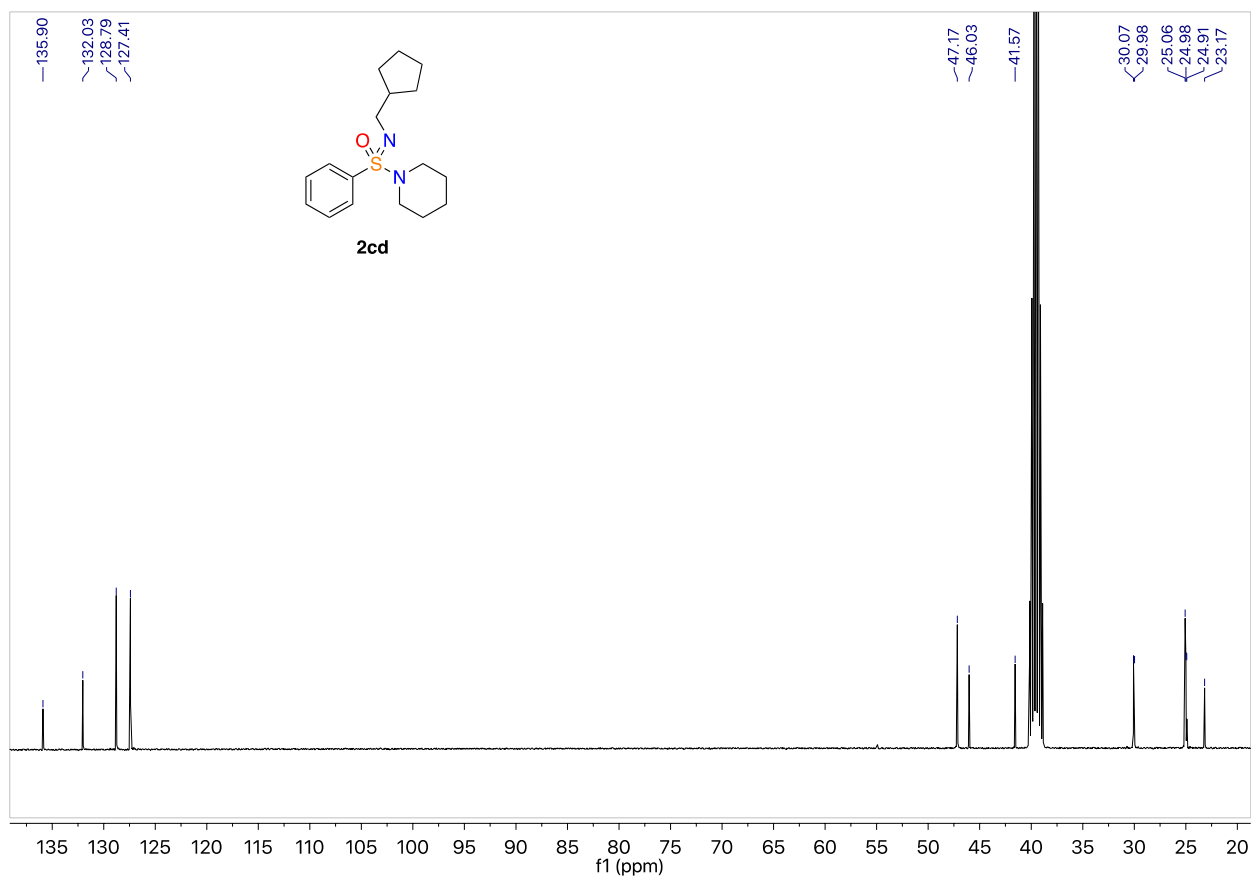

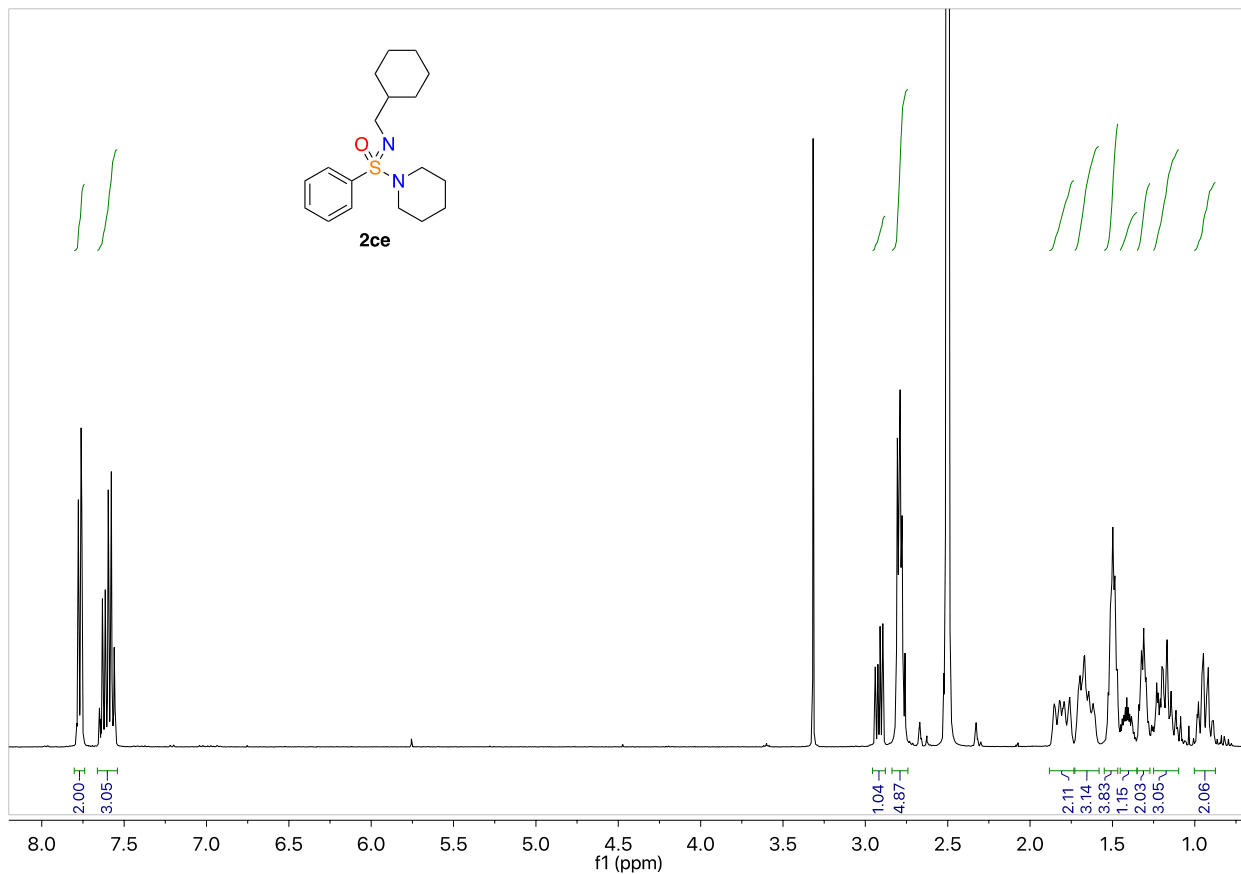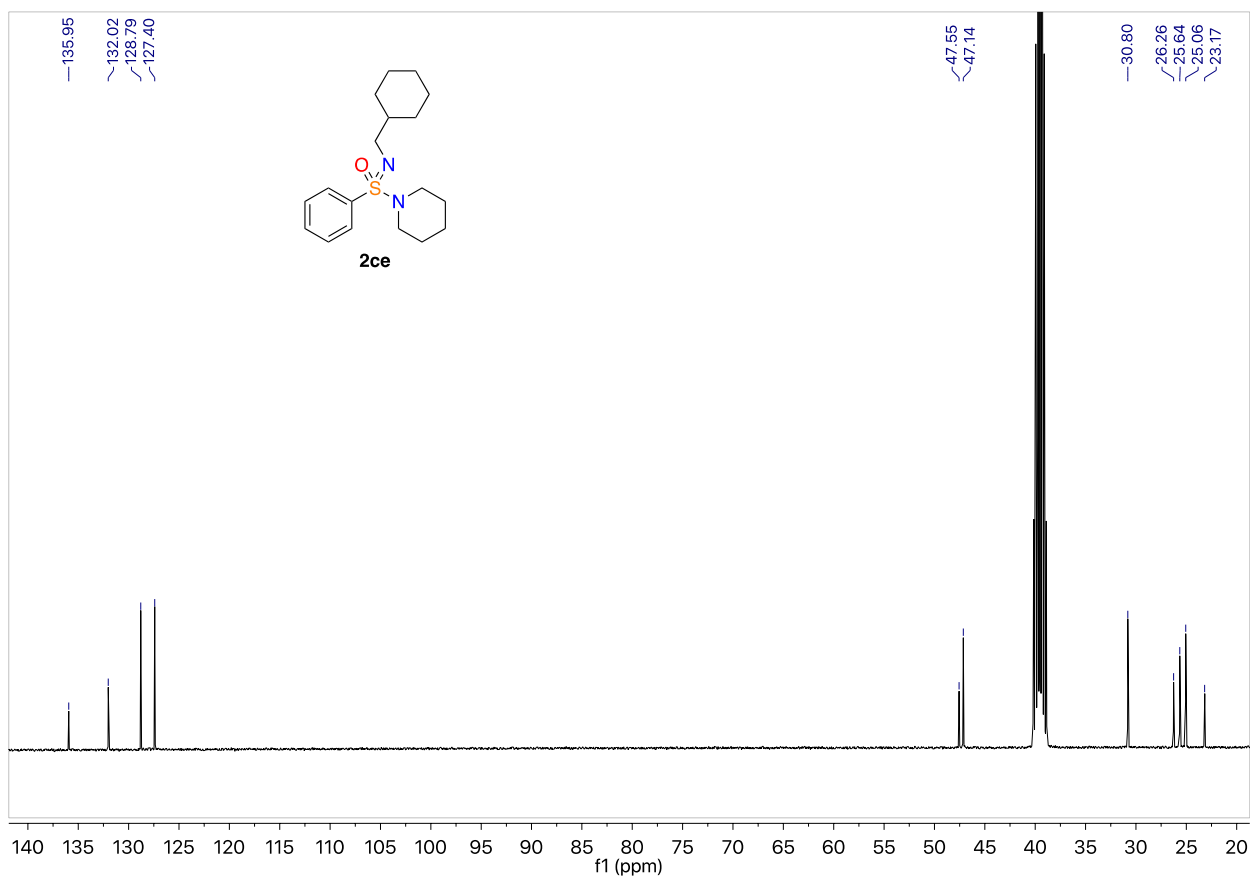



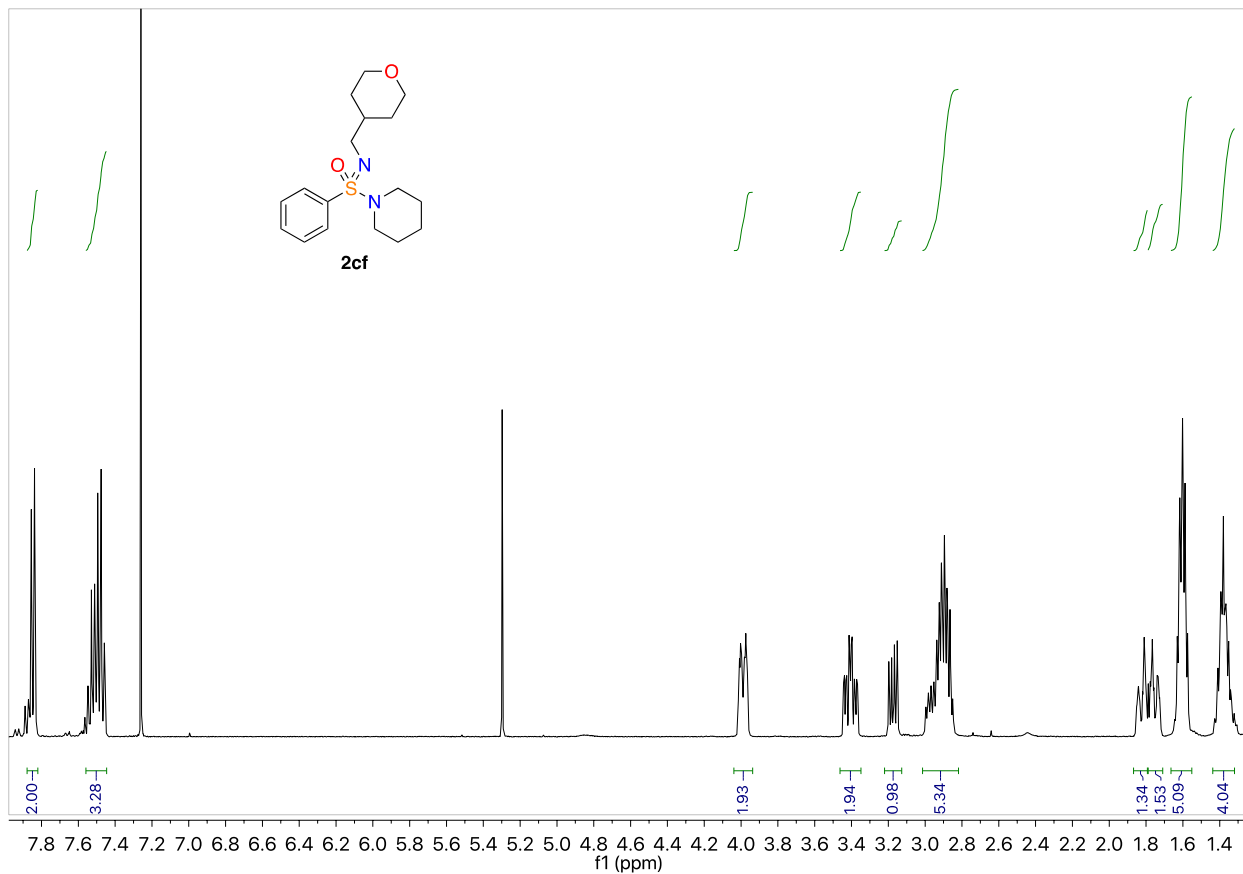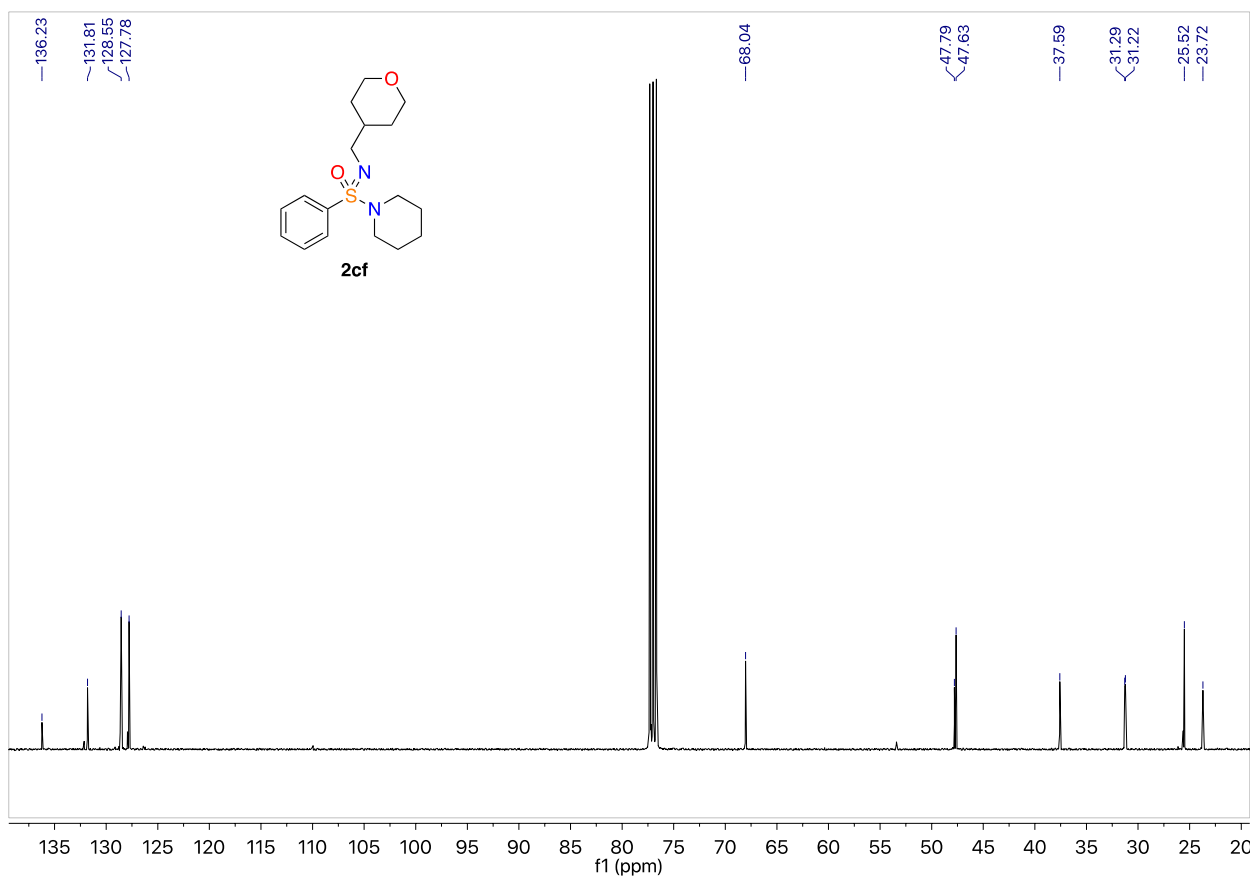

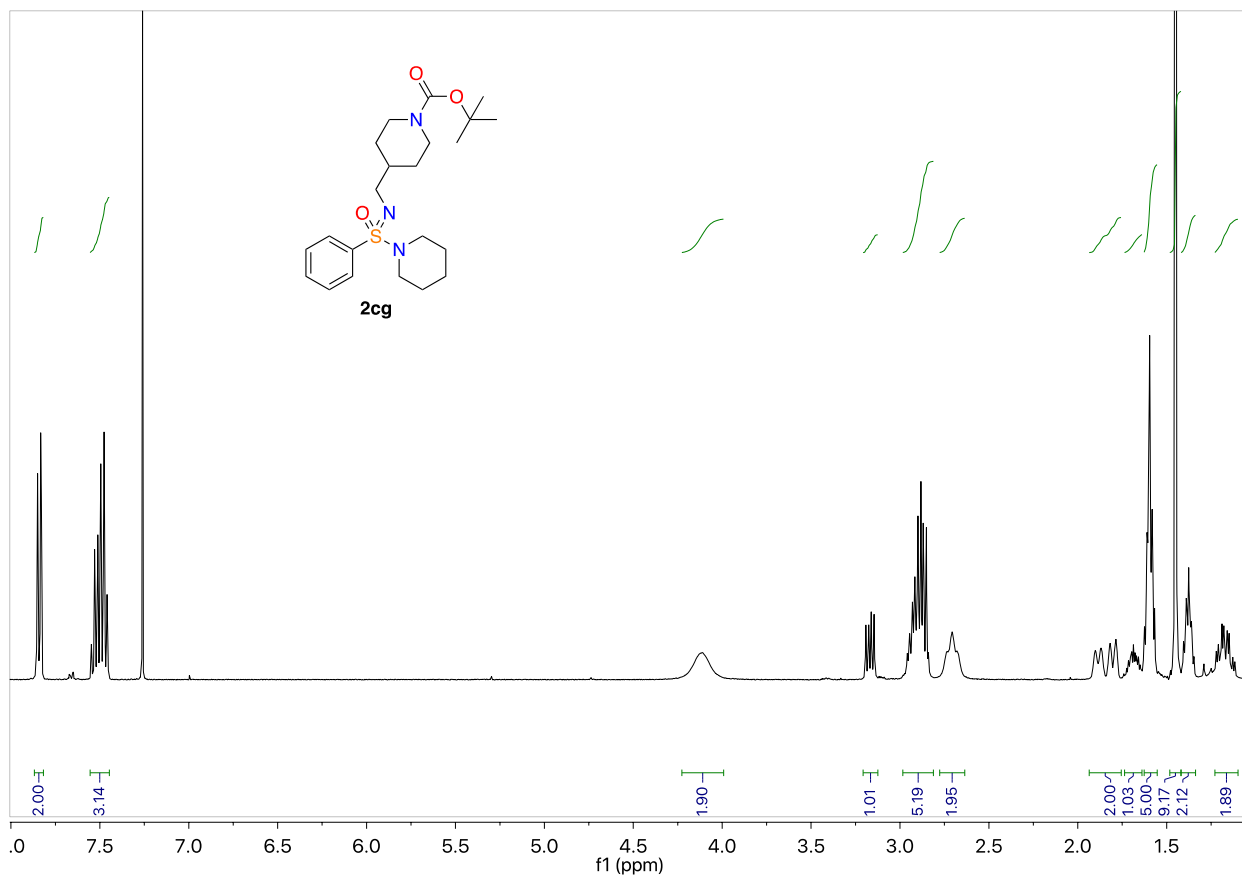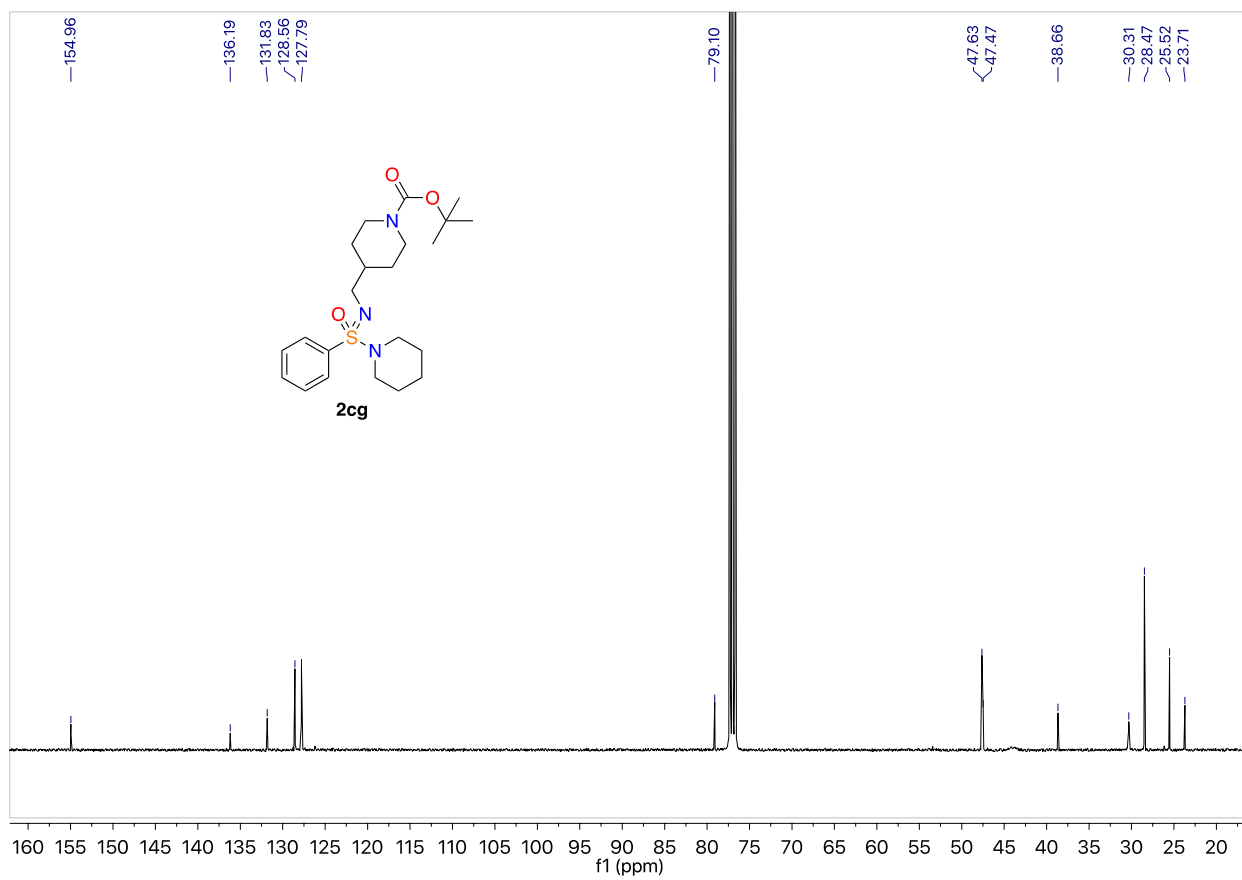

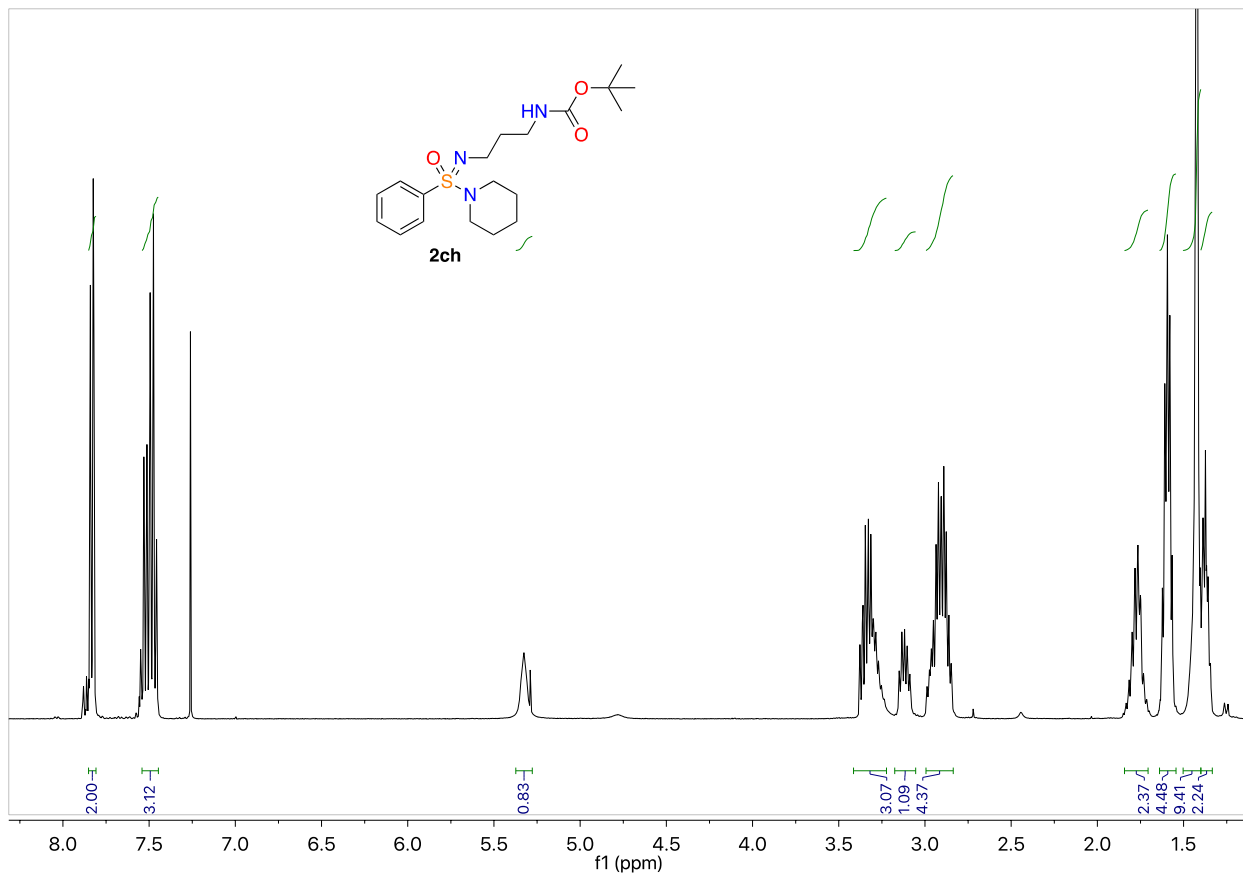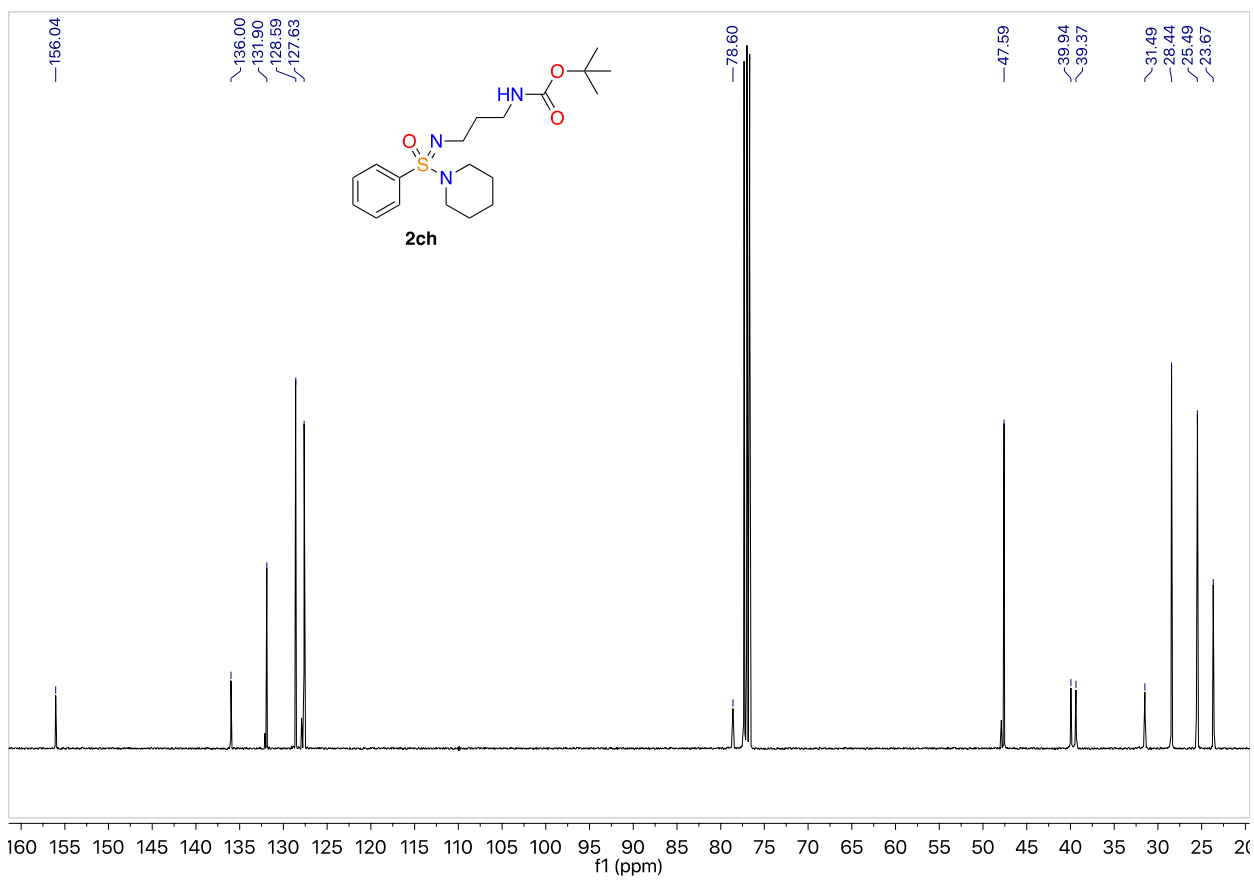

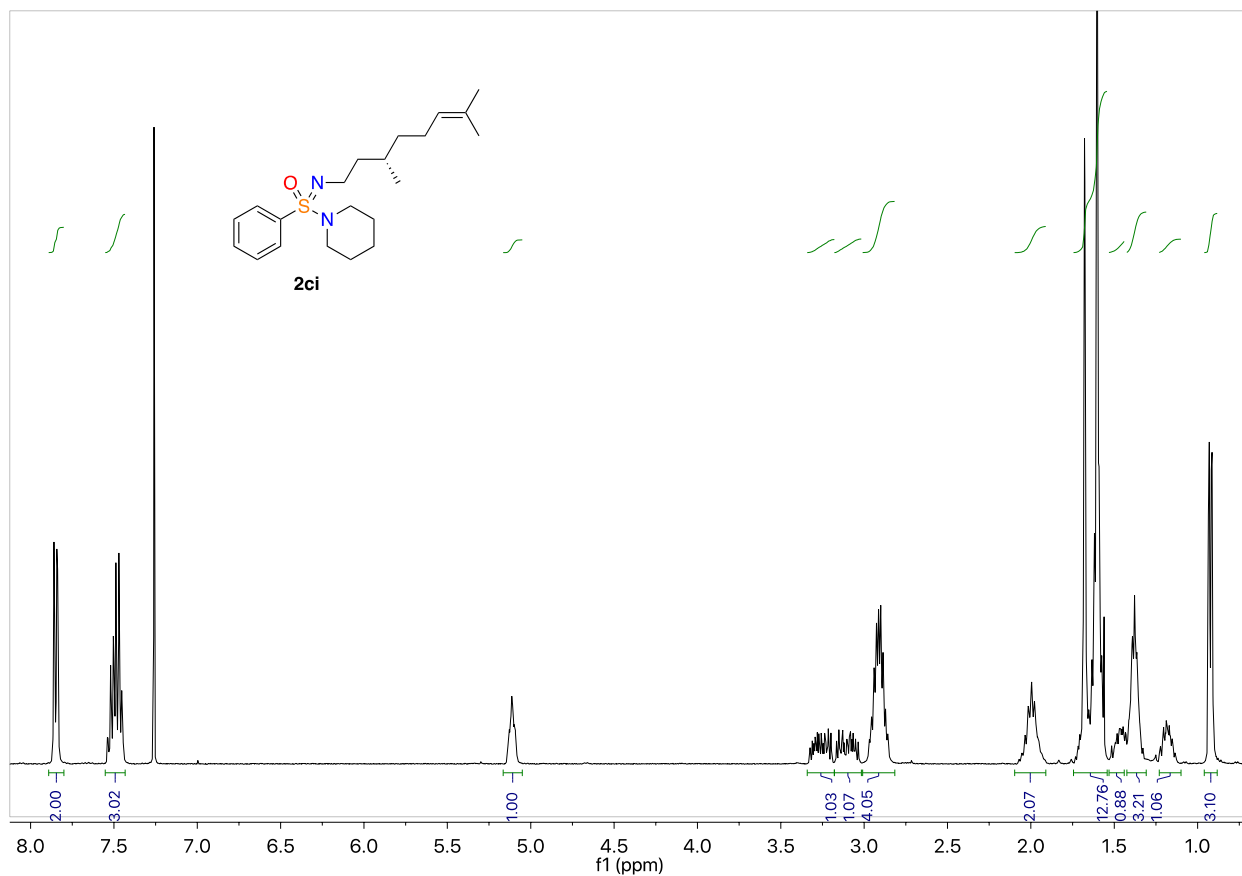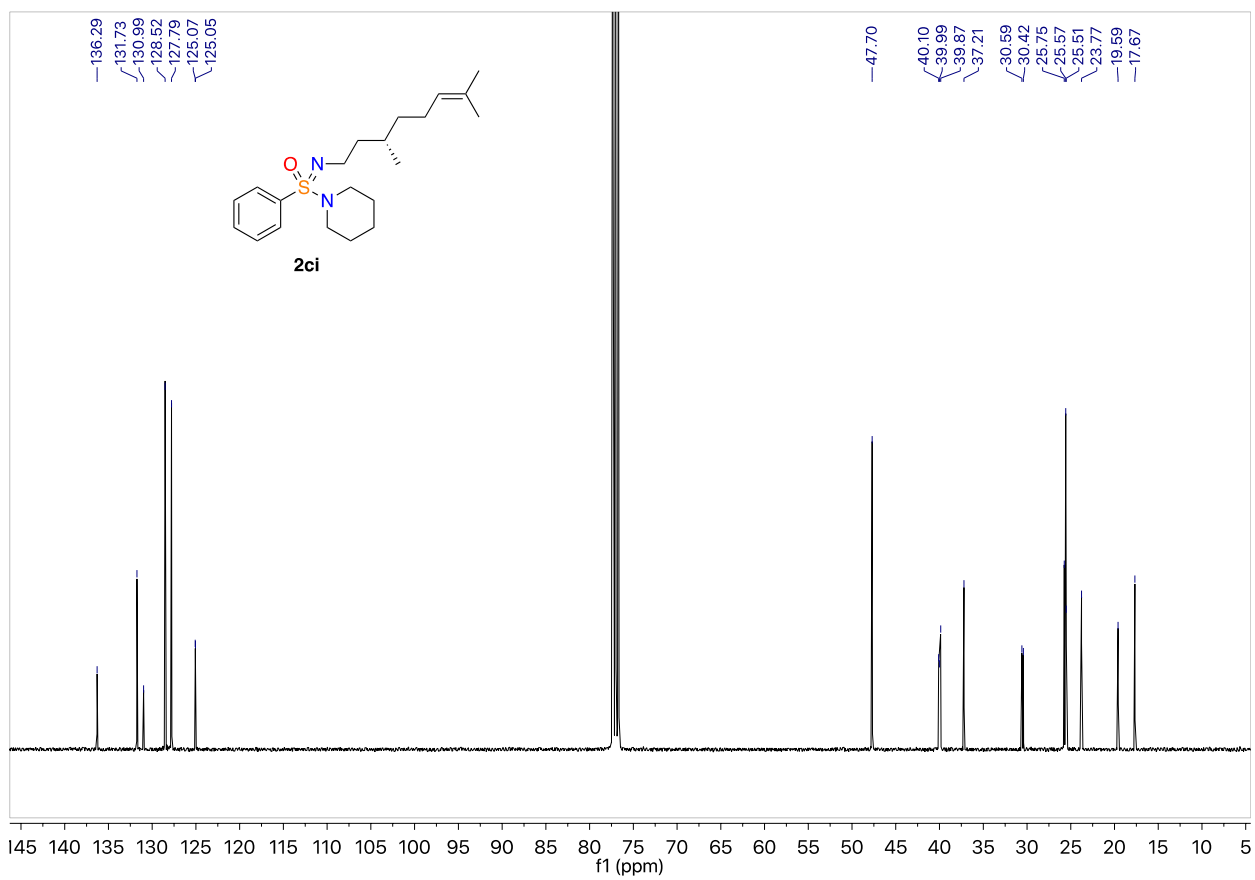

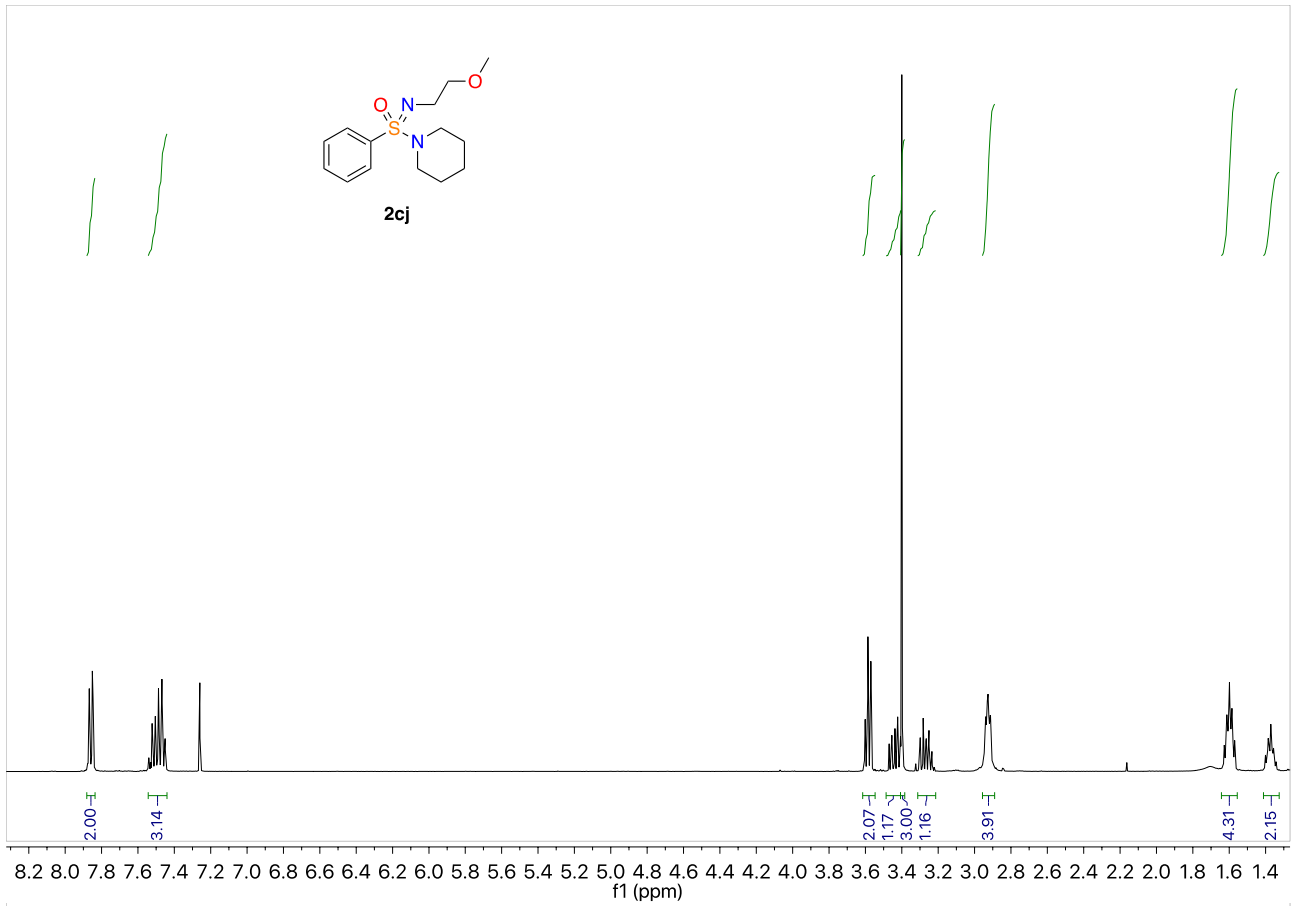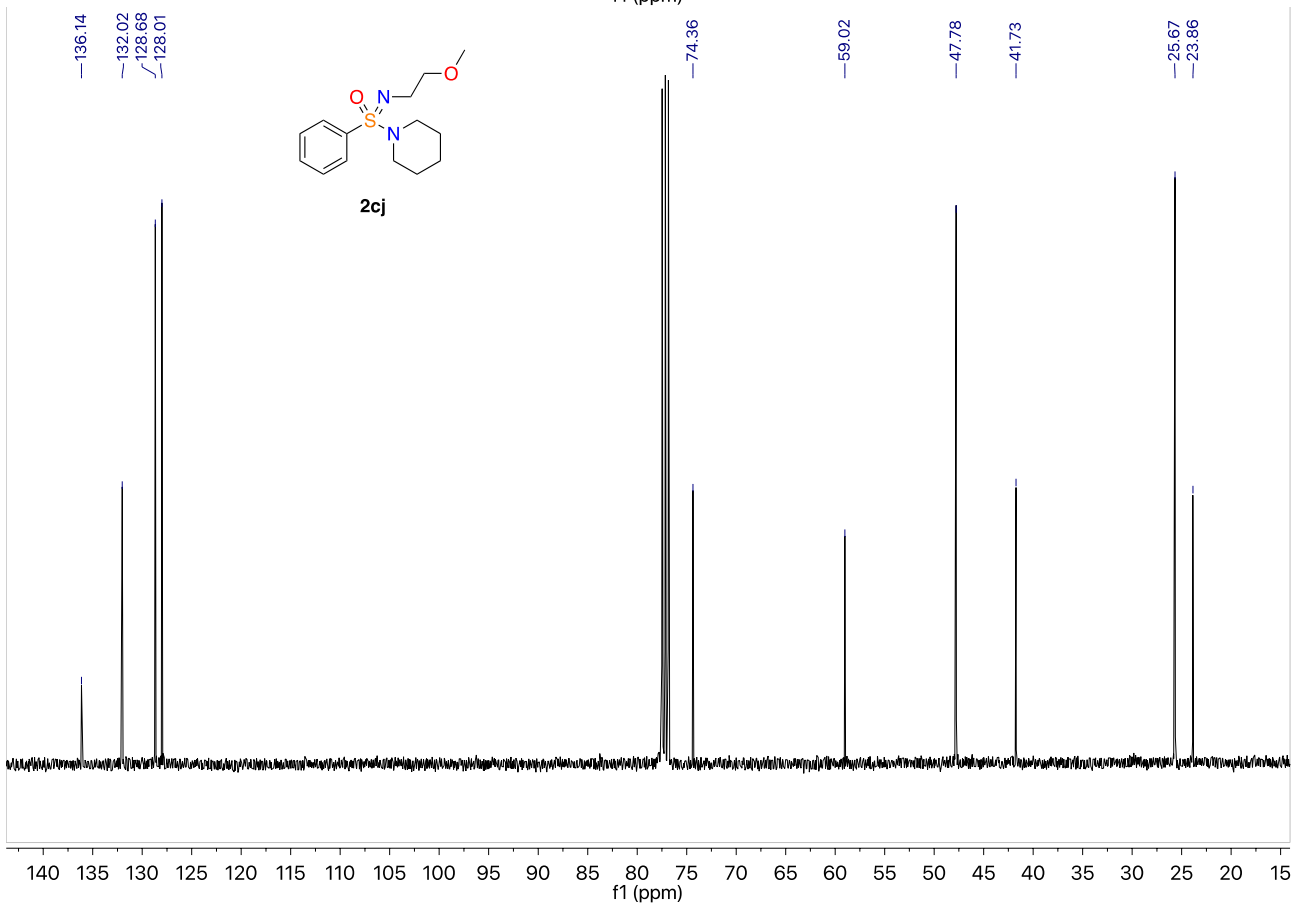

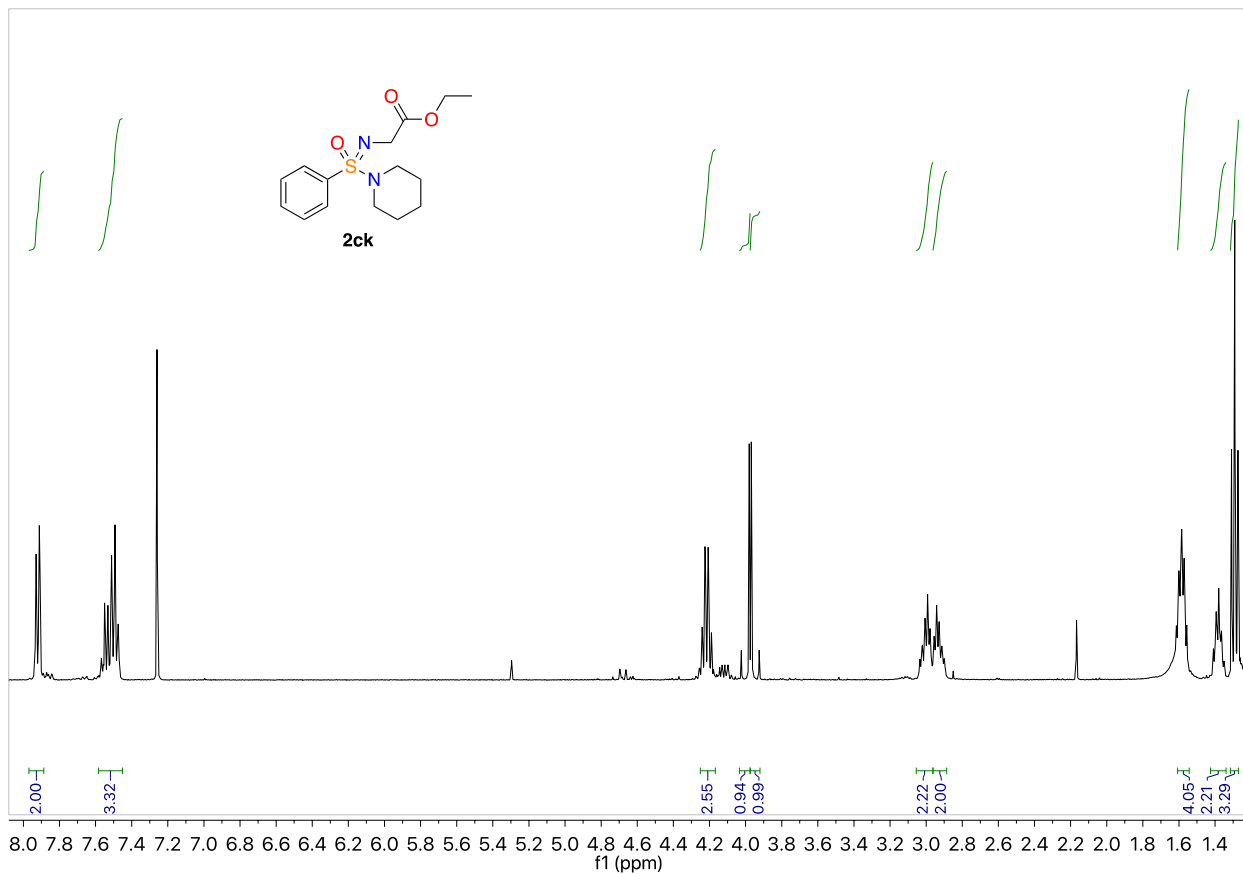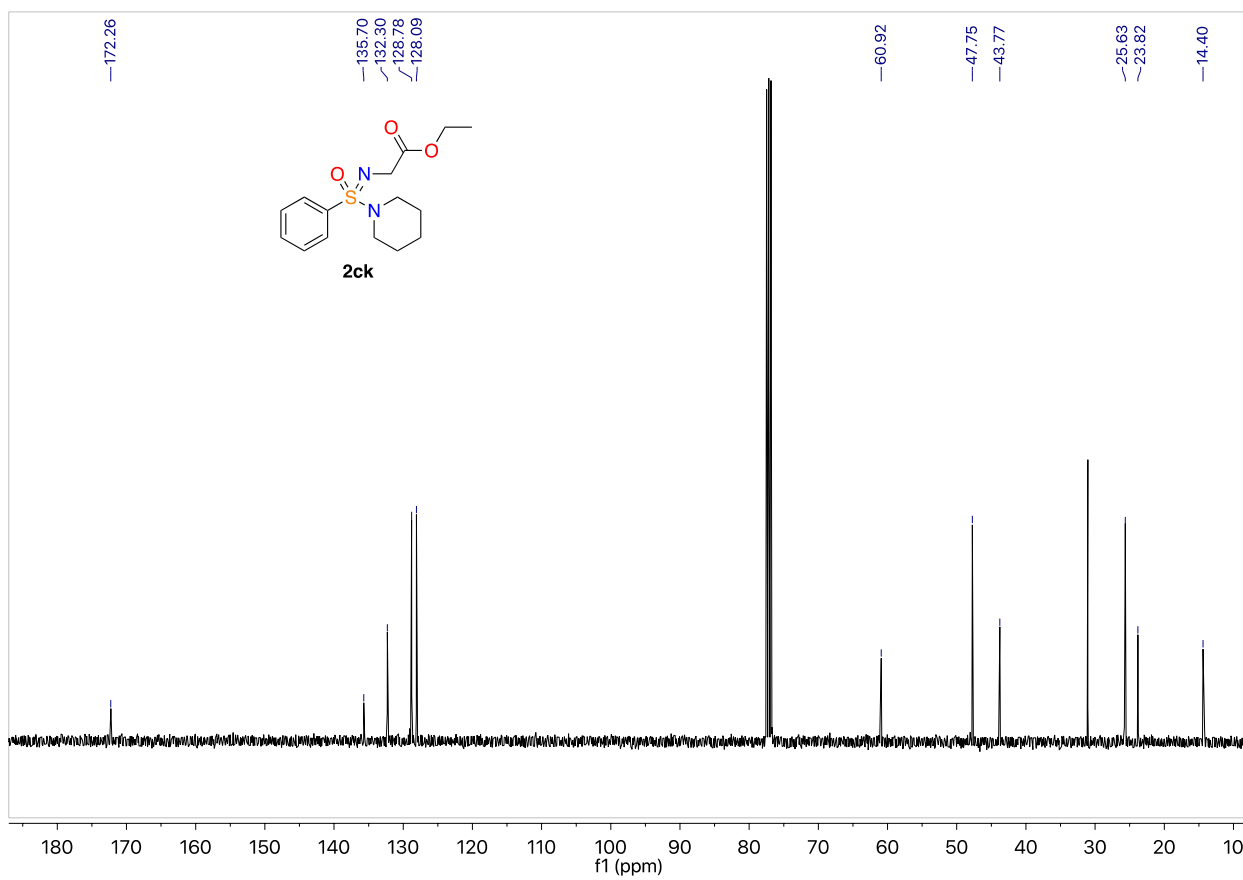

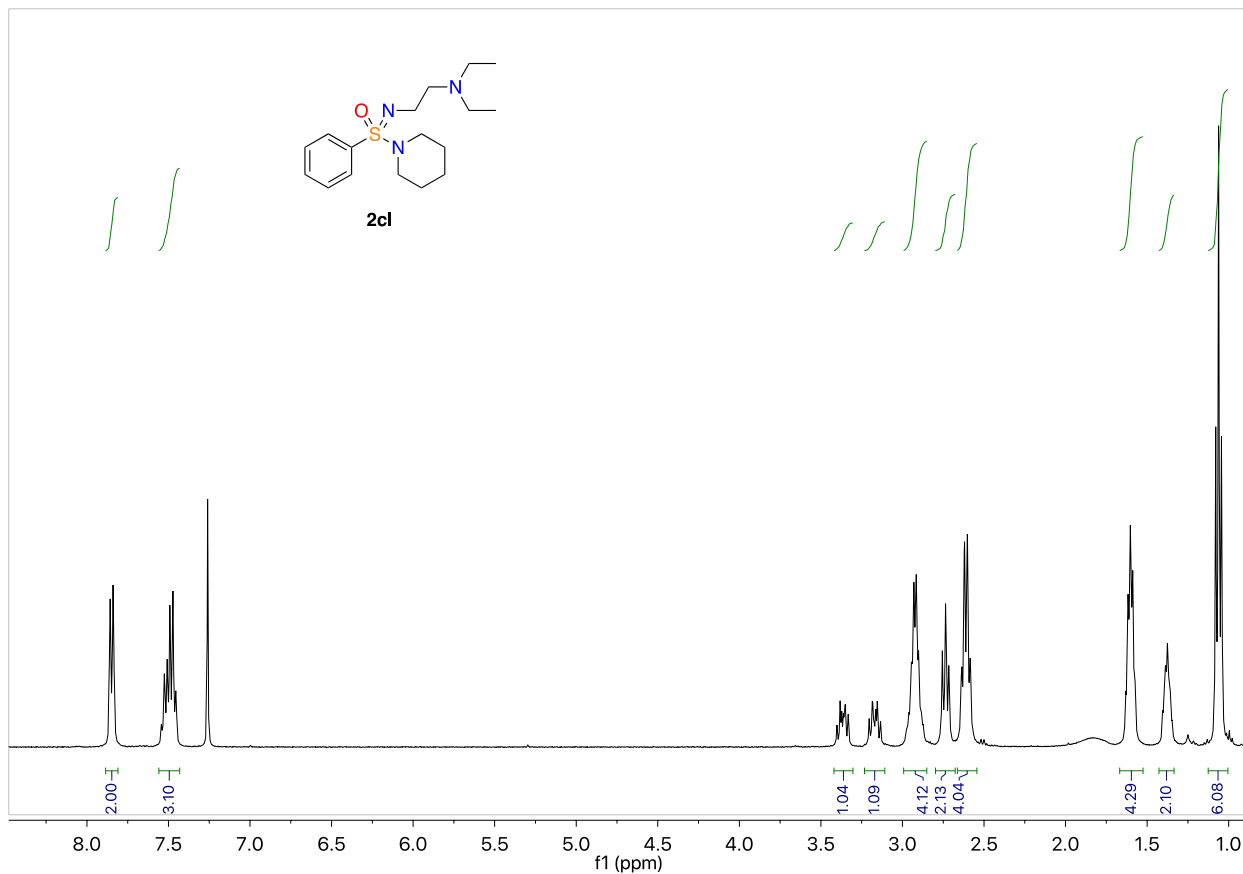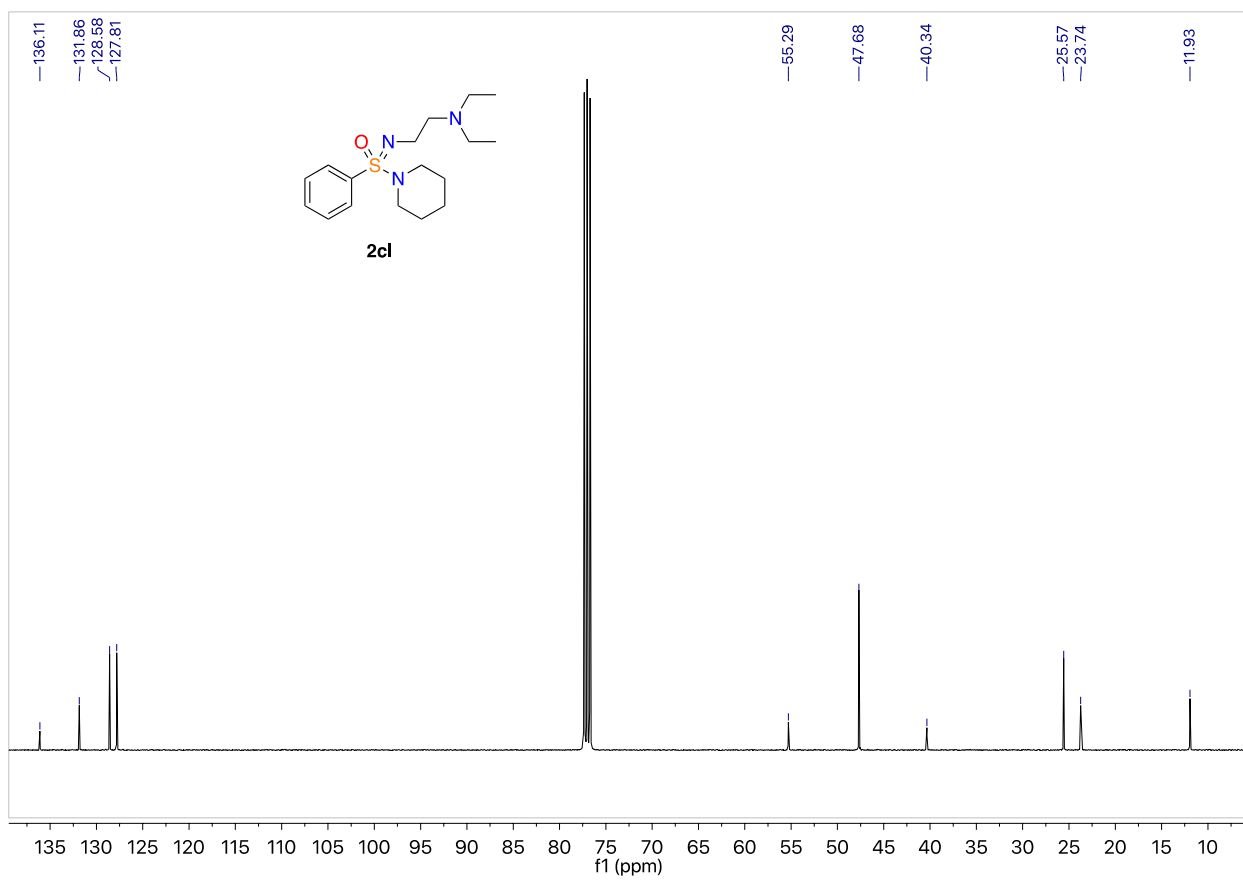

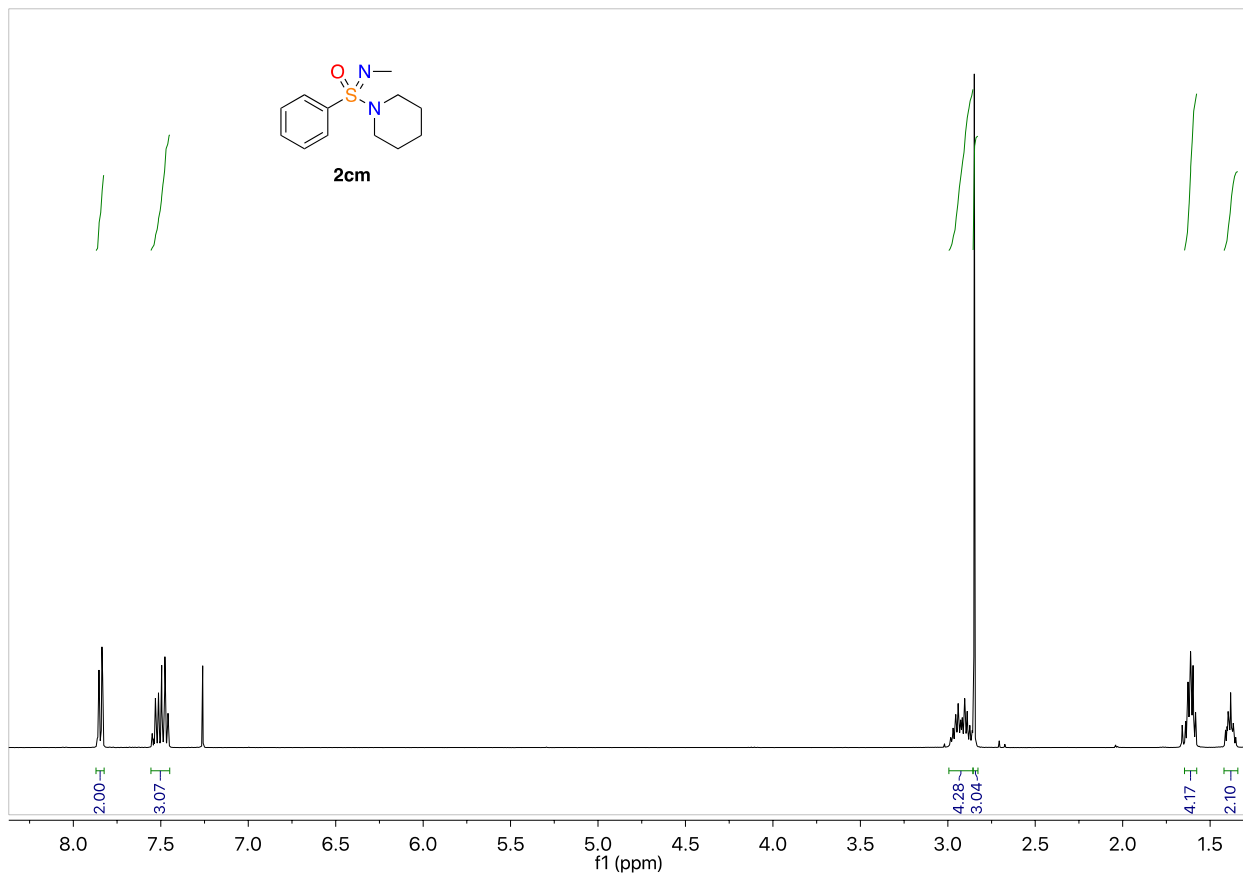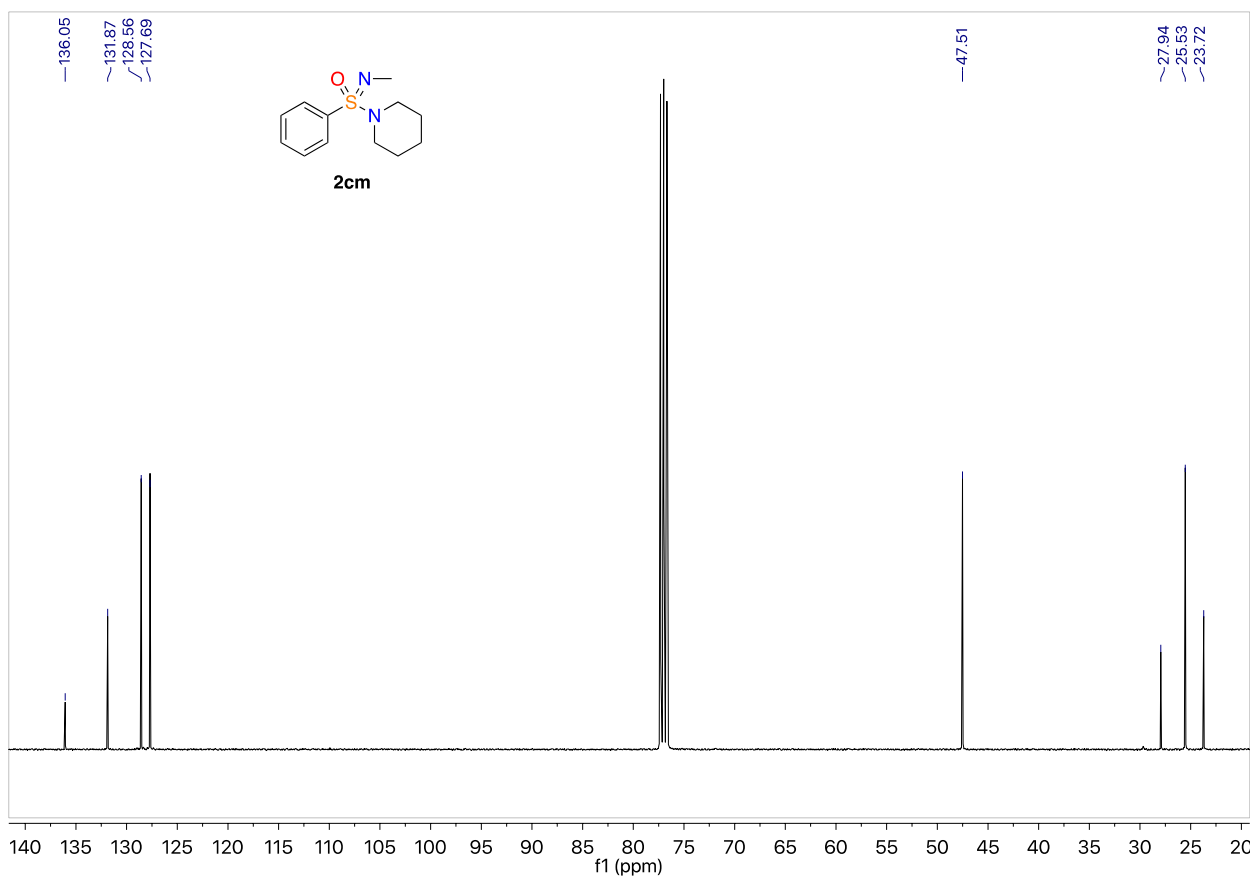



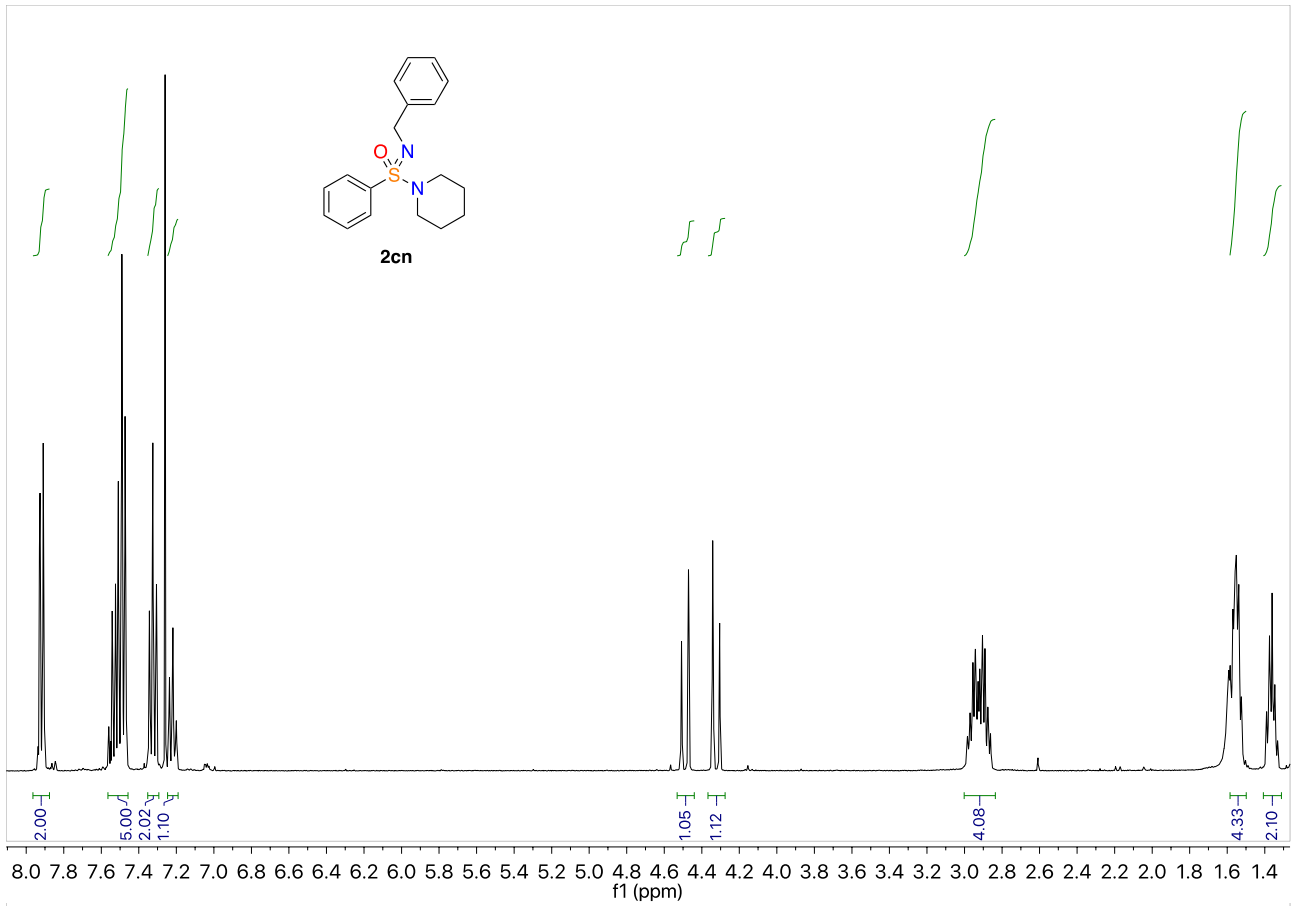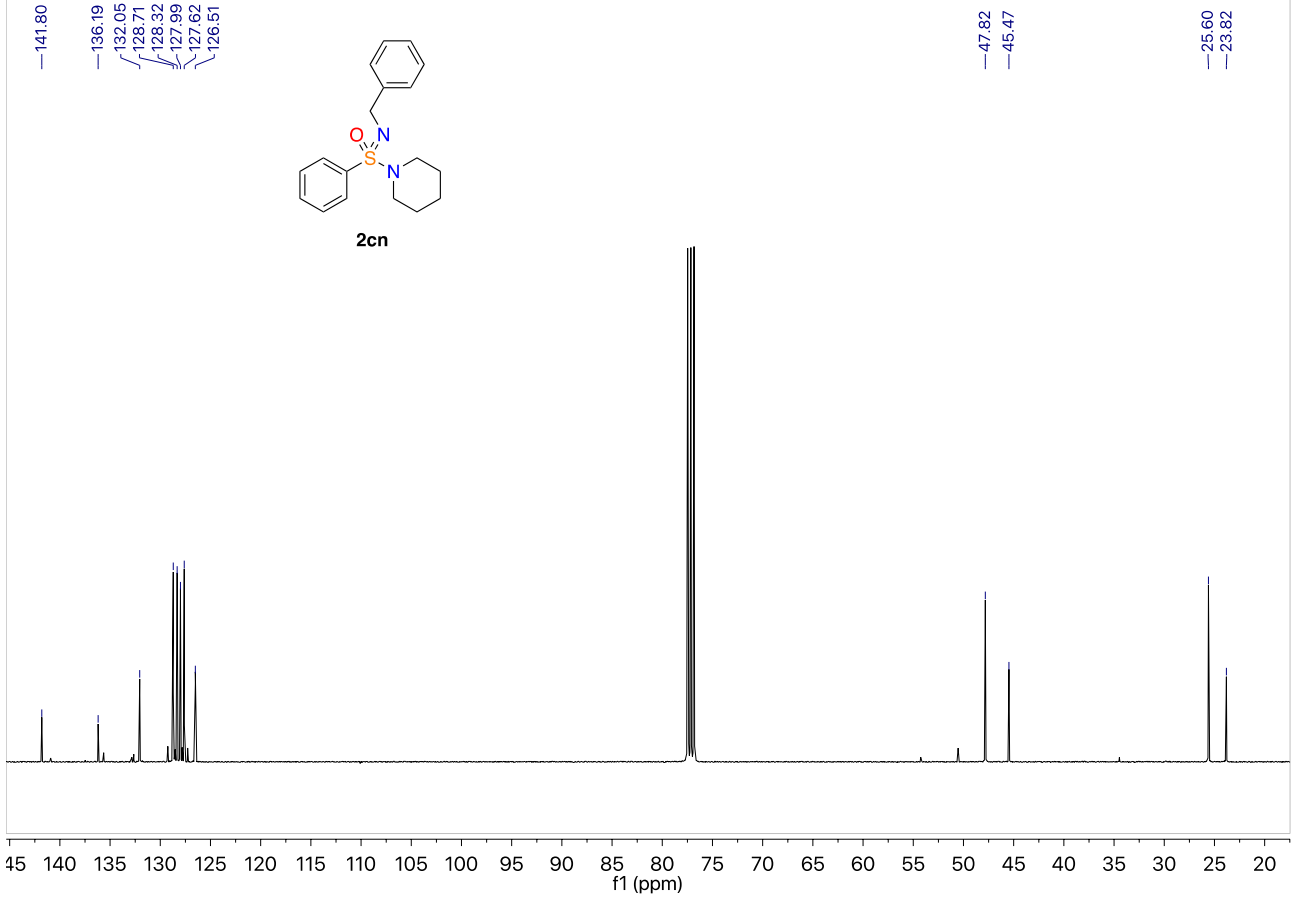

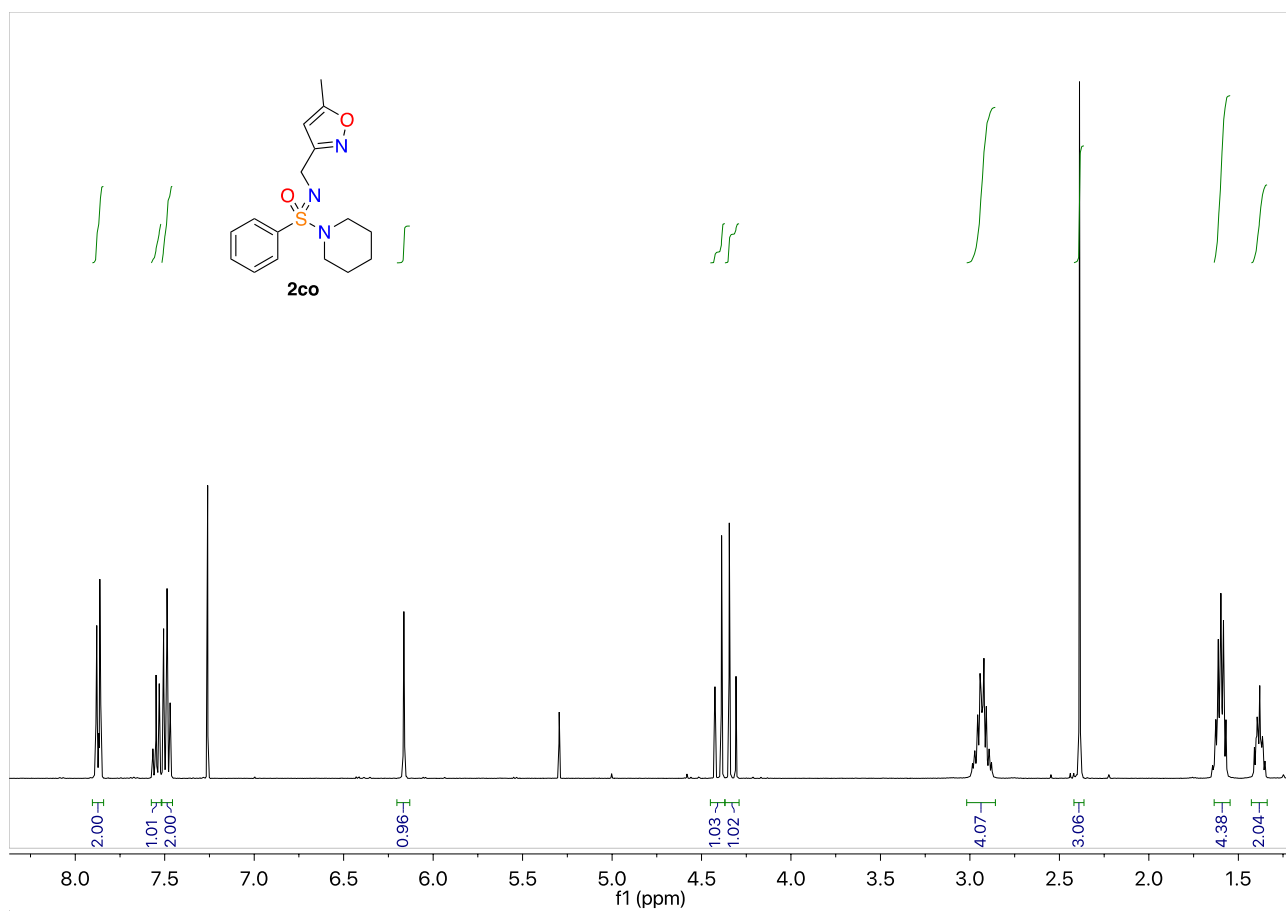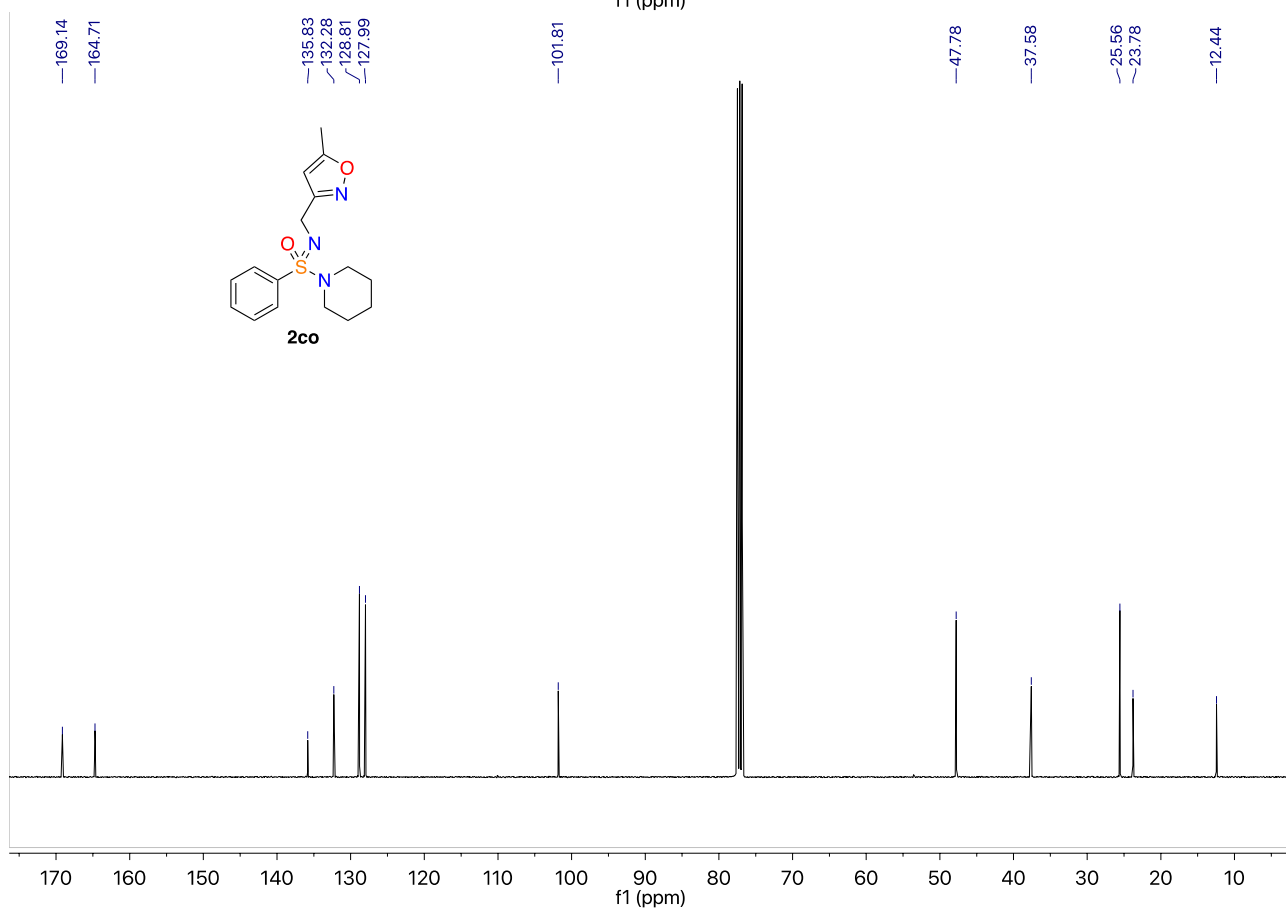

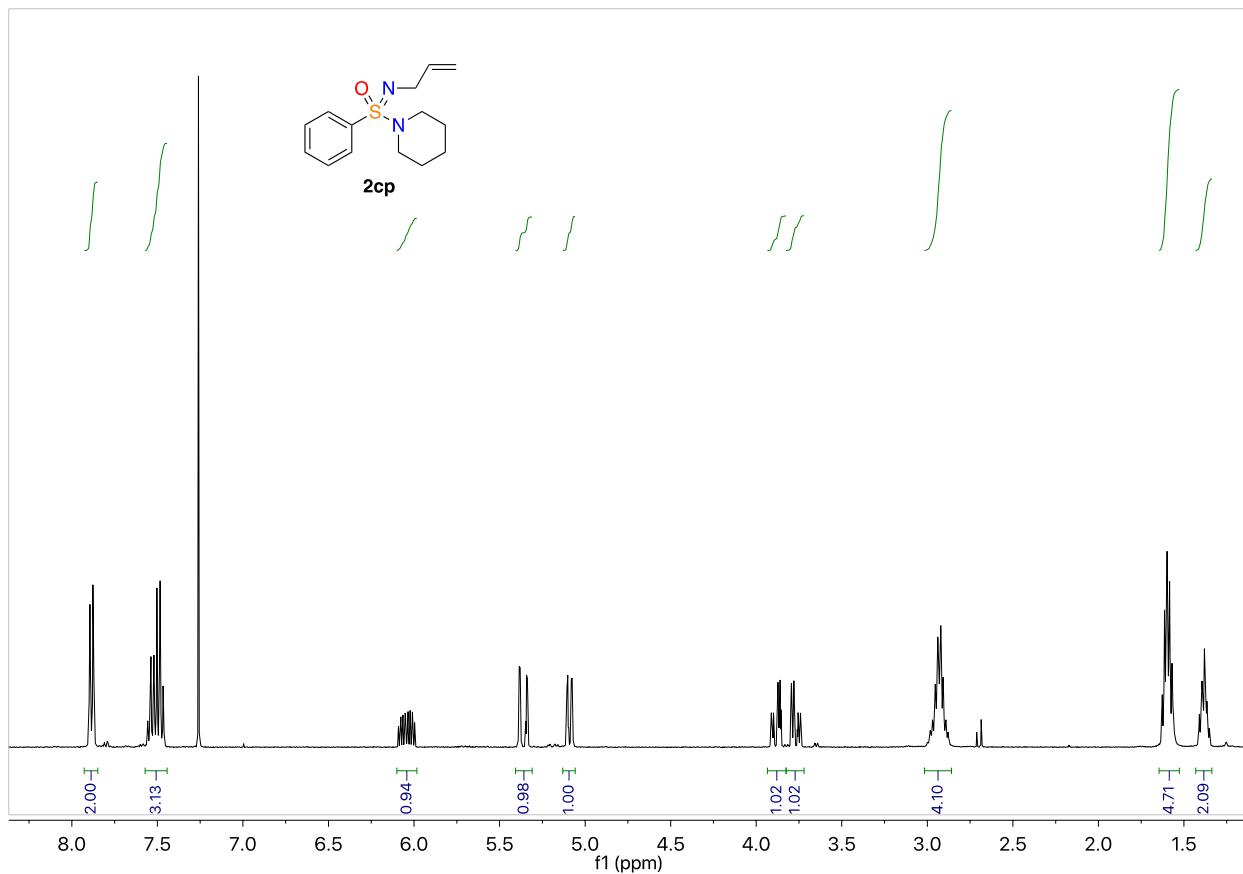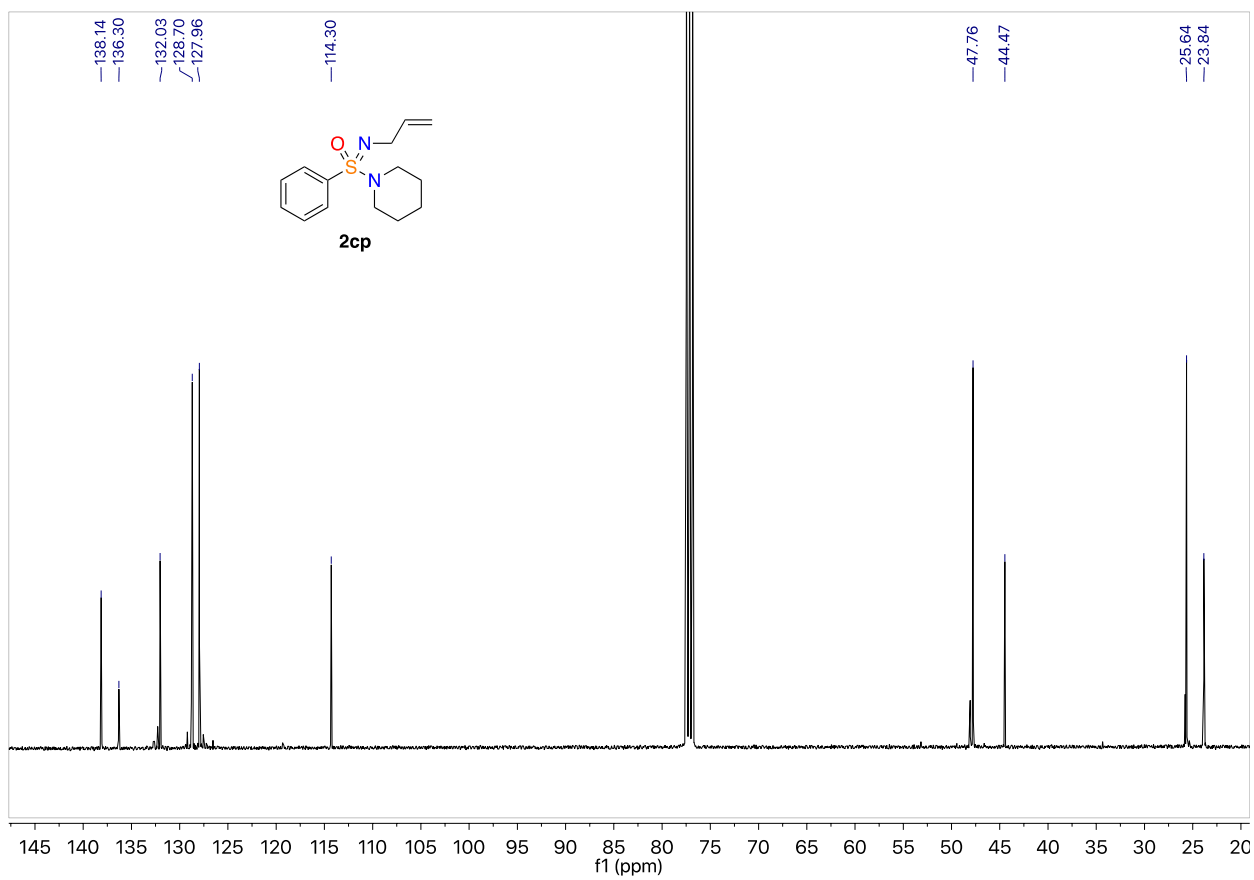

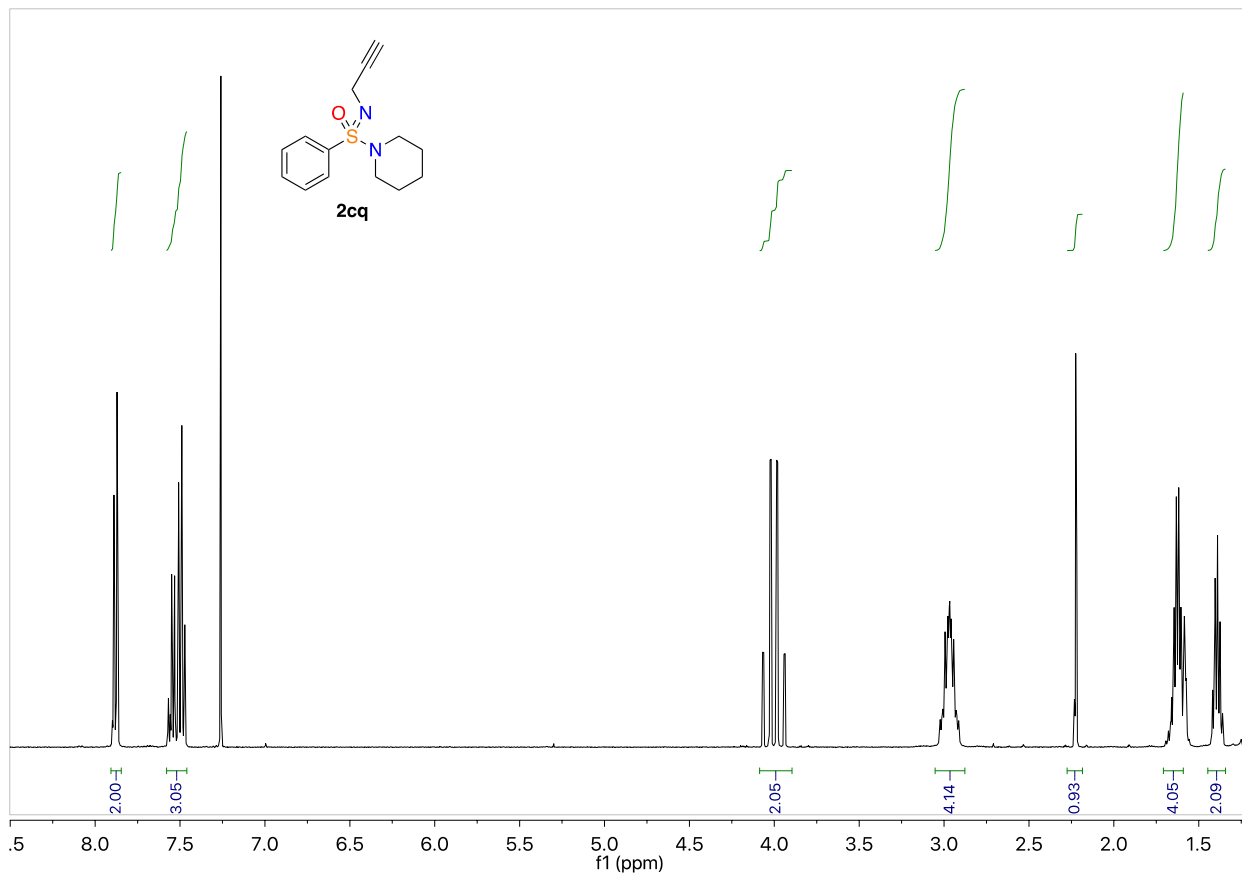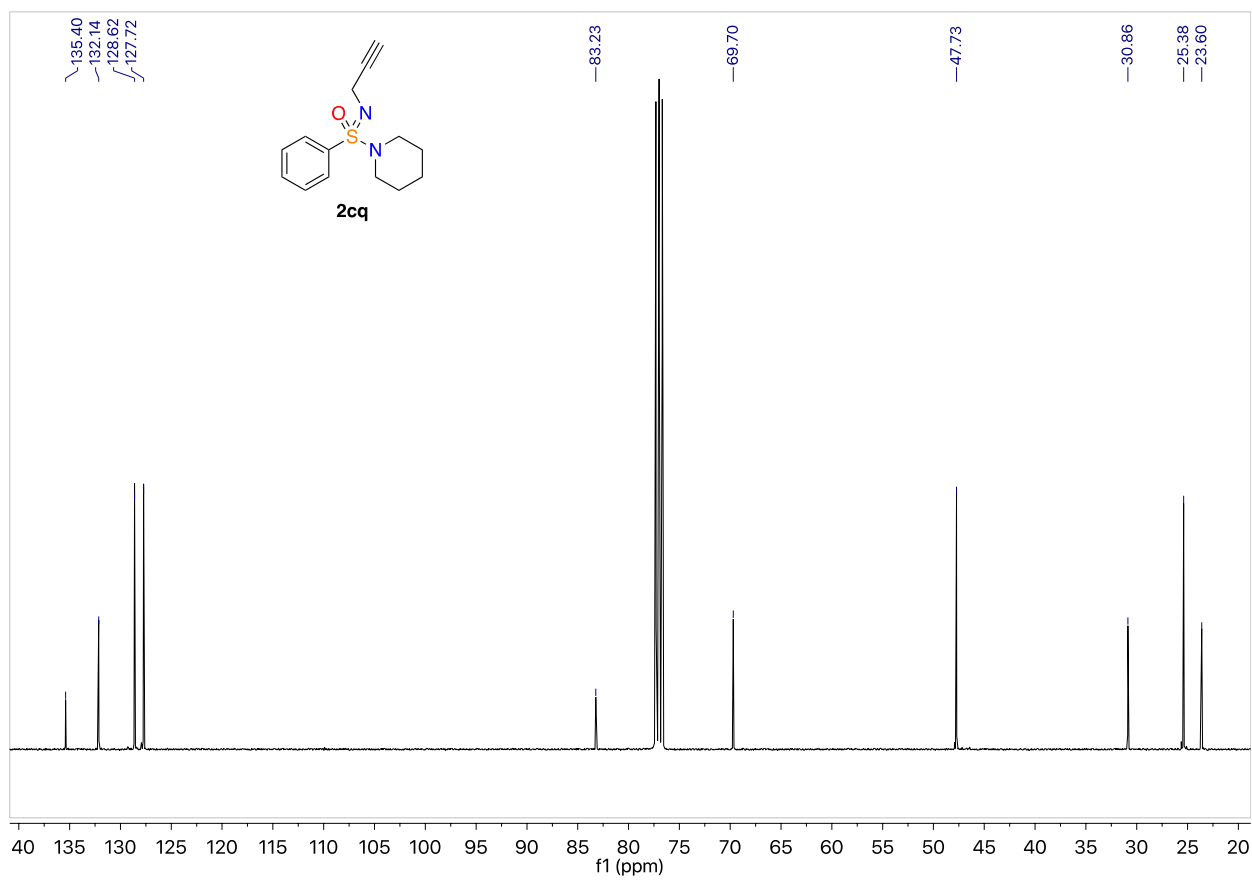

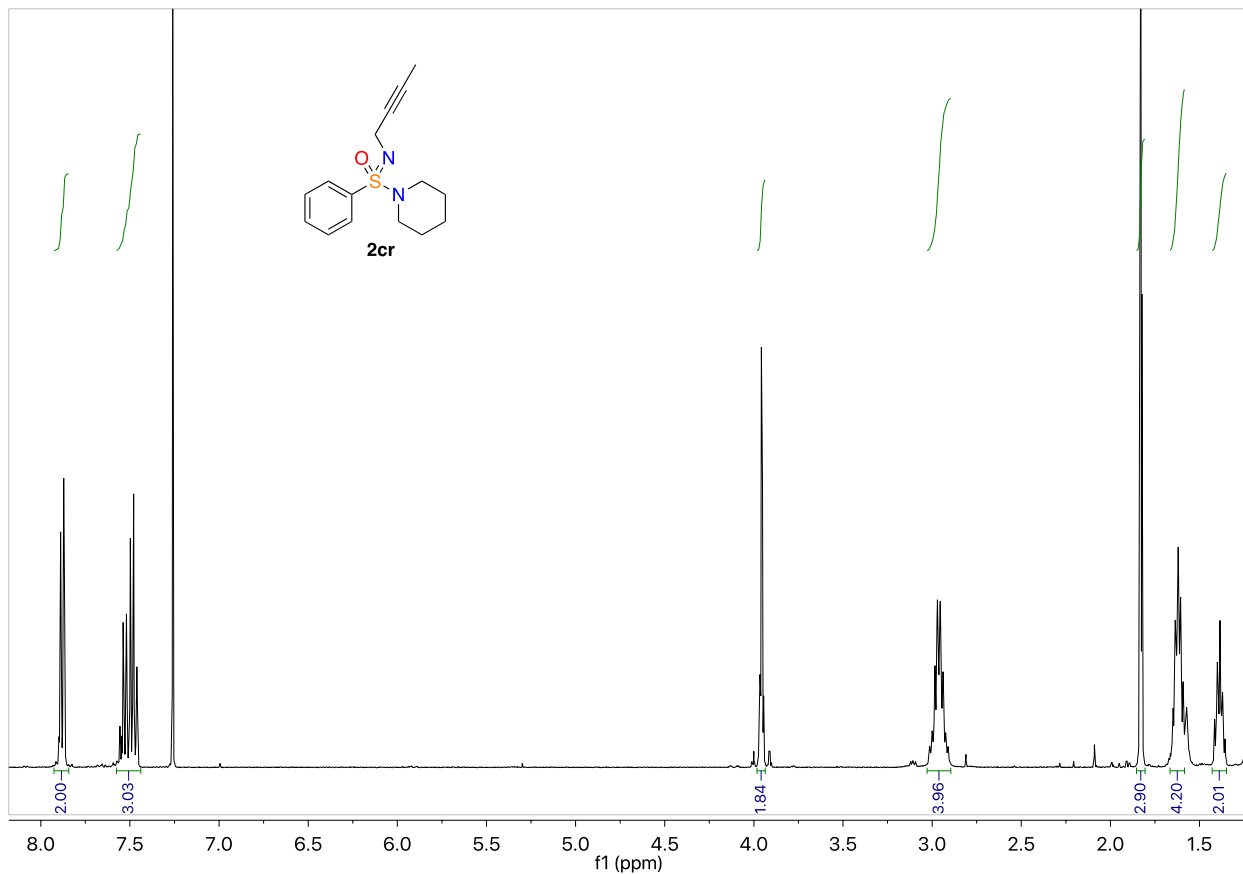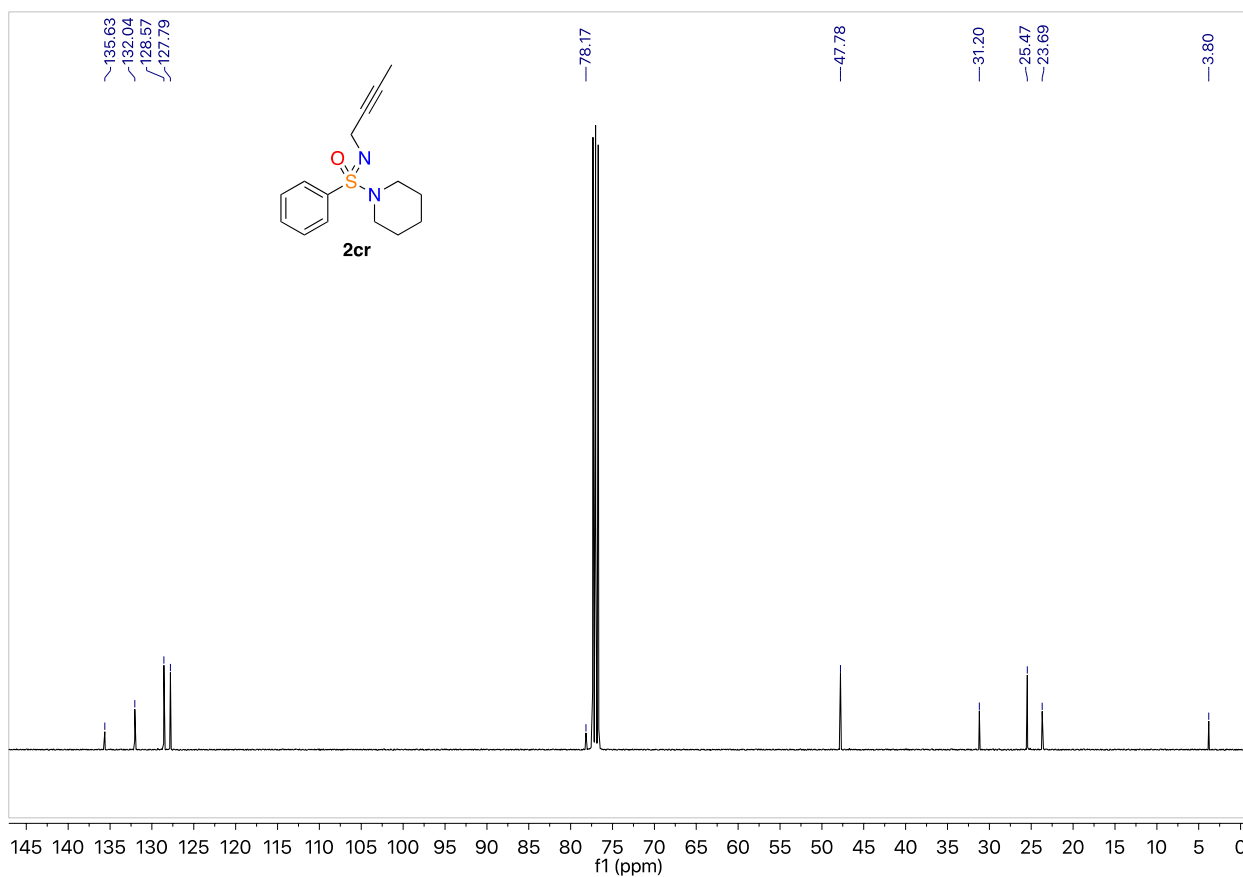

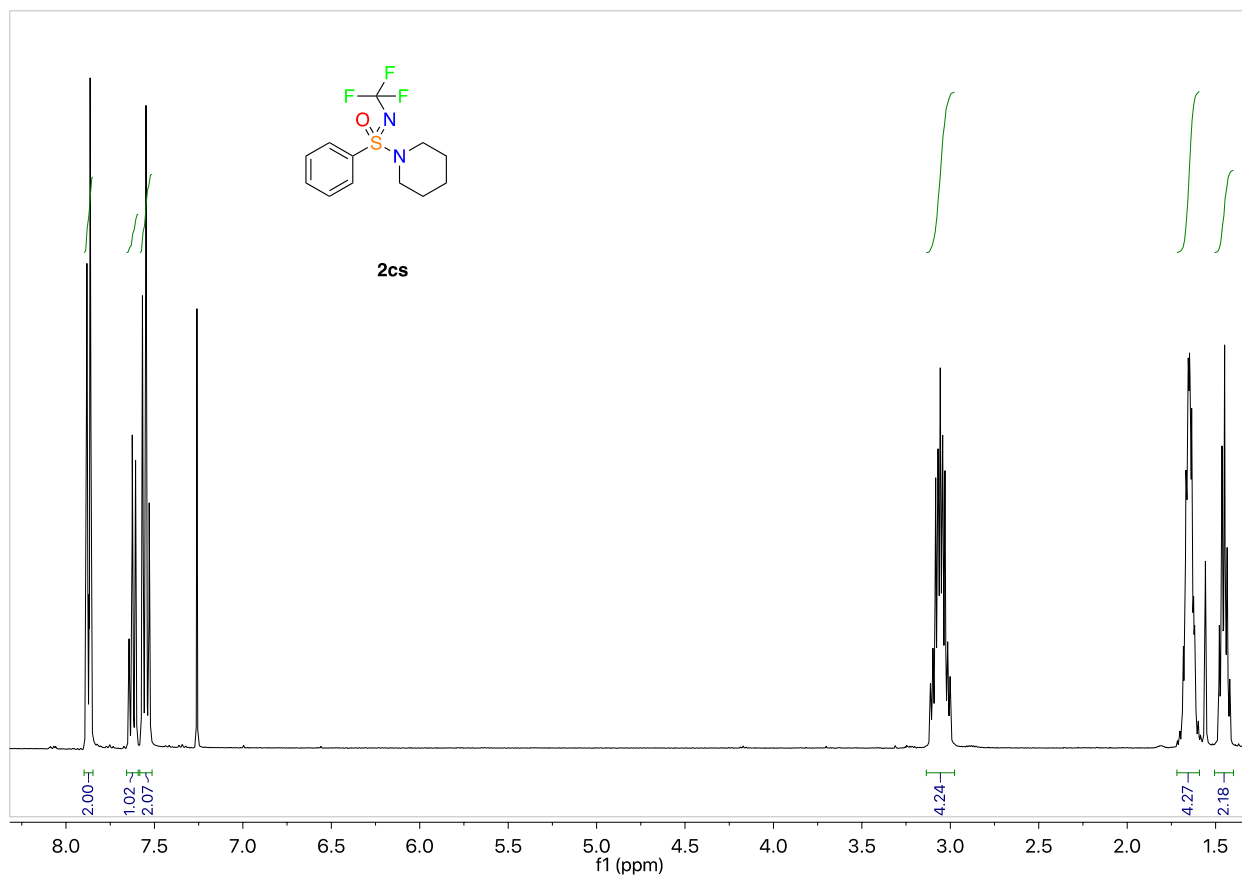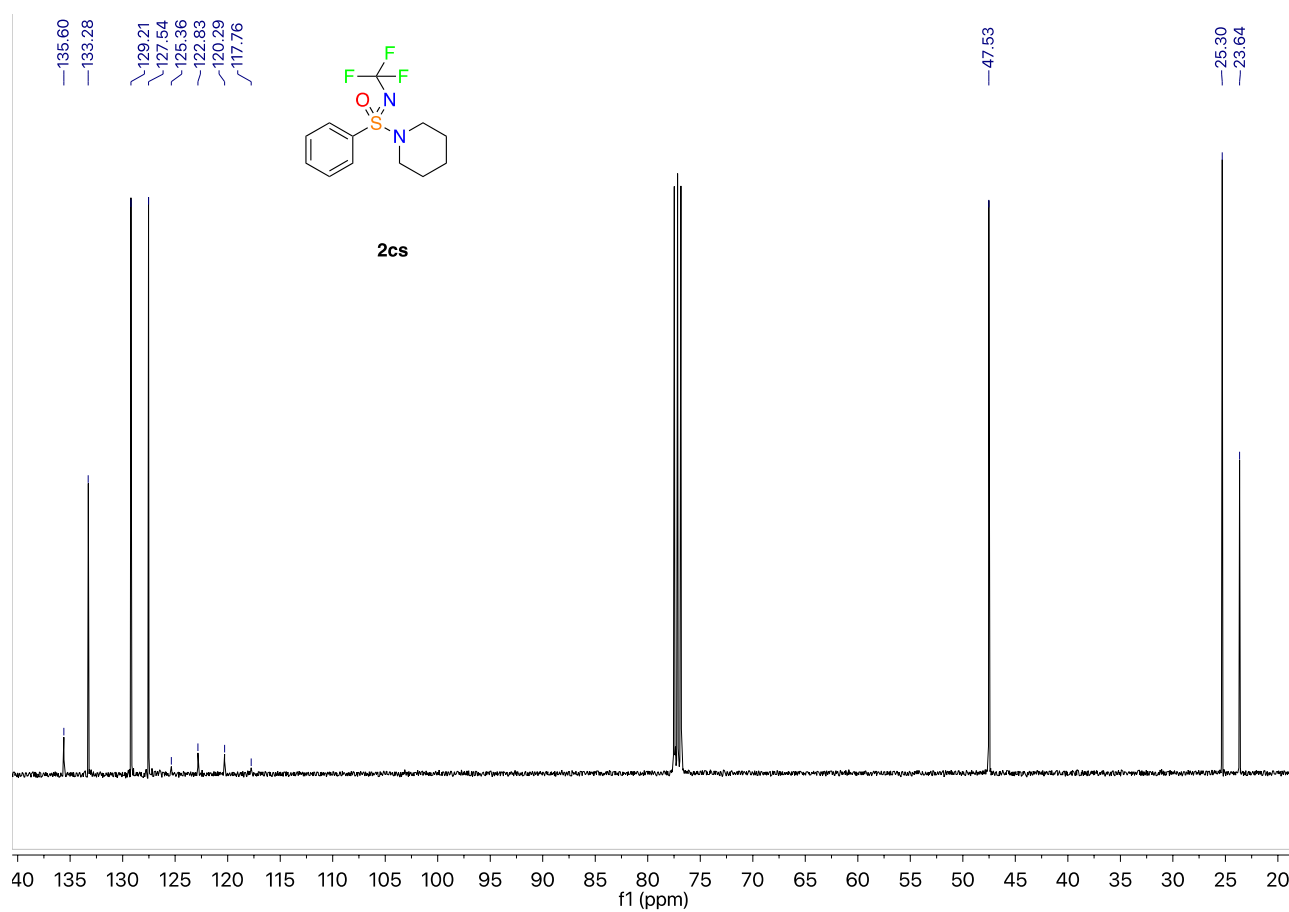

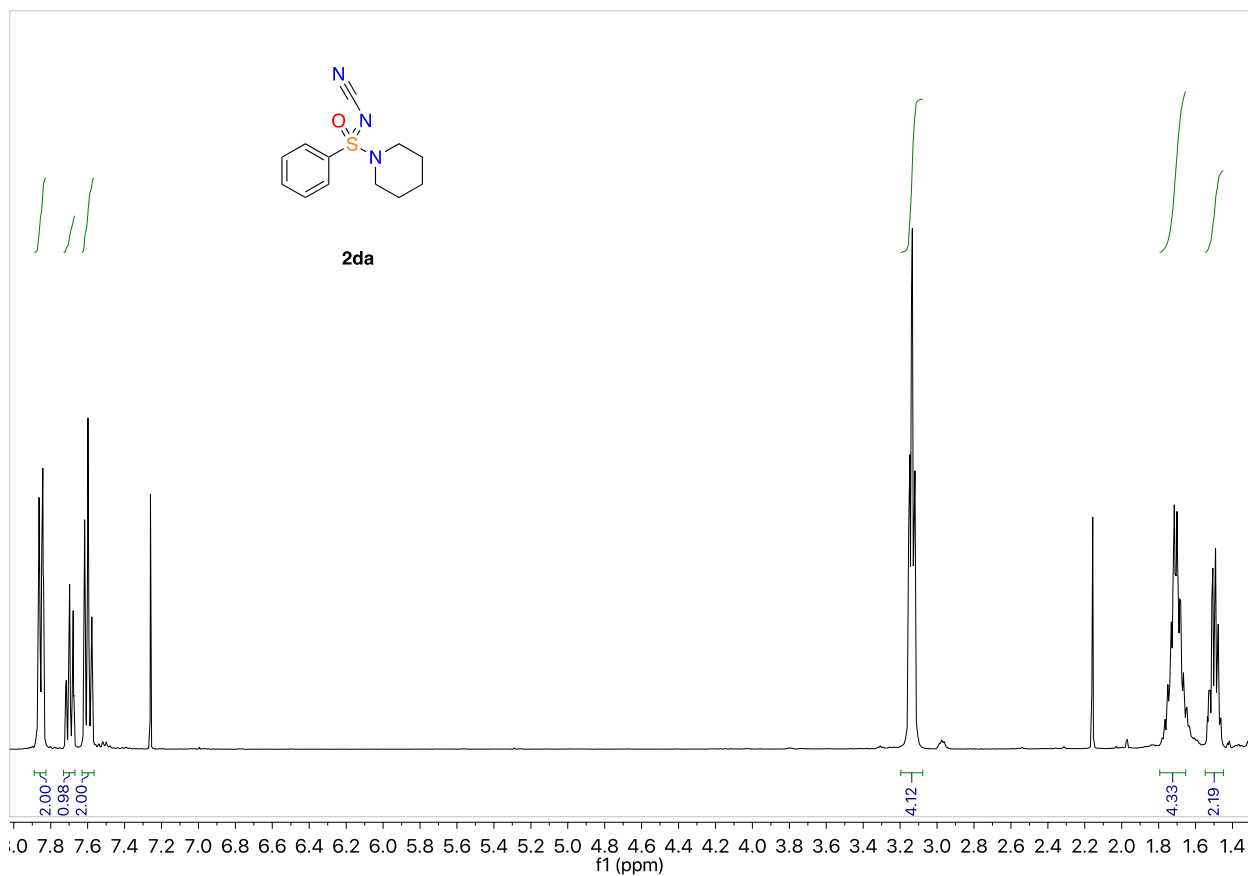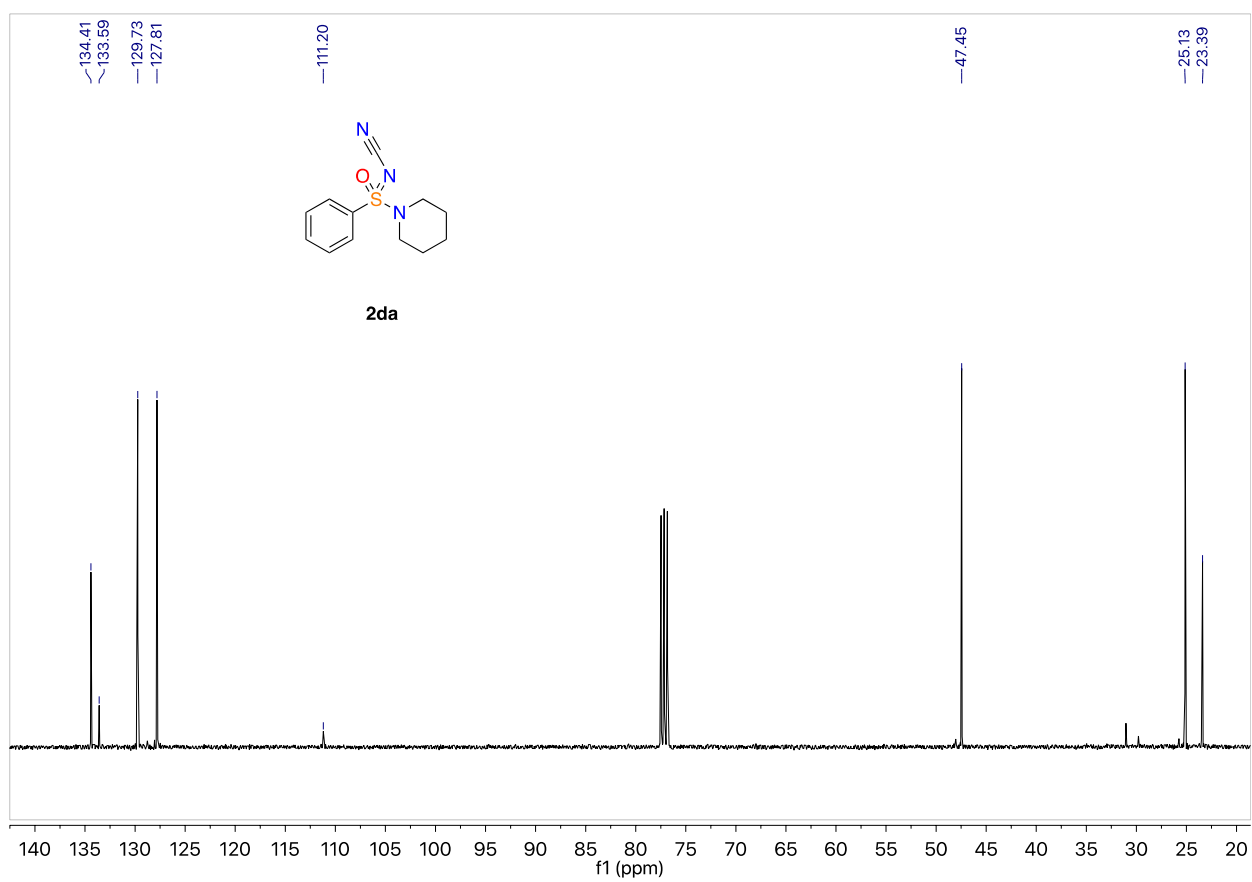

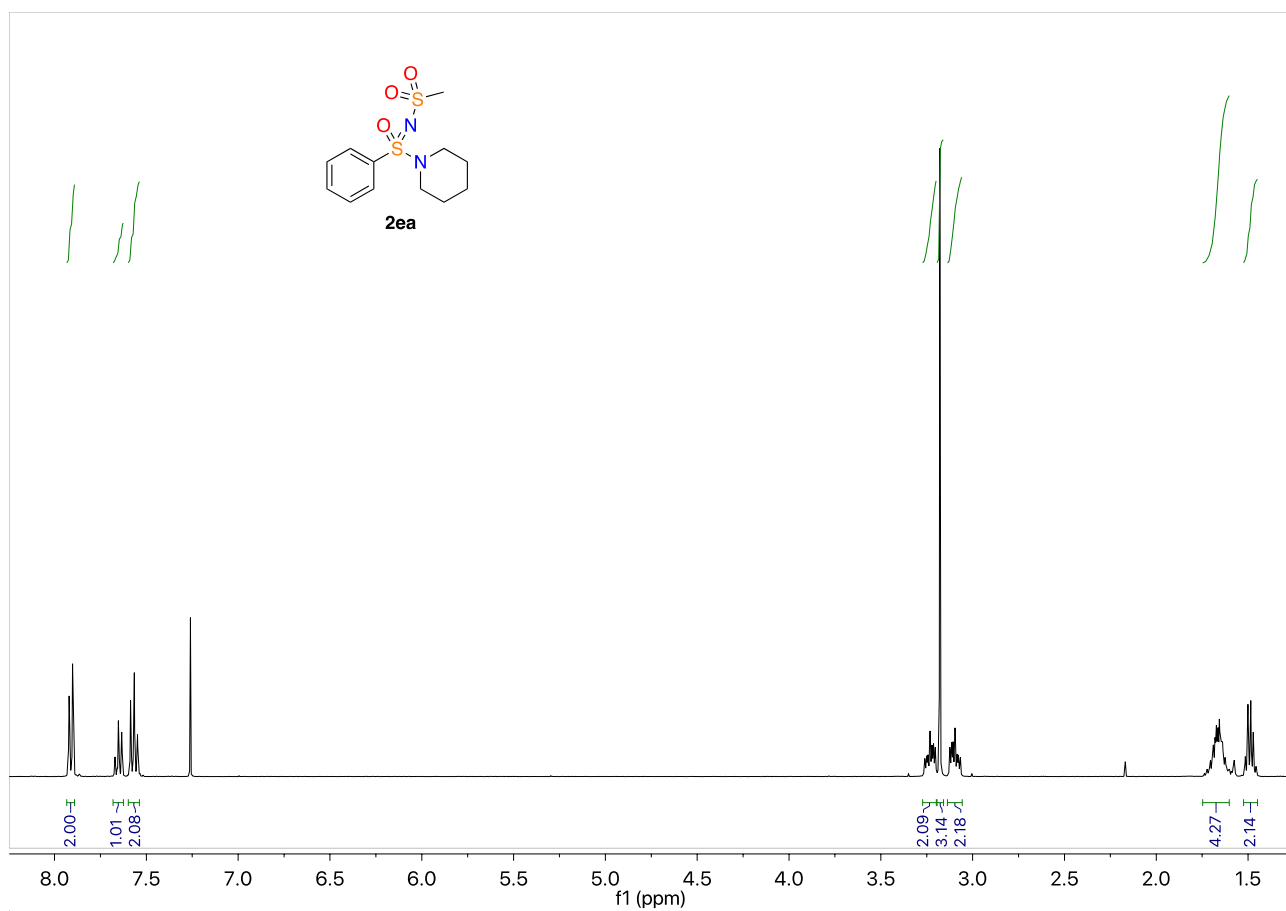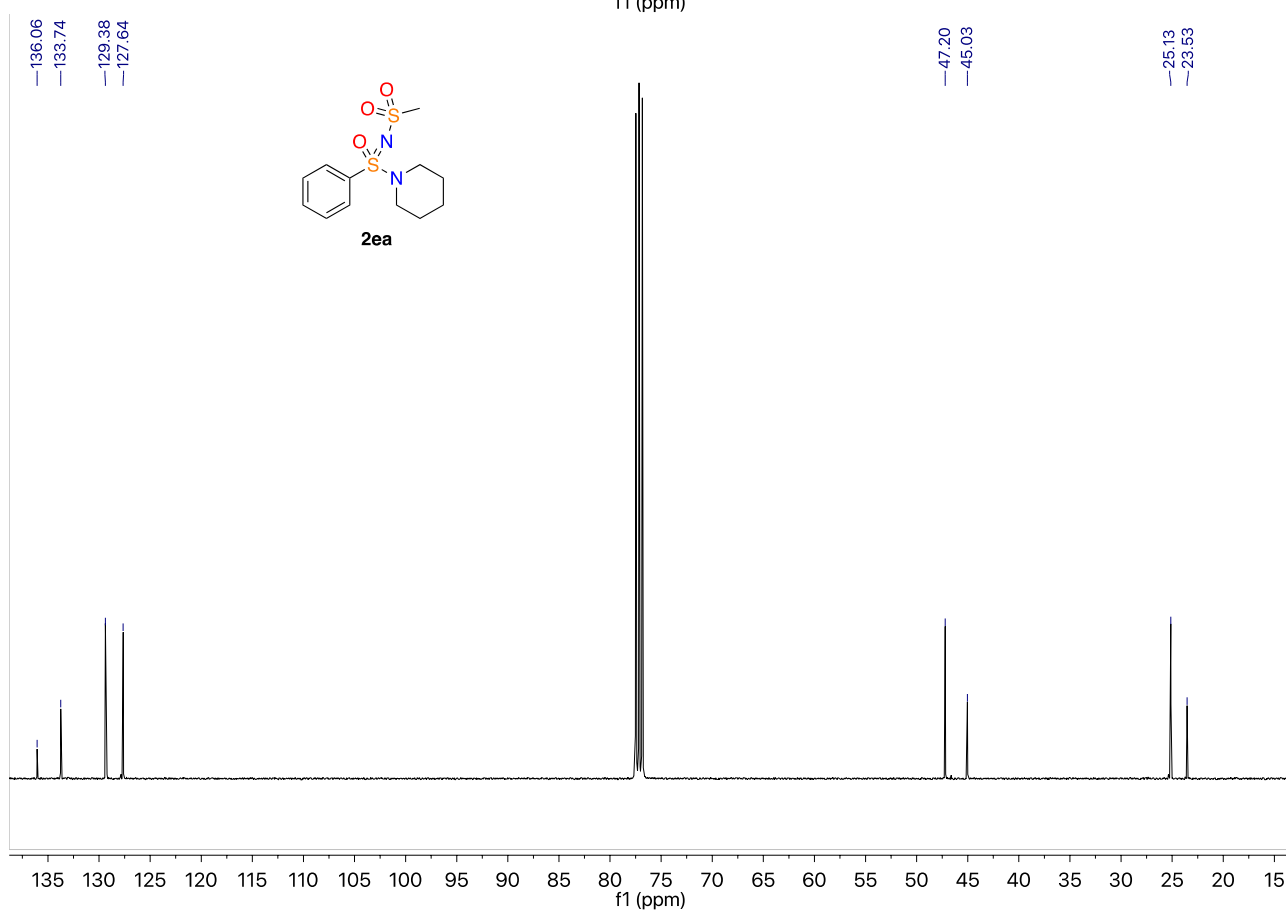



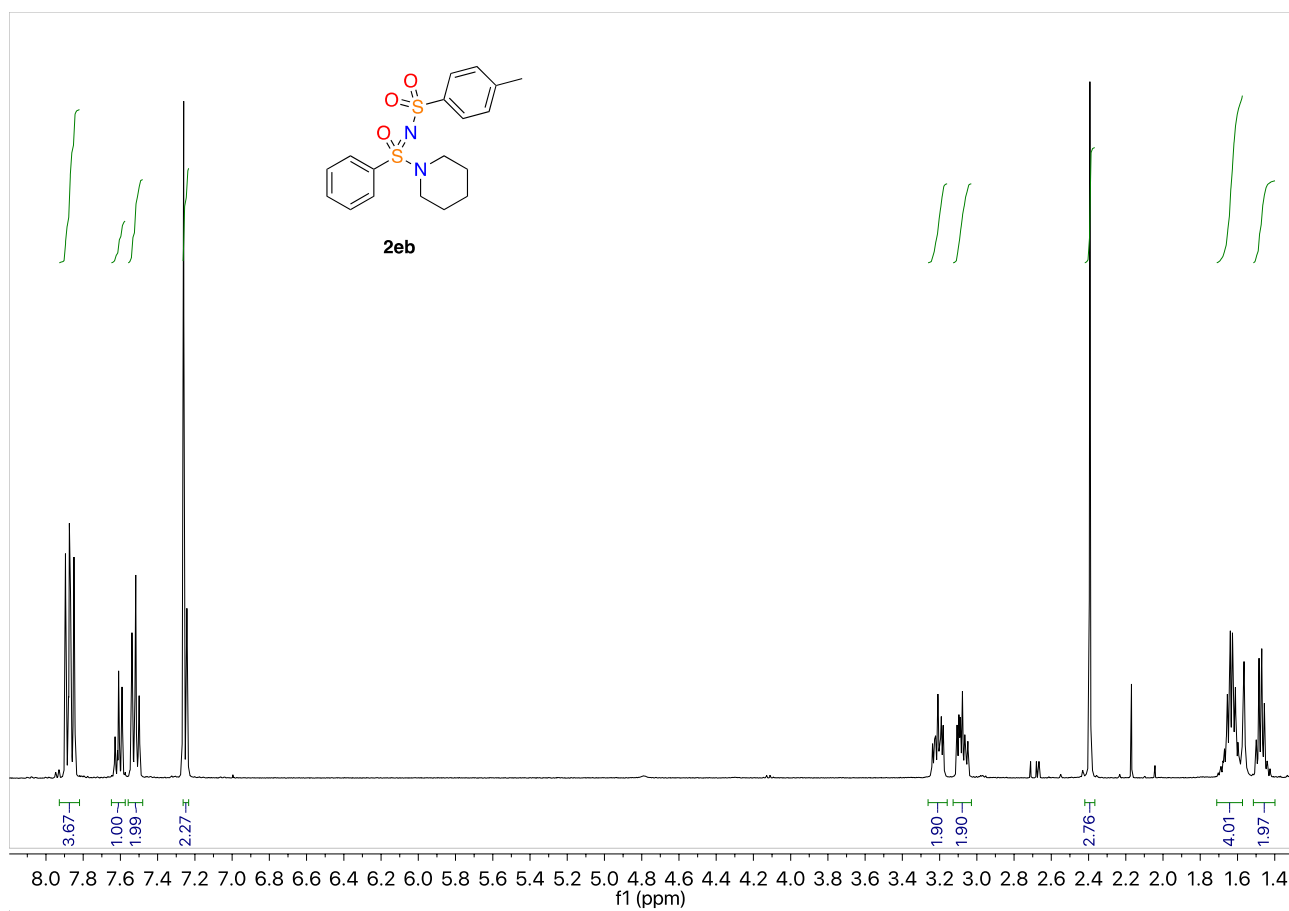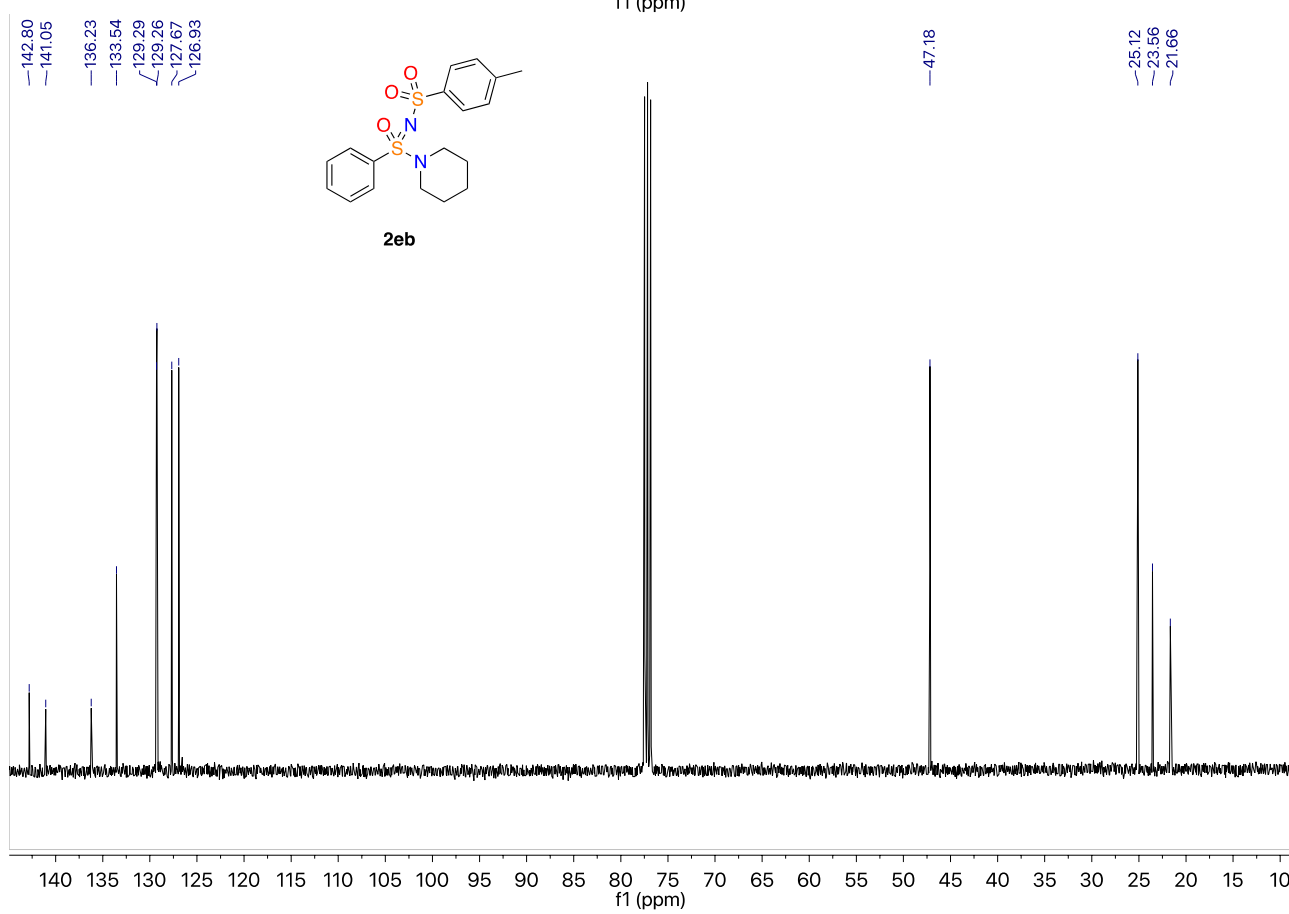

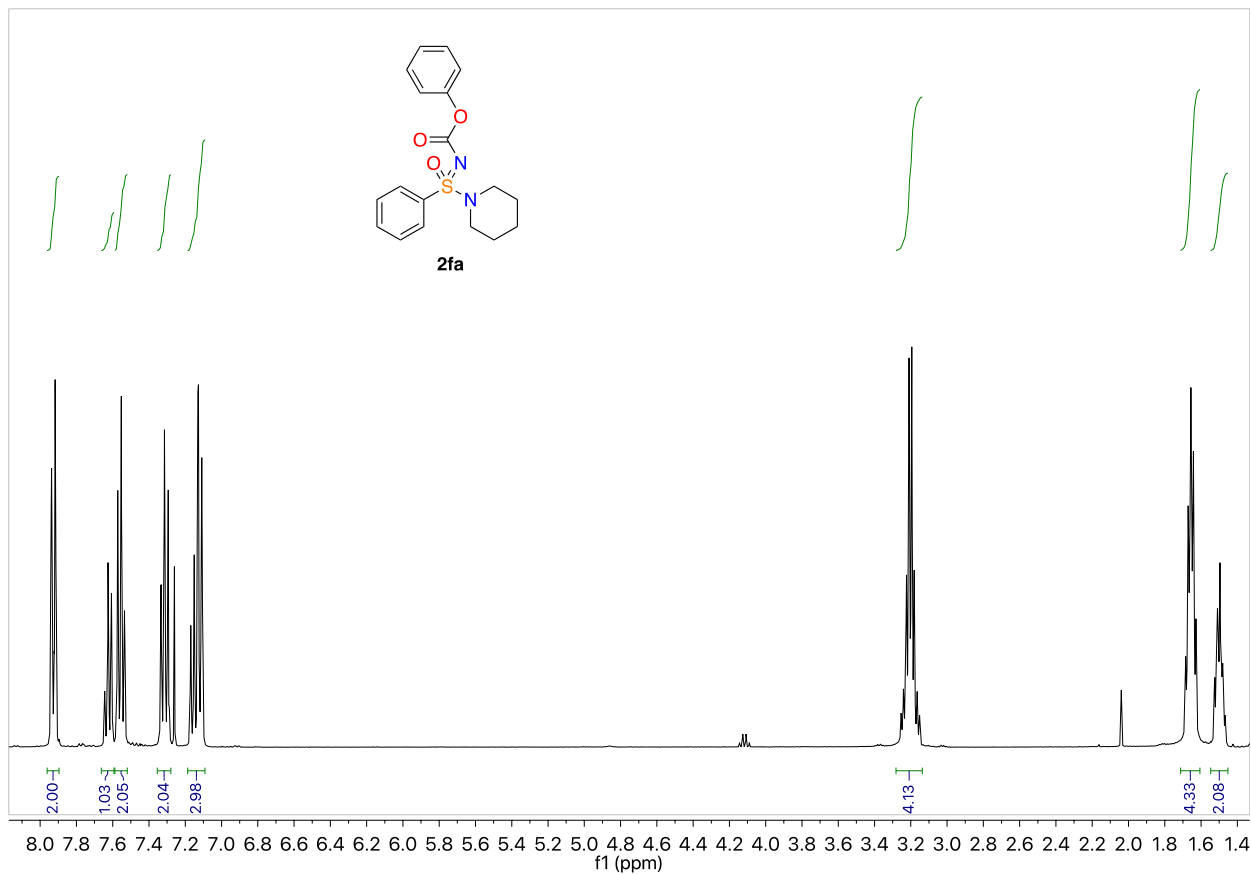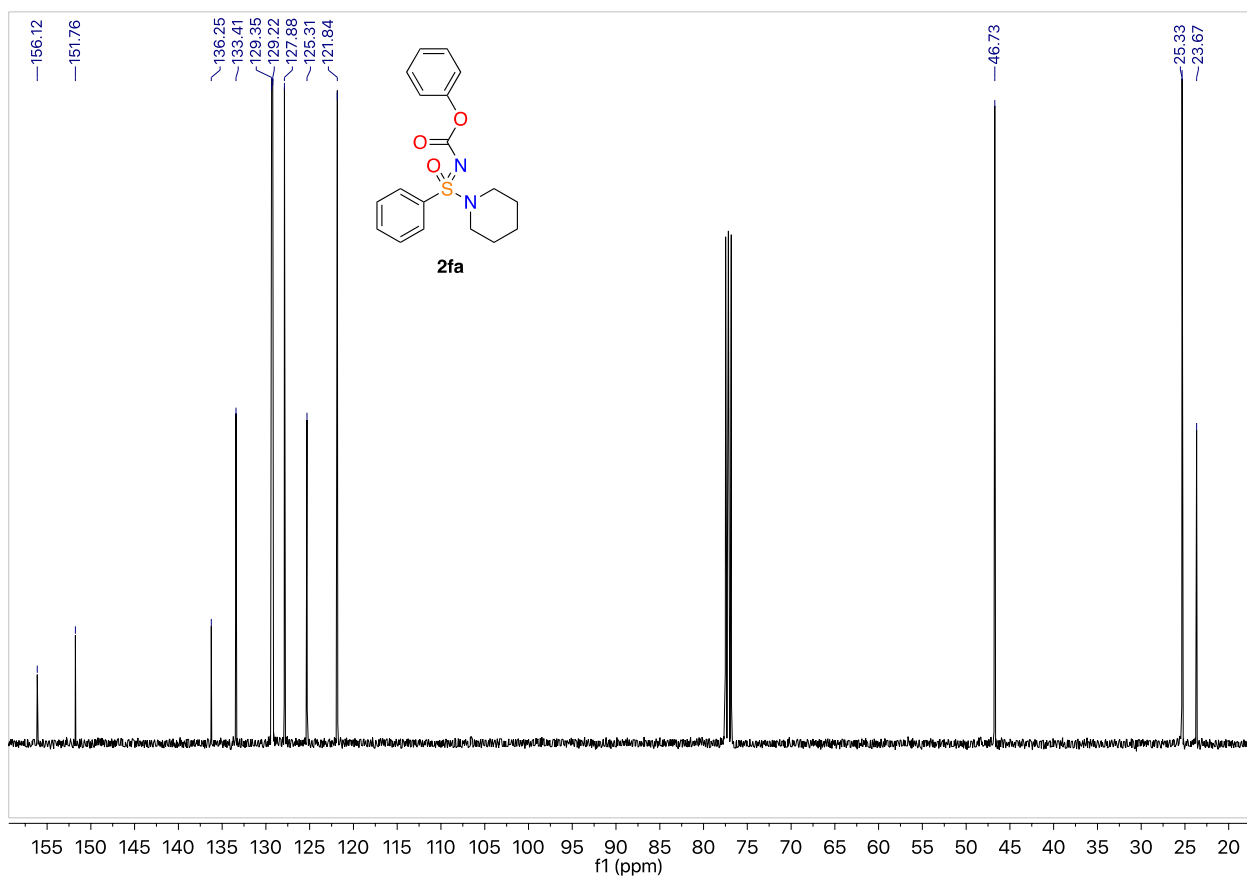

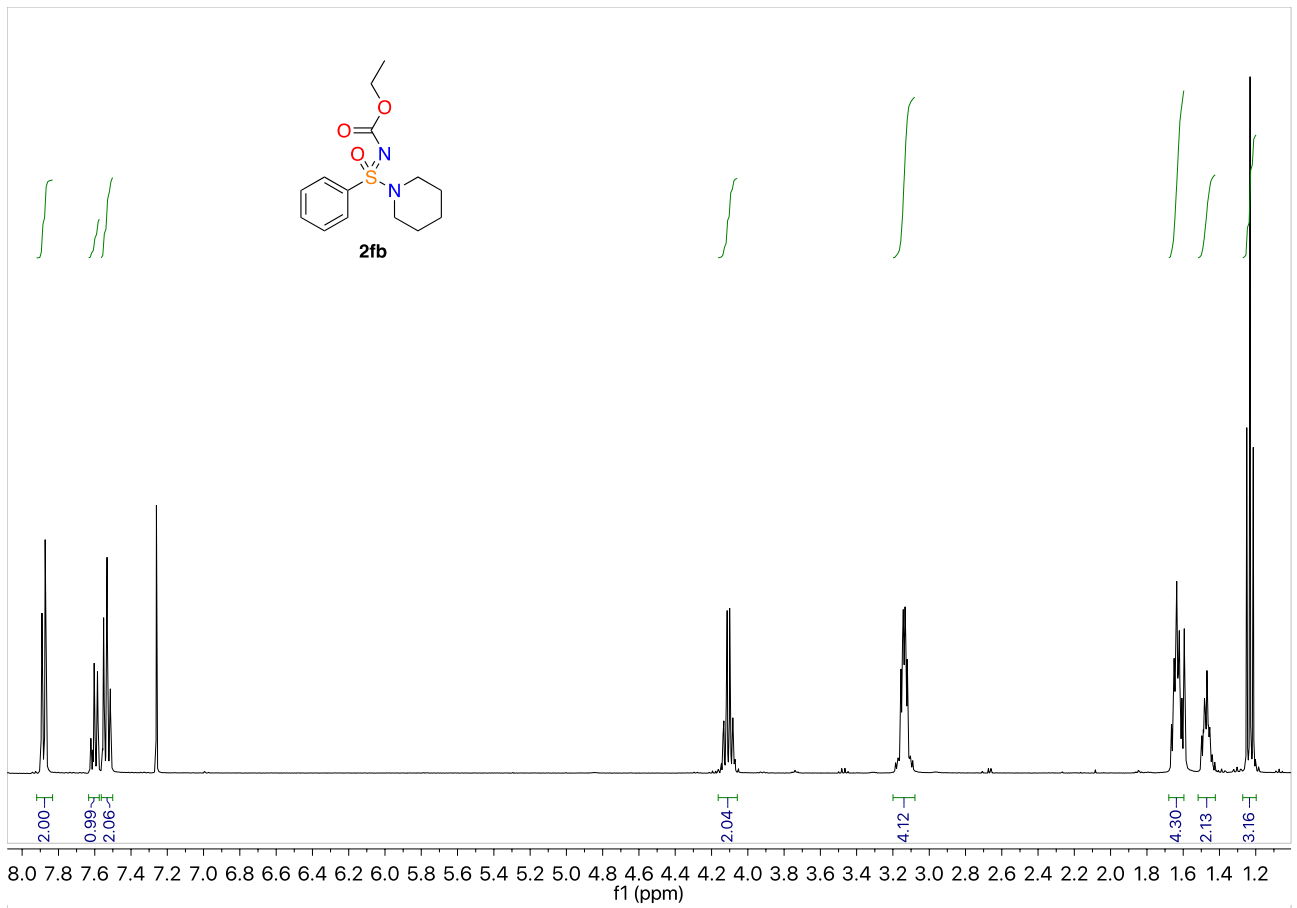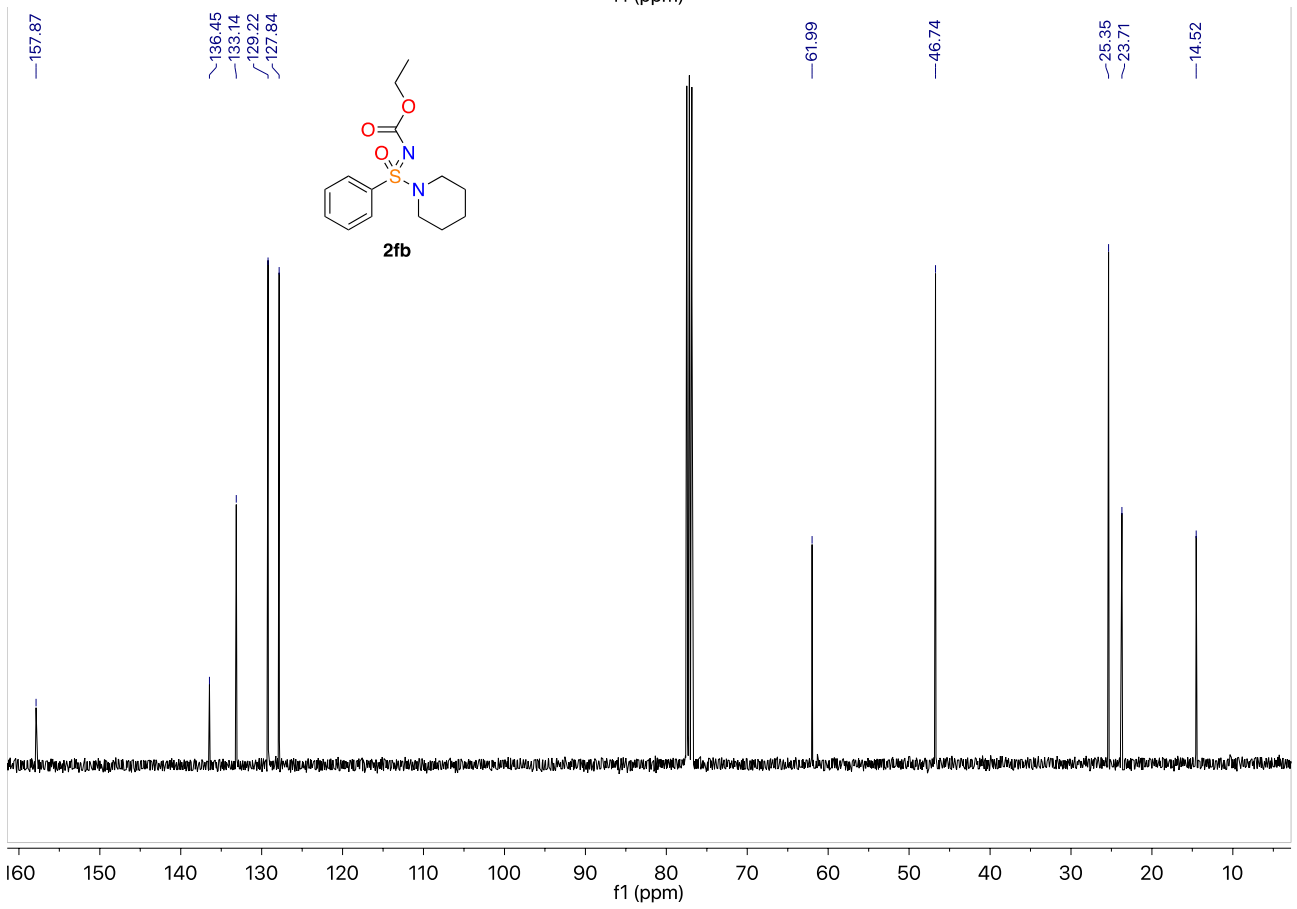

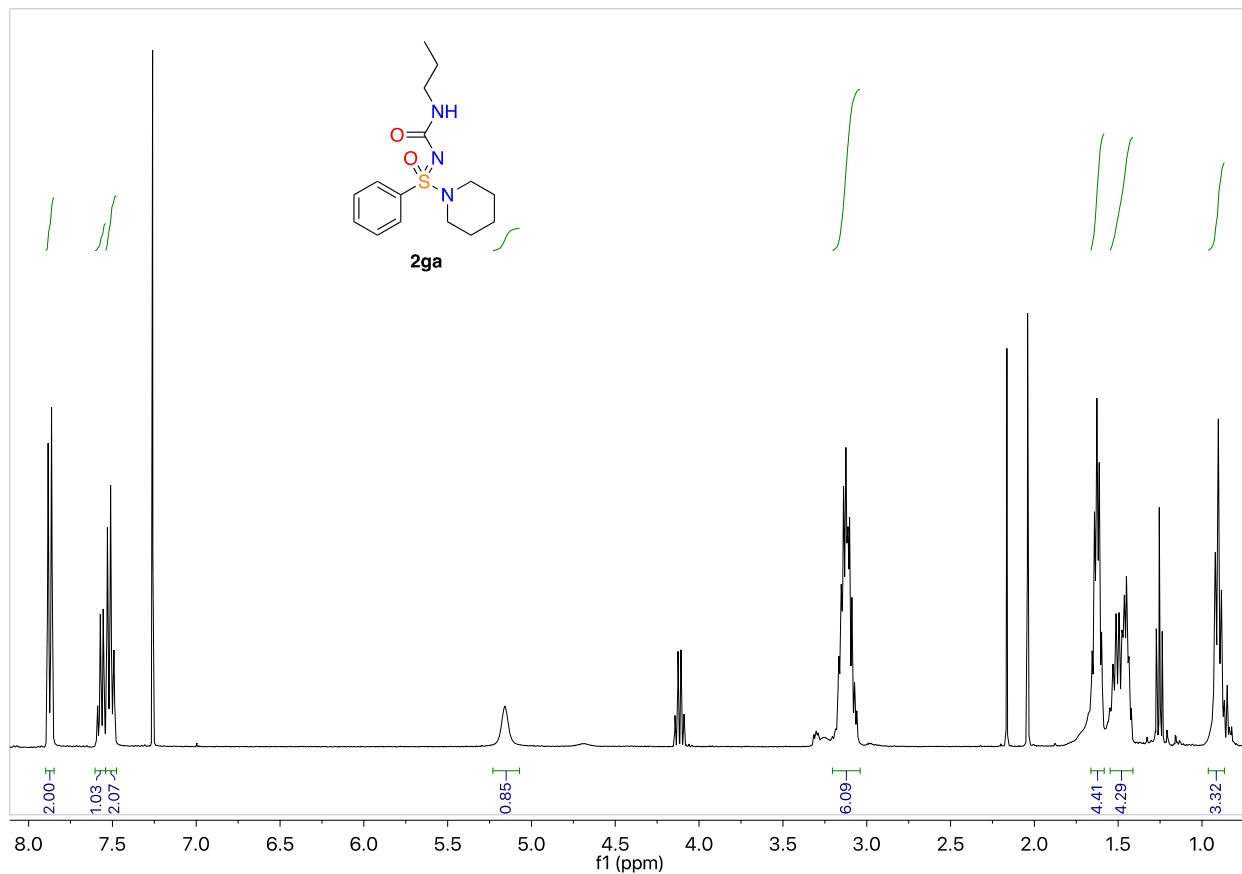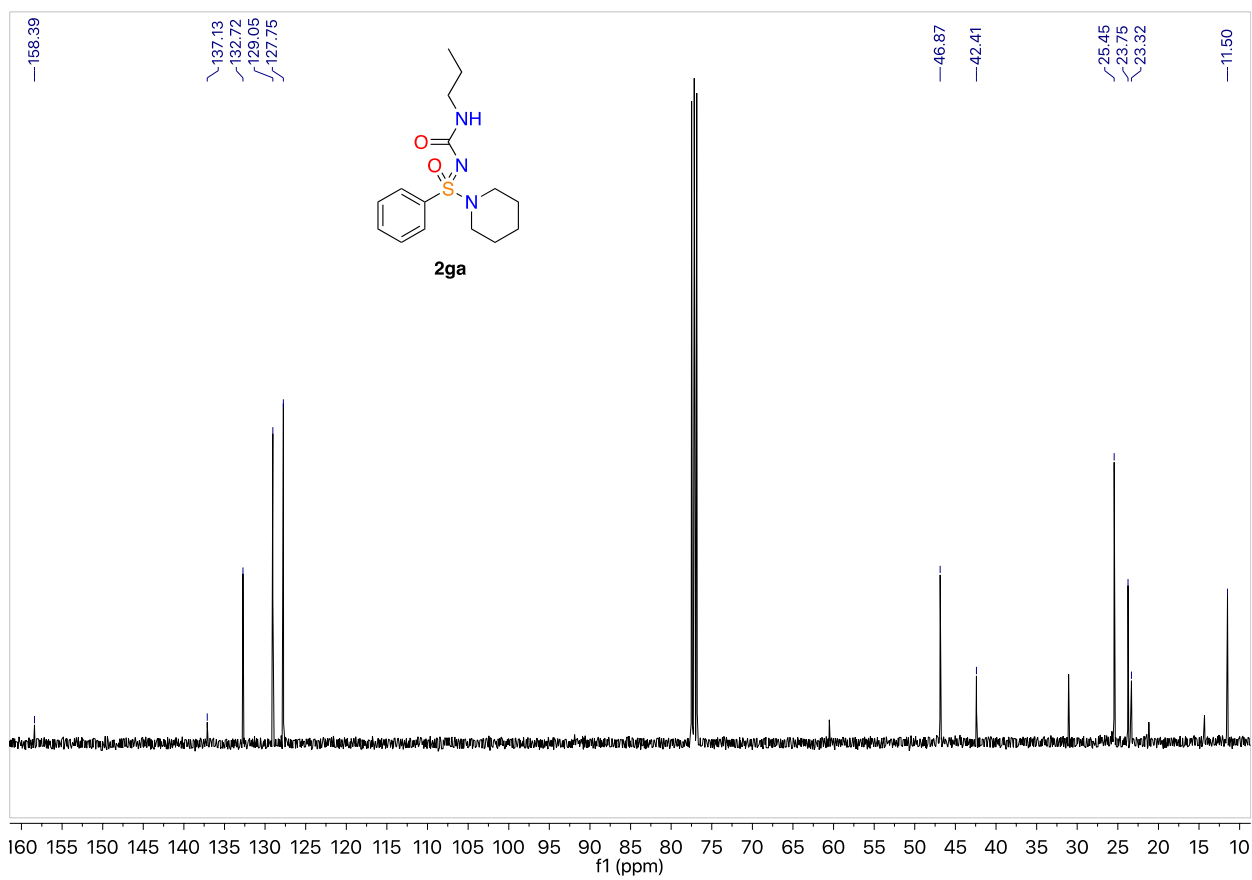

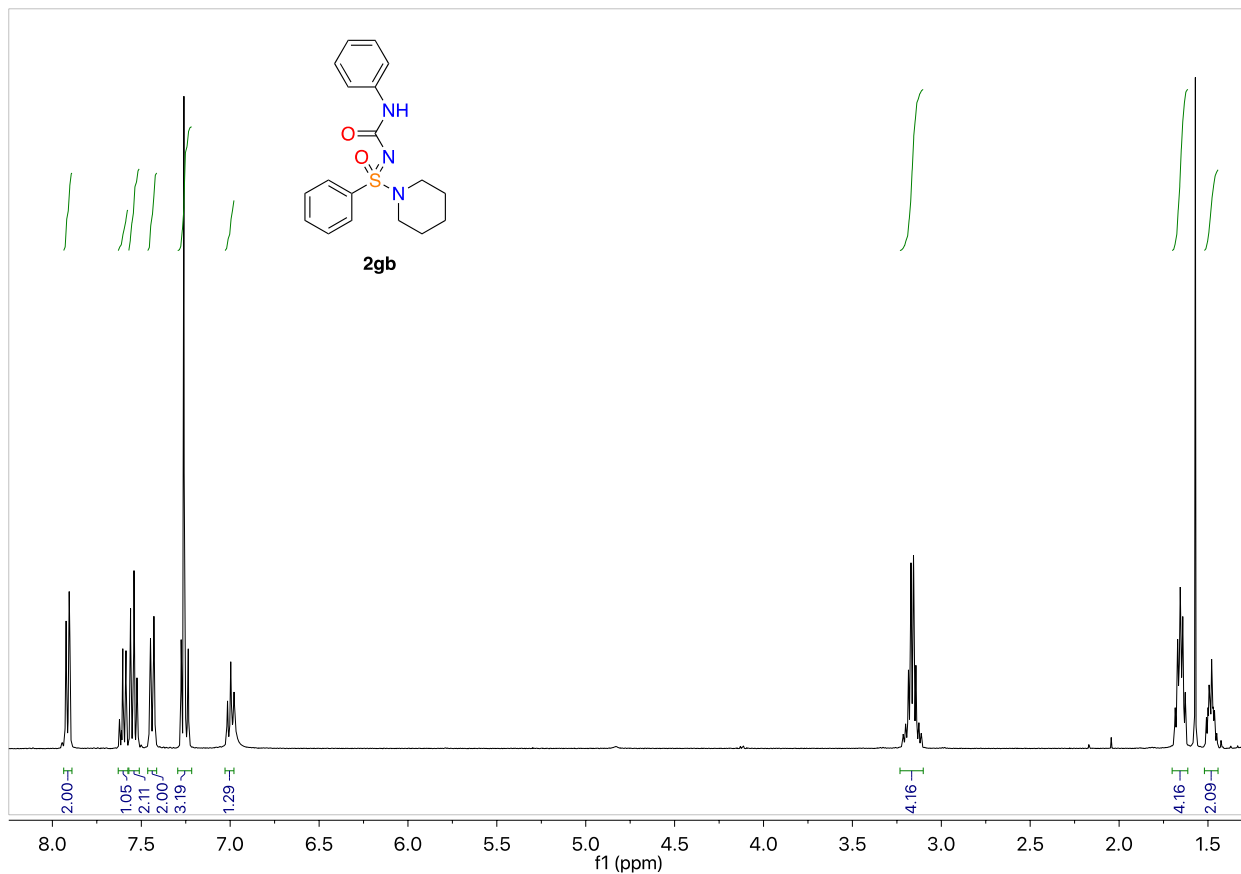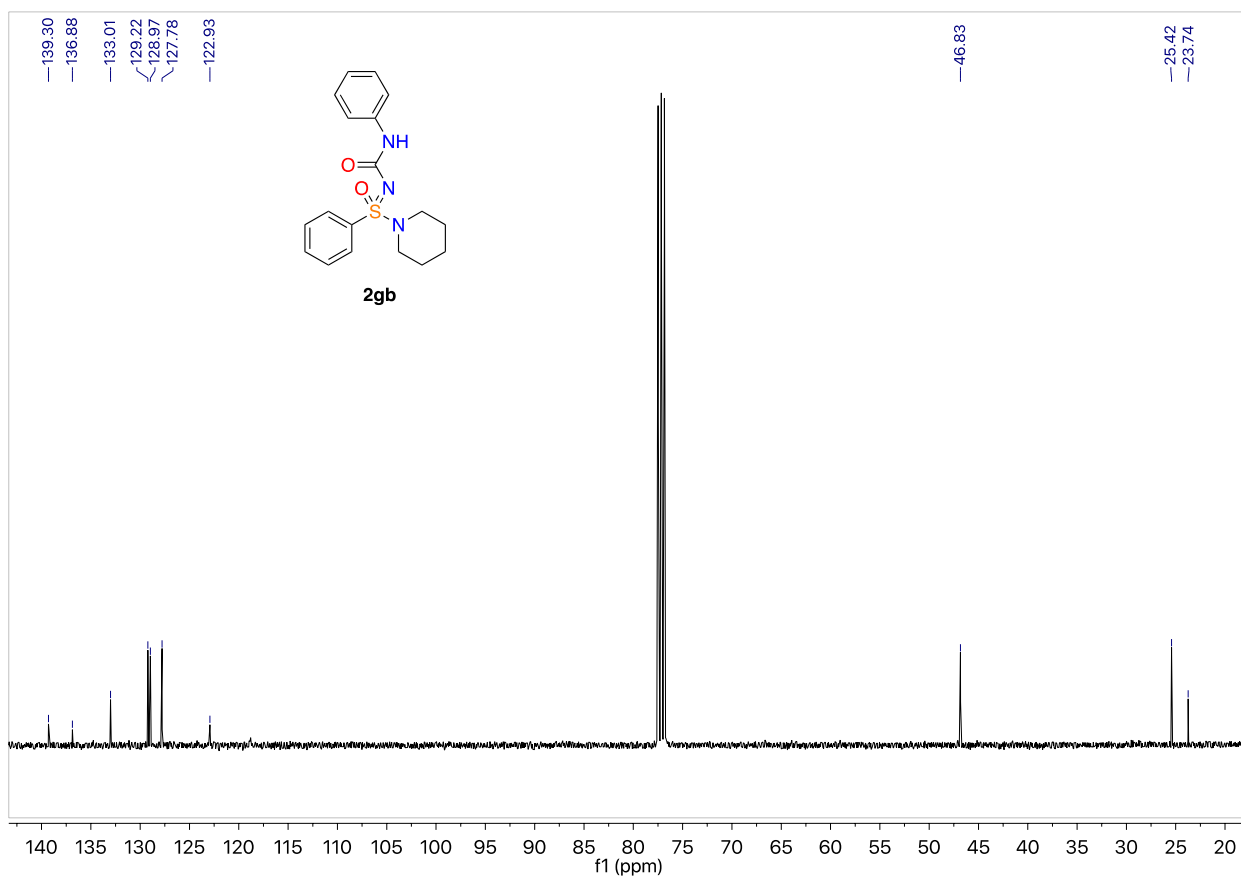

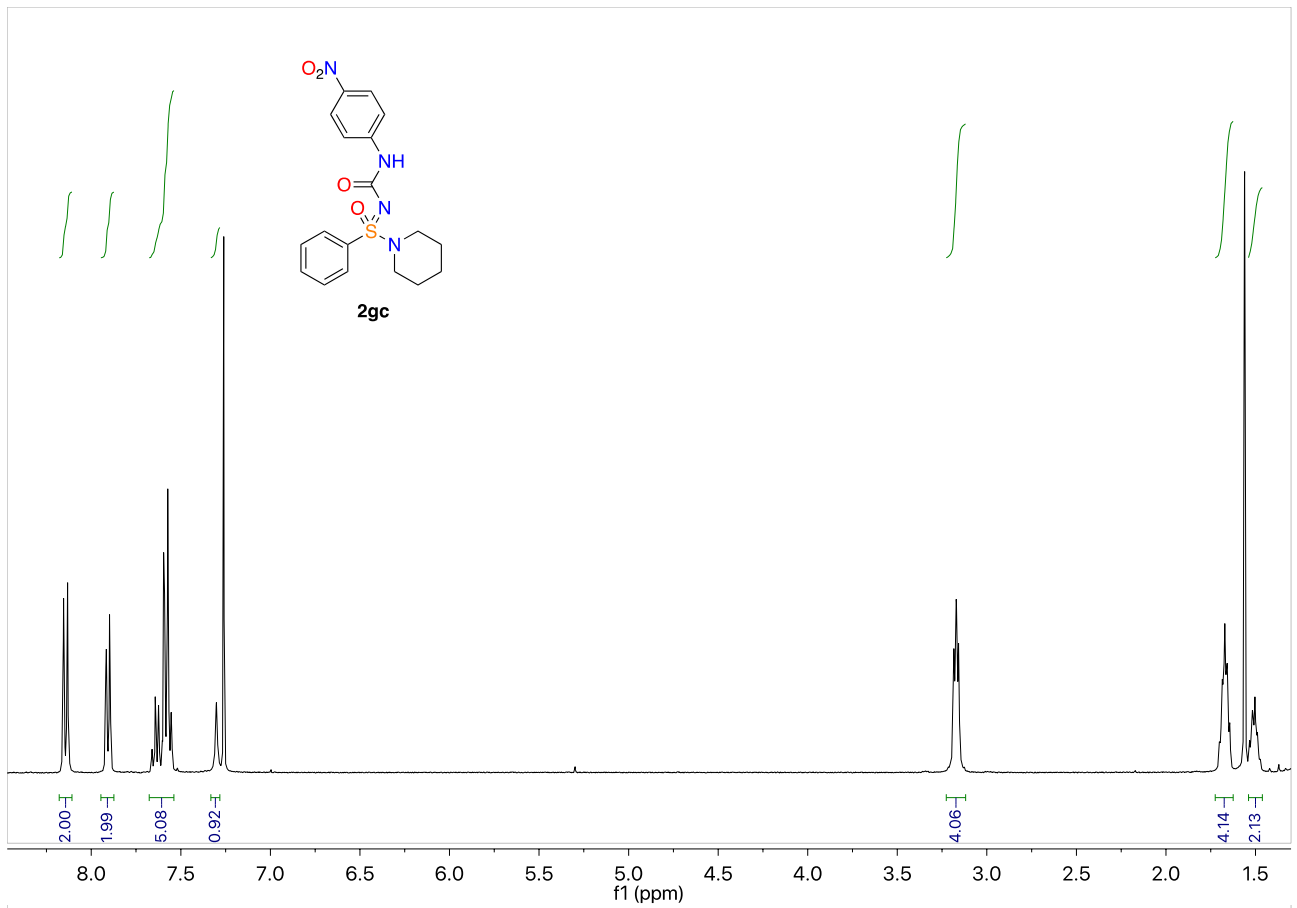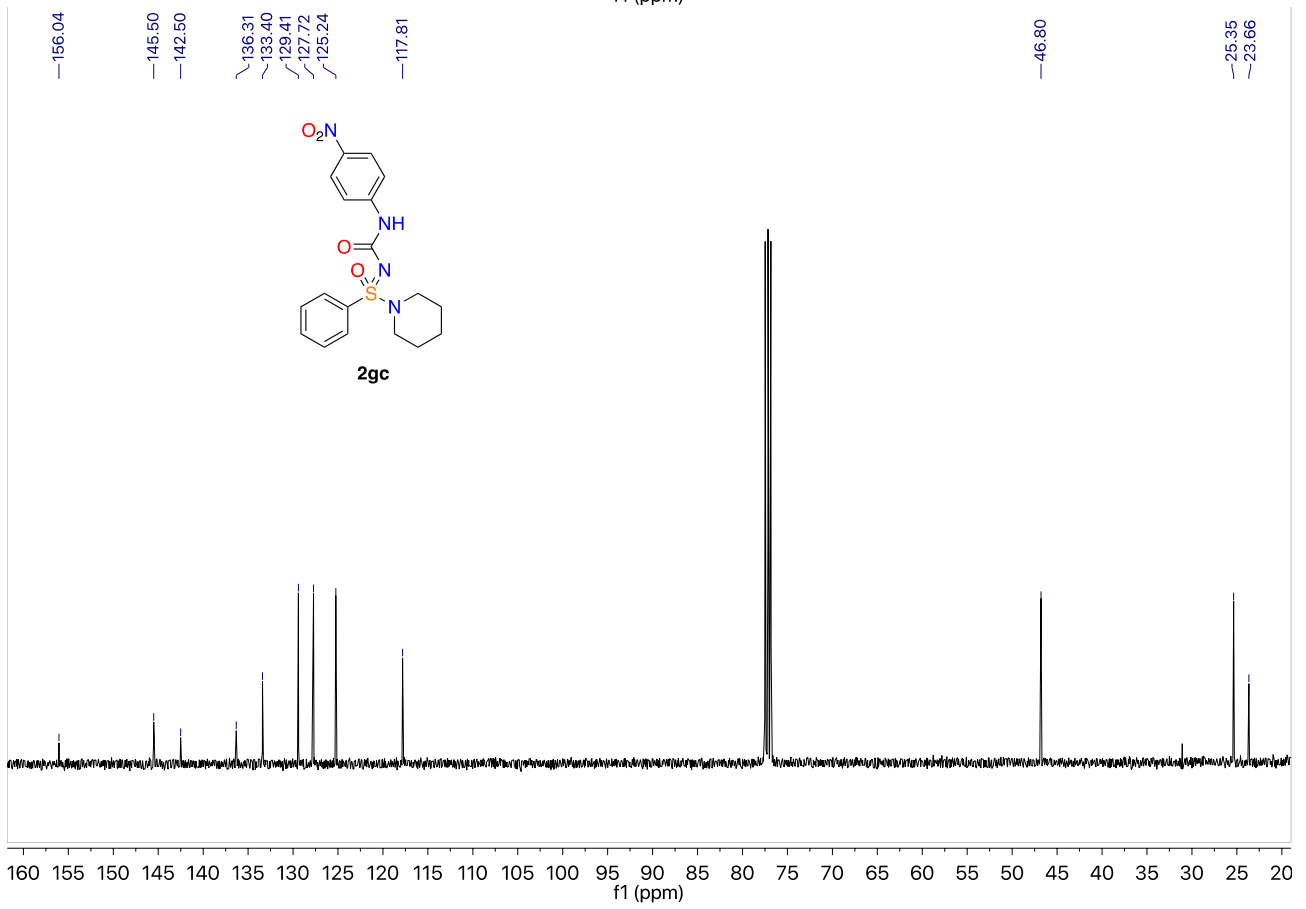

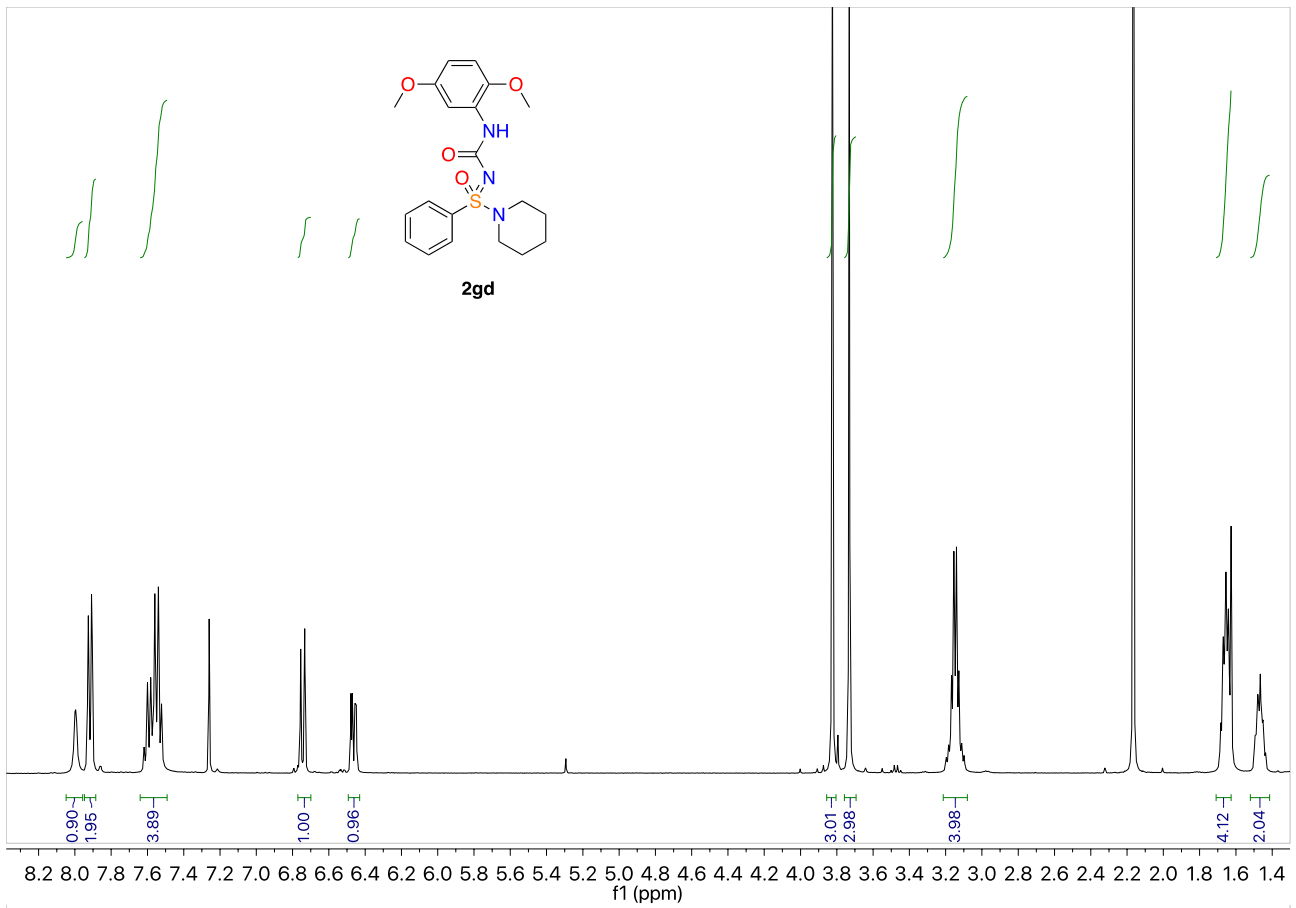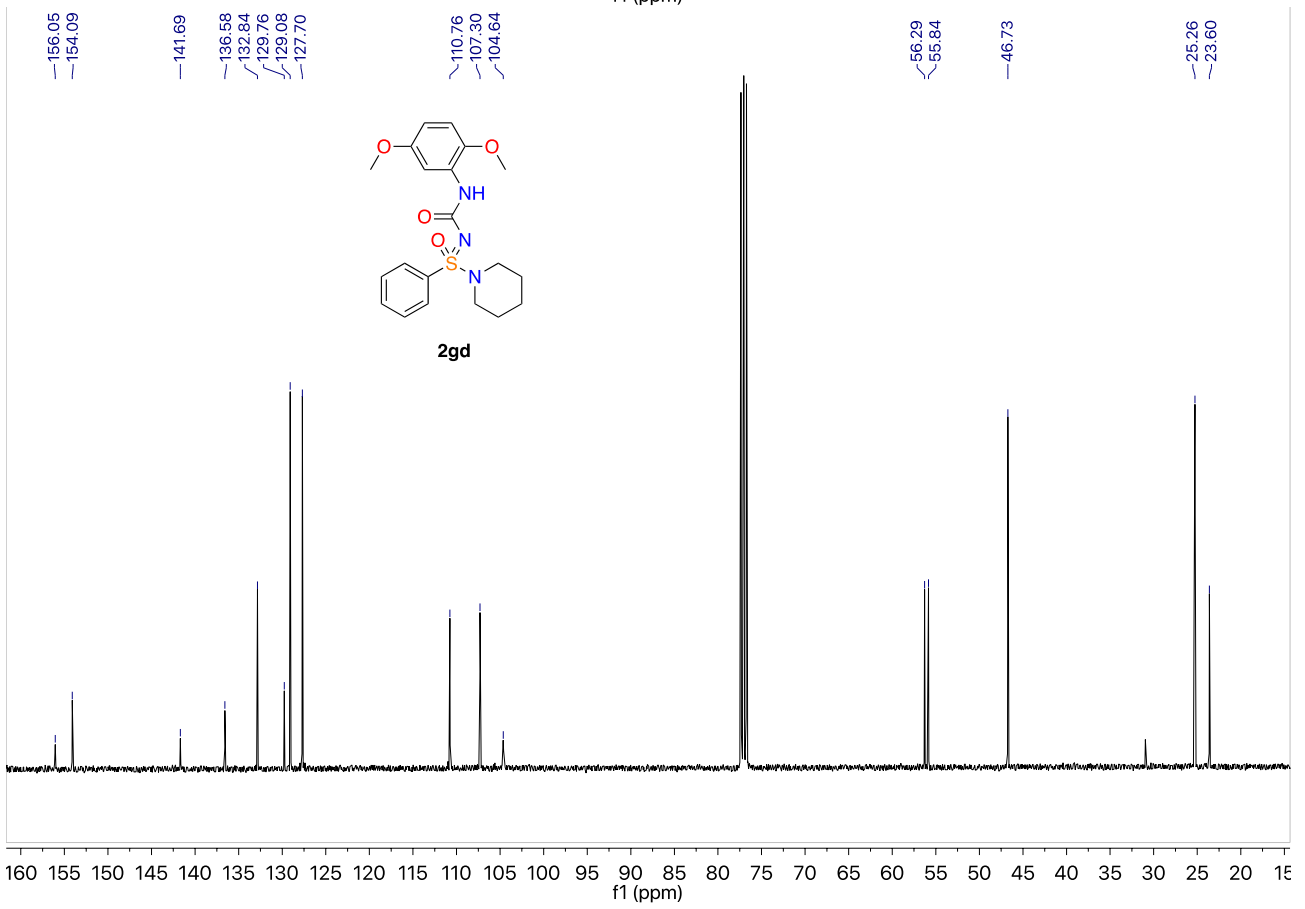

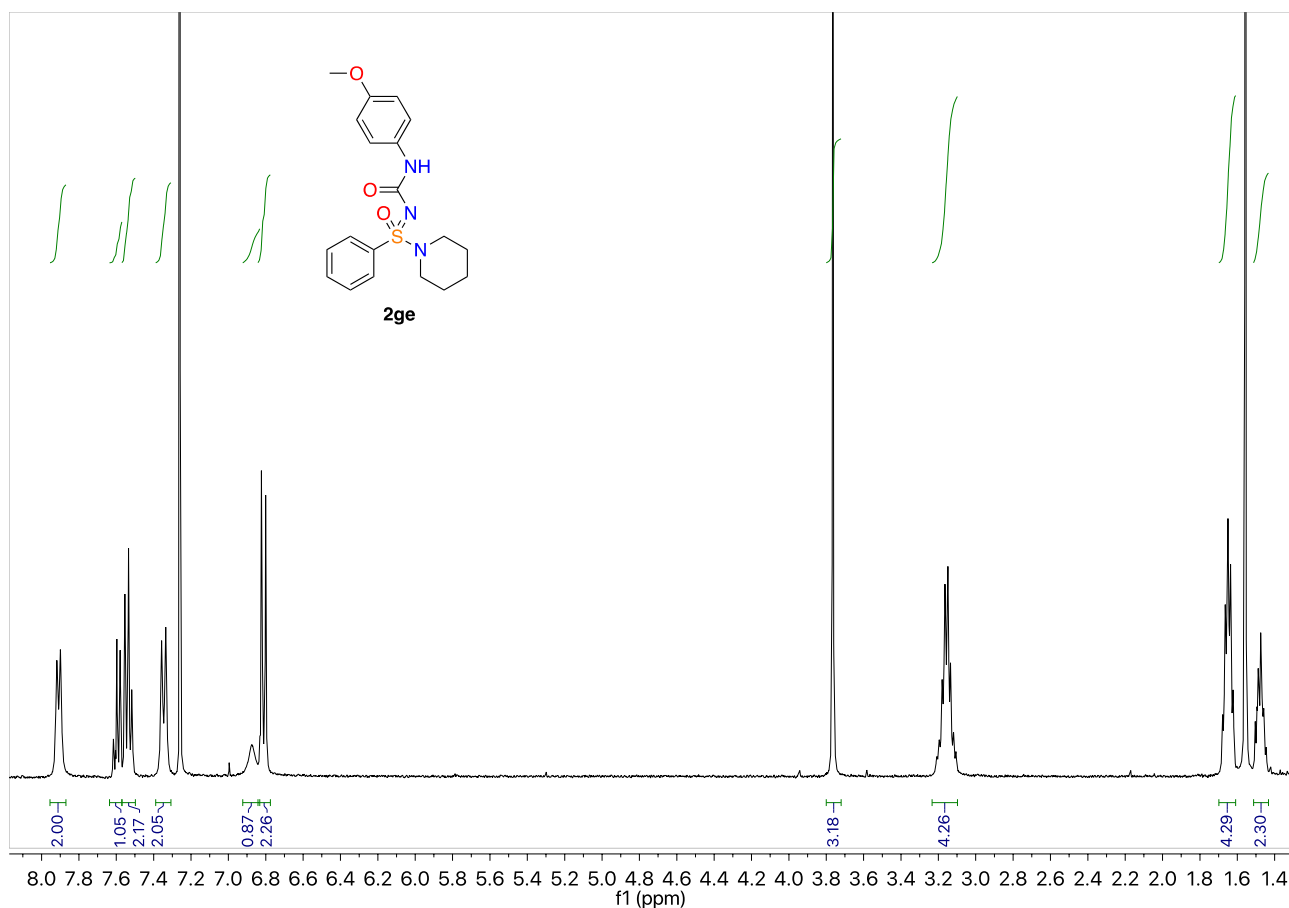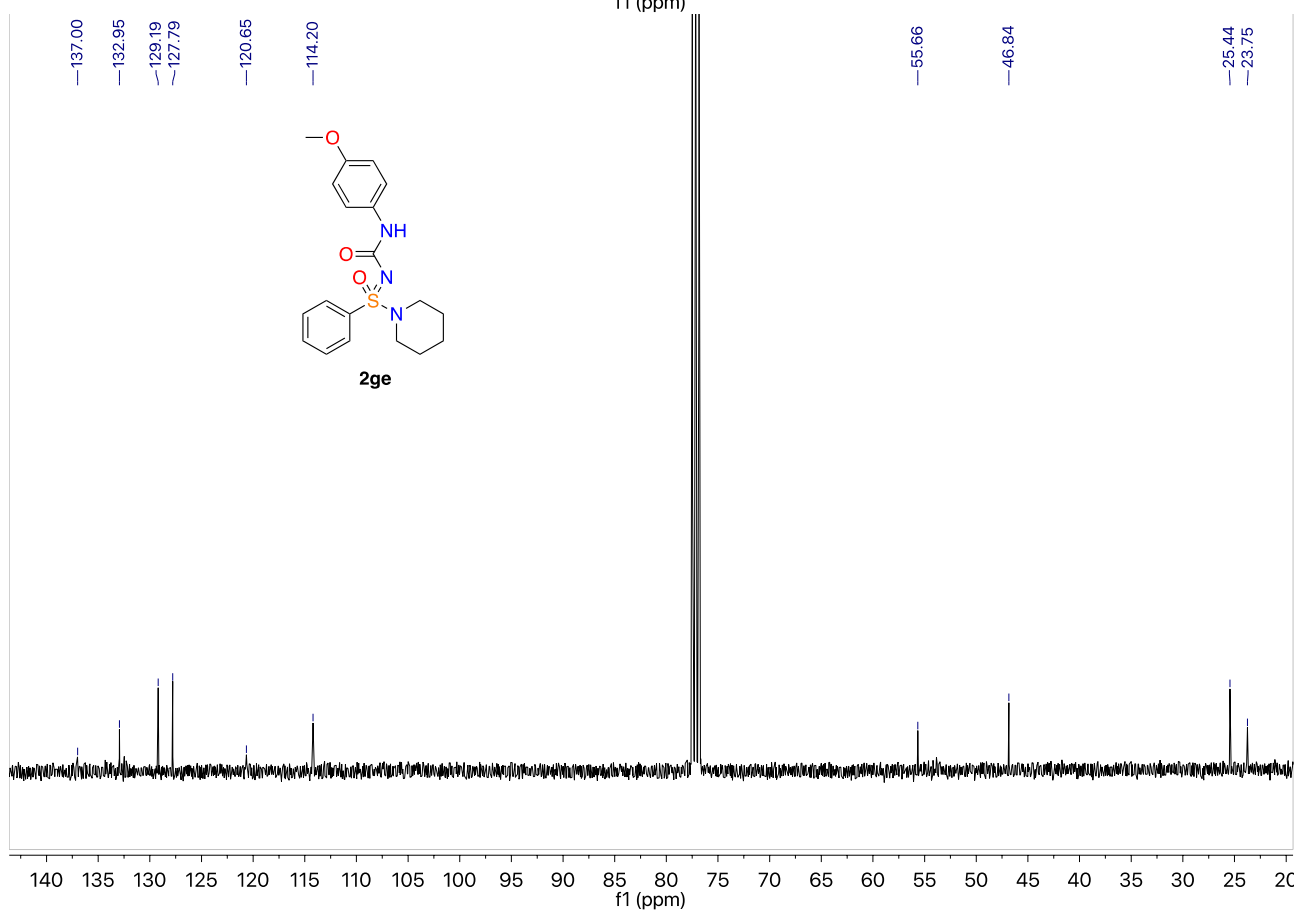



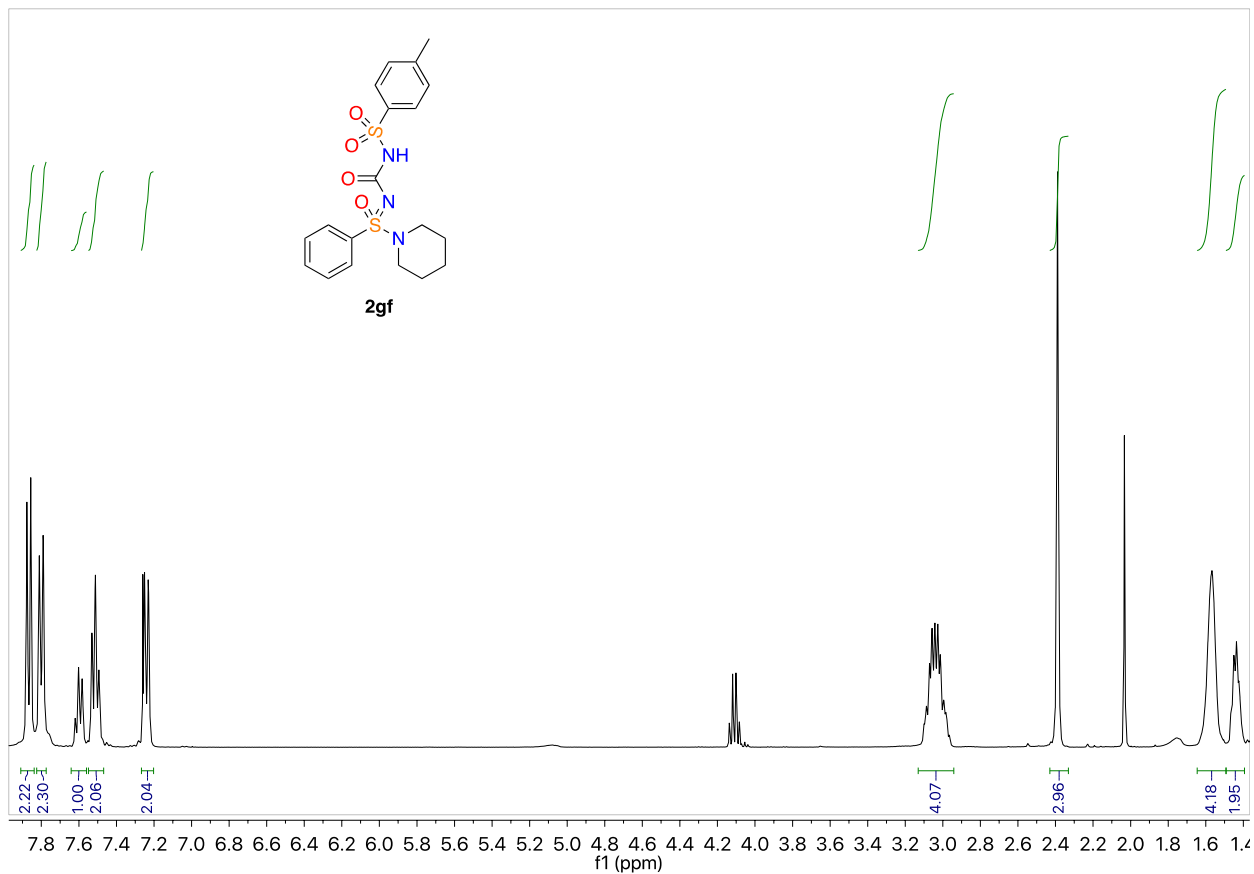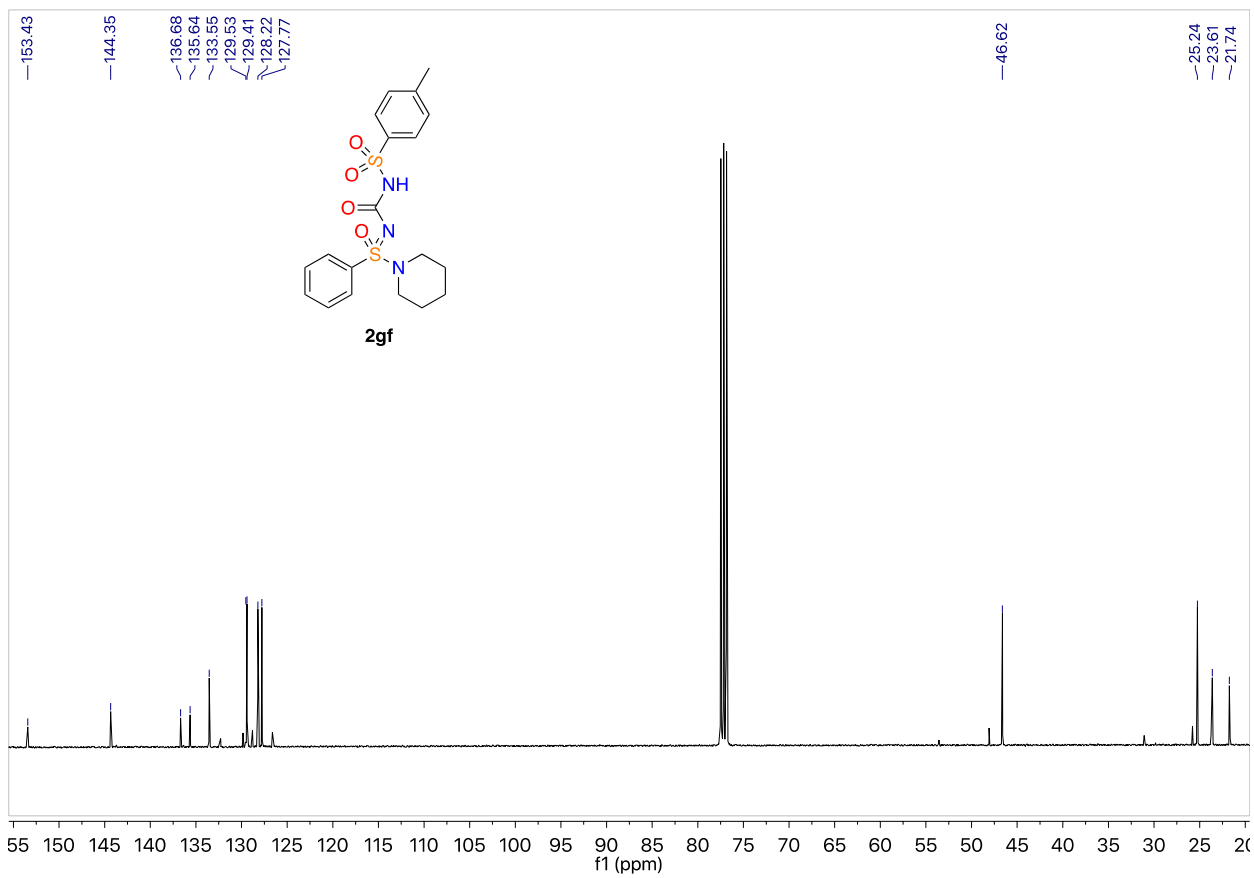

## Small molecule X-ray structures of compounds **2bg**, **2bj**, **2bk** and **2bm**

All data for compounds **2bg**, **2bj**, **2bk** and **2bm** were collected at 100 K on a Bruker Proteum X8 system equipped with a CCD area detector and Cu X-ray radiation (Cu  $K\alpha$ ,  $\lambda = 1.54178 \text{ \AA}$ ). X-ray data collection and processing of data were performed using the Proteum software package.<sup>[7]</sup> SHELXS was used for structure solution and SHELXL was used for full-matrix least-squares refinement on  $F^2$ <sup>[8]</sup> for all four X-ray structures. All non-hydrogen atoms were refined anisotropically. All carbon hydrogen atoms were placed in geometrically ideal positions using the riding model. Non-carbon hydrogen atoms were taken from the difference Fourier map. The isotropic temperature factors of all hydrogen atoms were 1.2 and 1.5 times the size of the temperature factors of the corresponding heavy atoms. The program XP in the Proteum software package was used for all molecular representations.

### 1-[*S*-Phenyl-*N*-(4-tolyl)sulfonimidoyl]piperidine (**2bg**)

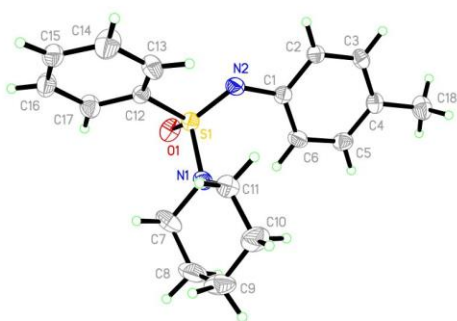

Compound **2bg** was crystallized by slow evaporation of a DCM solution of the compound at RT. A single crystal with dimensions of  $0.2 \times 0.1 \times 0.03 \text{ mm}^3$  was mounted on a CryoLoop using a protective oil. **2bg** crystallizes in the monoclinic space group  $C2/c$  with cell constants of  $a = 27.748(17) \text{ \AA}$ ,  $b = 7.812(4) \text{ \AA}$ ,  $c = 19.68(2) \text{ \AA}$  and  $\beta = 130.935(8)^\circ$ . A total of 36030 reflections of which 2468 are unique ( $R_{\text{int}} = 0.0260$ ) were collected. The final  $R$  values were  $R_1 = 0.0376$ ,  $I > 2\sigma(I)$  and  $wR_2 = 0.1012$  for all data. The crystallographic data for **2bg** have been deposited with the Cambridge Crystallographic Data Centre with deposition code CCDC 1841270.

### 4-[[Oxo(phenyl)(piperidin-1-yl)- $\lambda^6$ -sulfanylidene]amino]benzonitrile (**2bj**)

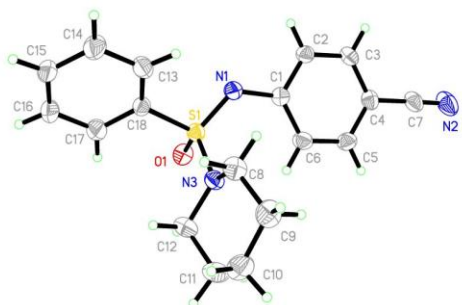

Compound **2bj** was crystallized by slow evaporation of a DCM solution of the compound at RT. A single crystal with dimensions of  $0.72 \times 0.15 \times 0.03 \text{ mm}^3$  was mounted on a CryoLoop using a protective oil. **2bj** crystallizes in the monoclinic space group  $C2/c$  with cell constants of  $a = 27.3860(14) \text{ \AA}$ ,  $b = 7.8635(4) \text{ \AA}$ ,  $c = 19.710(1) \text{ \AA}$  and  $\beta = 129.787(1)^\circ$ . A total of 31481 reflections

of which 2289 are unique ( $R_{\text{int}} = 0.0270$ ) were collected. The final  $R$  values were  $R_1 = 0.0327$ ,  $I > 2\sigma(I)$  and  $wR_2 = 0.0892$  for all data. The crystallographic data for **2bj** have been deposited with the Cambridge Crystallographic Data Centre with deposition code CCDC 1841271.

### Methyl 4-[[oxo(phenyl)(piperidin-1-yl)- $\lambda^6$ -sulfanylidene]amino]benzoate (**2bk**)

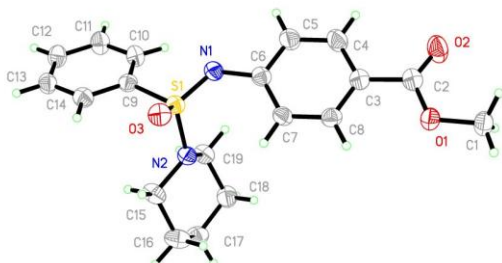

Colorless needles of compound **2bk** were obtained by slow evaporation of a DCM solution of the compound at RT. A single crystal with dimensions of  $0.17 \times 0.10 \times 0.02 \text{ mm}^3$  was mounted on a CryoLoop using a protective oil. **2bk** crystallizes in the monoclinic space group  $P2(1)/c$  with cell constants of  $a = 7.6392(3) \text{ \AA}$ ,  $b = 10.0895(4) \text{ \AA}$ ,  $c = 23.1311(9) \text{ \AA}$  and  $\beta = 91.384(2)^\circ$ . A total of 35295 reflections of which 2677 are unique ( $R_{\text{int}} = 0.0383$ ) were collected. The final  $R$  values were  $R_1 = 0.0335$ ,  $I > 2\sigma(I)$  and  $wR_2 = 0.0929$  for all data. The crystallographic data for **2bk** have been deposited with the Cambridge Crystallographic Data Centre with deposition code CCDC 1841273.

### 2-[[Oxo(phenyl)(piperidin-1-yl)- $\lambda^6$ -sulfanylidene]amino]pyridine (**2bm**)

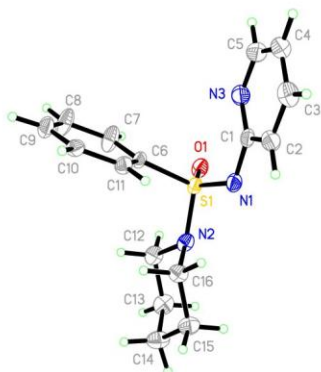

Colorless needles of compound **2bm** were obtained by slow evaporation of a DCM solution of the compound at RT. A single crystal with dimensions of  $0.72 \times 0.15 \times 0.03 \text{ mm}^3$  was mounted on a CryoLoop using a protective oil. **2bm** crystallizes in the monoclinic space group  $Cc$  with cell constants of  $a = 8.3468(10) \text{ \AA}$ ,  $b = 16.054(2) \text{ \AA}$ ,  $c = 11.8711(15) \text{ \AA}$  and  $\beta = 108.625(3)^\circ$ . A total of 44118 reflections of which 1195 are unique ( $R_{\text{int}} = 0.0358$ ) were collected. The final  $R$  values were  $R_1 = 0.0231$ ,  $I > 2\sigma(I)$  and  $wR_2 = 0.0633$  for all data. The crystallographic data for **2bm** have been deposited with the Cambridge Crystallographic Data Centre with deposition code CCDC 1841272.

## Comparison of the in vitro properties (additional examples)

**Supporting Information Table 1.** Comparison of the in vitro properties of sulfonamide **1aa** and the analogous =NH sulfonimidamide **2aa** with a structural variety of N-functionalized sulfonimidamides.

| Compound                                                                                          | Recovery [%] <sup>[a]</sup><br>(pH) | $F_{\max}^{[b]}$<br>(h/r/m)-<br>LMs<br>[%] | $F_{\max}^{[b]}$<br>rHep<br>[%] | $P_{\text{app}} \text{ A-B}^{[c]}$<br>[nm/s] | Efflux<br>ratio <sup>[c]</sup> | log <i>D</i><br>pH 7.5 <sup>[d]</sup> |
|---------------------------------------------------------------------------------------------------|-------------------------------------|--------------------------------------------|---------------------------------|----------------------------------------------|--------------------------------|---------------------------------------|
| 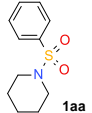<br><b>1aa</b>   | 100 (1)                             | 69 (h)                                     | 4.3                             | 393                                          | 0.64                           | 2.6                                   |
|                                                                                                   | 100 (7)                             | 10 (r)                                     |                                 |                                              |                                |                                       |
|                                                                                                   | 100 (10)                            | 26 (m)                                     |                                 |                                              |                                |                                       |
| <br><b>2aa</b>   | 100 (1)                             | 97 (h)                                     | 14                              | 378                                          | 0.59                           | 1.9                                   |
|                                                                                                   | 100 (7)                             | 30 (r)                                     |                                 |                                              |                                |                                       |
|                                                                                                   | 100 (10)                            | 79 (m)                                     |                                 |                                              |                                |                                       |
| <br><b>2ga</b>   | 100 (1)                             | 79 (h)                                     | 7.7                             | 376                                          | 0.59                           | 2.4                                   |
|                                                                                                   | 100 (7)                             | 20 (r)                                     |                                 |                                              |                                |                                       |
|                                                                                                   | 100 (10)                            | 42 (m)                                     |                                 |                                              |                                |                                       |
| <br><b>2bm</b>  | 100 (1)                             | 65 (h)                                     | 6.2                             | 447                                          | 0.53                           | 2.7                                   |
|                                                                                                   | 100 (7)                             | 6.2 (r)                                    |                                 |                                              |                                |                                       |
|                                                                                                   | 100 (10)                            | 36 (m)                                     |                                 |                                              |                                |                                       |
| <br><b>2bn</b> | 100 (1)                             | 73 (h)                                     | 13                              | 365                                          | 0.69                           | 2.9                                   |
|                                                                                                   | 100 (7)                             | 21 (r)                                     |                                 |                                              |                                |                                       |
|                                                                                                   | 100 (10)                            | 61 (m)                                     |                                 |                                              |                                |                                       |
| <br><b>2ca</b> | 100 (1)                             | 65 (h)                                     | 11                              | 297                                          | 0.65                           | 3.0                                   |
|                                                                                                   | 100 (7)                             | 26 (r)                                     |                                 |                                              |                                |                                       |
|                                                                                                   | 100 (10)                            | 28 (m)                                     |                                 |                                              |                                |                                       |
| <br><b>2cb</b> | 100 (1)                             | 62 (h)                                     | 4.9                             | 381                                          | 0.51                           | 3.5                                   |
|                                                                                                   | 100 (7)                             | 13 (r)                                     |                                 |                                              |                                |                                       |
|                                                                                                   | 100 (10)                            | 39 (m)                                     |                                 |                                              |                                |                                       |
| <br><b>2bd</b> | 100 (1)                             | 14 (h)                                     | 3.6                             | 386                                          | 0.42                           | 4.1                                   |
|                                                                                                   | 100 (7)                             | 5.4 (r)                                    |                                 |                                              |                                |                                       |
|                                                                                                   | 100 (10)                            | 16 (m)                                     |                                 |                                              |                                |                                       |
| <br><b>2bb</b> | 100 (1)                             | 12 (h)                                     | 0.3                             | 264                                          | 0.54                           | 4.1                                   |
|                                                                                                   | 100 (7)                             | 2.5 (r)                                    |                                 |                                              |                                |                                       |
|                                                                                                   | 100 (10)                            | 13 (m)                                     |                                 |                                              |                                |                                       |

[a] Hydrolytic stability measured as recovery of test compound after 24 hours with stirring at pH 1 (HCl buffer), pH 7 (phosphate-buffered saline) and pH 10 (sodium borate buffer).<sup>[9]</sup> [b] Predicted hepatic metabolic first pass given as the maximum oral bioavailability  $F_{\max}$  based on a metabolic stability assay using (i) pooled human liver microsomes (hLMs), (ii) pooled rat liver microsomes (rLMs), (iii) pooled mouse liver microsomes (mLMs) and (iv) freshly harvested rat hepatocytes (rHep).<sup>[10]</sup> [c]  $P_{\text{app}} \text{ A-B}$  (apical to basolateral) and efflux ratio (ER) data were generated in a bidirectionally performed Caco2 permeability assay in a 24-well format; ER was calculated as  $P_{\text{app}} \text{ B-A}/P_{\text{app}} \text{ A-B}$ .<sup>[10]</sup> [d] Determined by reversed-phase HPLC.<sup>[11]</sup>

**Correlation of predicted metabolic stabilities in human liver microsomes, given as  $F_{max}$ , with the corresponding  $\log D$  values (all tested compounds)**

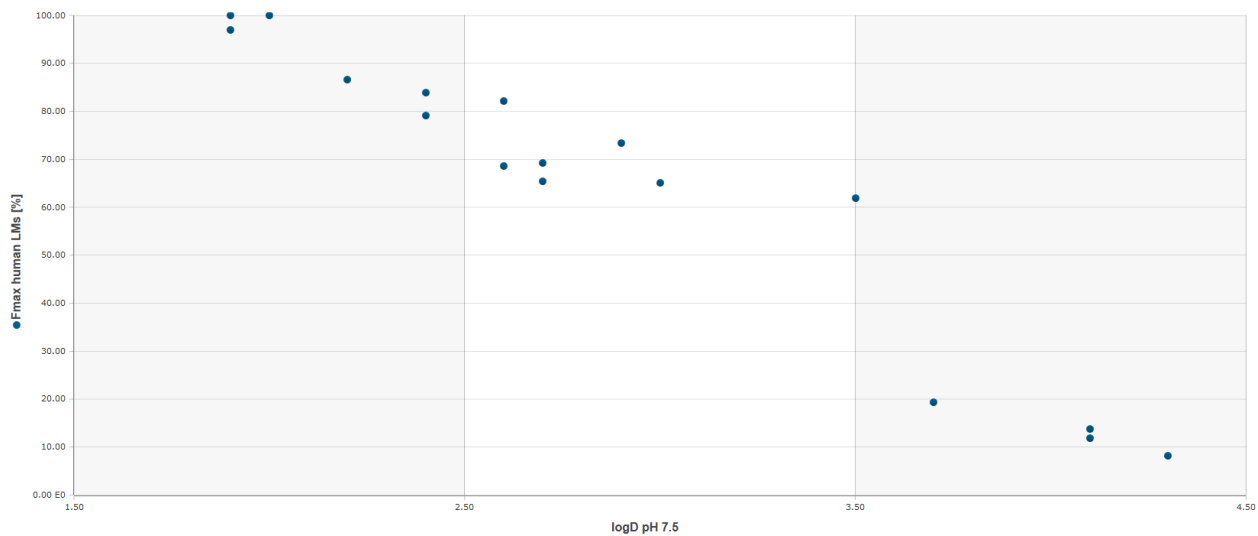

## References

- 1) F. Izzo, M. Schäfer, R. Stockman, U. Lücking, *Chem. Eur. J.* **2017**, *23*, 15189.
- 2) C. M. M. Hendriks, R. A. Bohmann, M. Bohlem, C. Bolm, *Adv. Synth. Catal.* **2014**, *356*, 1847.
- 3) F. Teng, J. Cheng, C. Bolm, *Org. Lett.* **2015**, *17*, 3166.
- 4) F. Teng, J.-T. Yu, Z. Zhou, H. Chu, J. Cheng, *J. Org. Chem.* **2015**, *80*, 2822.
- 5) M.-A. Virolleaud, V. Sridharan, D. Mailhol, D. Bonne, C. Bressy, G. Chouraqui, L. Commeiras, Y. Coquerel, J. Rodriguez, *Tetrahedron* **2009**, *65*, 9756.
- 6) M. Frings, I. Thomé, C. Bolm, *Beilstein J. Org. Chem.* **2012**, *8*, 1443.
- 7) PROTEUM2, Version 2009, Bruker, AXS Inc., Madison, Wisconsin, USA, **2009**.
- 8) G. M. Sheldrick, *Acta Crystallogr., Sect. A* **2008**, *64*, 112.
- 9) For the assay description, see: E. H. Kerns, L. Di, *Drug-like Properties: Concepts, Structure Design and Methods*, Elsevier Inc./Academic Press, Burlington, MA, USA, **2008**, pp. 353–356.
- 10) For the assay description, see U. Lücking, P. Wasnaire, A. Scholz, P. Lienau, G. Siemeister, C. Stegmann, U. Bömer, K. Zheng, P. Gao, G. Chen, J. Xi (Bayer Schering Pharma Aktiengesellschaft), WO 2015155197, **2015**.
- 11) For the assay description, see: D. J. Minick, J. H. Frenz, M. A. Patrick, D. A. Brent, *J. Med. Chem.* **1988**, *31*, 1023.
